# Supplementary material for: Bronchoscopy with and without needle-based confocal laser endomicroscopy for peripheral lung nodule diagnosis: protocol for a multicentre randomised controlled trial (CLEVER trial)
Source: PubMed Central journal article supplement — BMJ Open. 2024 Jul 4;14(7):e081148. doi: 10.1136/bmjopen-2023-081148 (PMC11227804; doi:10.1136/bmjopen-2023-081148), 2024-07-04
Supplement: bmjopen-2023-081148.draft_revisions.pdf [file bmjopen-2023-081148.draft_revisions.pdf]

# BMJ Open

BMJ Open is committed to open peer review. As part of this commitment we make the peer review history of every article we publish publicly available.

When an article is published we post the peer reviewers' comments and the authors' responses online. We also post the versions of the paper that were used during peer review. These are the versions that the peer review comments apply to.

The versions of the paper that follow are the versions that were submitted during the peer review process. They are not the versions of record or the final published versions. They should not be cited or distributed as the published version of this manuscript.

BMJ Open is an open access journal and the full, final, typeset and author-corrected version of record of the manuscript is available on our site with no access controls, subscription charges or pay-per-view fees (<http://bmjopen.bmj.com>).

If you have any questions on BMJ Open's open peer review process please email [info.bmjopen@bmj.com](mailto:info.bmjopen@bmj.com)

# BMJ Open

## Design of a multicenter, randomized controlled trial on needle-based confocal laser endomicroscopy guided bronchoscopy for peripheral lung nodule diagnosis (CLEVER trial)

|                               |                                                                                                                                                                                                                                                                                                                                                                                                                                                                                                                                                                                                                                                                                                                                                                                                                                                                                                                                                                                                                                                                                                                                                                                                                                                                                                                                                                                                                                                                                                                                                                                                                                                                                                                                                                                                                                                                                                                                                                                                                                                                                                                                                                                                       |
|-------------------------------|-------------------------------------------------------------------------------------------------------------------------------------------------------------------------------------------------------------------------------------------------------------------------------------------------------------------------------------------------------------------------------------------------------------------------------------------------------------------------------------------------------------------------------------------------------------------------------------------------------------------------------------------------------------------------------------------------------------------------------------------------------------------------------------------------------------------------------------------------------------------------------------------------------------------------------------------------------------------------------------------------------------------------------------------------------------------------------------------------------------------------------------------------------------------------------------------------------------------------------------------------------------------------------------------------------------------------------------------------------------------------------------------------------------------------------------------------------------------------------------------------------------------------------------------------------------------------------------------------------------------------------------------------------------------------------------------------------------------------------------------------------------------------------------------------------------------------------------------------------------------------------------------------------------------------------------------------------------------------------------------------------------------------------------------------------------------------------------------------------------------------------------------------------------------------------------------------------|
| Journal:                      | <i>BMJ Open</i>                                                                                                                                                                                                                                                                                                                                                                                                                                                                                                                                                                                                                                                                                                                                                                                                                                                                                                                                                                                                                                                                                                                                                                                                                                                                                                                                                                                                                                                                                                                                                                                                                                                                                                                                                                                                                                                                                                                                                                                                                                                                                                                                                                                       |
| Manuscript ID                 | bmjopen-2023-081148                                                                                                                                                                                                                                                                                                                                                                                                                                                                                                                                                                                                                                                                                                                                                                                                                                                                                                                                                                                                                                                                                                                                                                                                                                                                                                                                                                                                                                                                                                                                                                                                                                                                                                                                                                                                                                                                                                                                                                                                                                                                                                                                                                                   |
| Article Type:                 | Protocol                                                                                                                                                                                                                                                                                                                                                                                                                                                                                                                                                                                                                                                                                                                                                                                                                                                                                                                                                                                                                                                                                                                                                                                                                                                                                                                                                                                                                                                                                                                                                                                                                                                                                                                                                                                                                                                                                                                                                                                                                                                                                                                                                                                              |
| Date Submitted by the Author: | 19-Oct-2023                                                                                                                                                                                                                                                                                                                                                                                                                                                                                                                                                                                                                                                                                                                                                                                                                                                                                                                                                                                                                                                                                                                                                                                                                                                                                                                                                                                                                                                                                                                                                                                                                                                                                                                                                                                                                                                                                                                                                                                                                                                                                                                                                                                           |
| Complete List of Authors:     | <p>van Heumen, Saskia; Amsterdam University Medical Centres, Department of Respiratory Medicine</p> <p>Kramer, Tess; Amsterdam University Medical Centres, Department of Respiratory Medicine</p> <p>Korevaar, Daniël; Amsterdam University Medical Centres, Department of Respiratory Medicine</p> <p>Gompelmann, Daniela; Medical University of Vienna, Department of Internal Medicine II, Division of Pulmonology</p> <p>Bal, Christina; Medical University of Vienna, Department of Internal Medicine II, Division of Pulmonology</p> <p>Hetzel, Juergen; Kantonsspital Winterthur, Department of Internal Medicine, Division of Pneumology</p> <p>Haentschel, Maik; Kantonsspital Winterthur, Department of Internal Medicine, Division of Pneumology</p> <p>Poletti, V; Morgagni-Pierantoni Hospital, Department of Thoracic Diseases Ravaglia , Claudia; Morgagni-Pierantoni Hospital, Department of Thoracic Diseases, G.B. Morgagni Hospital and University of Bologna, Forli, Italy</p> <p>Sadoughi, Ali; UC Irvine, Division of Pulmonary Diseases and Critical Care Medicine</p> <p>Stratakos, Grigoris; National and Kapodistrian University of Athens, 1st Respiratory Medicine Department of the National Kapodistrian University of Athens</p> <p>Koukaki, Evangelia; National and Kapodistrian University of Athens, 1st Respiratory Medicine Department of the National Kapodistrian University of Athens</p> <p>Anagnostopoulos, Nektarios; National and Kapodistrian University of Athens, 1st Respiratory Medicine Department of the National Kapodistrian University of Athens</p> <p>Votruba, Jiří; General University Hospital in Prague, 1st Department of Tuberculosis and Respiratory Diseases, First Faculty of Medicine</p> <p>Šestáková, Zuzana; General University Hospital in Prague, 1st Department of Tuberculosis and Respiratory Diseases, First Faculty of Medicine</p> <p>Heuvelmans, Marjolein; Amsterdam University Medical Centres, Department of Respiratory Medicine</p> <p>Daniels, Johannes ; Amsterdam University Medical Centres, Department of Respiratory Medicine</p> <p>de Bruin, Daniel; Amsterdam University Medical Centres, Department of</p> |

1  
2  
3  
4  
5  
6  
7  
8  
9  
10  
11  
12  
13  
14  
15  
16  
17  
18  
19  
20  
21  
22  
23  
24  
25  
26  
27  
28  
29  
30  
31  
32  
33  
34  
35  
36  
37  
38  
39  
40  
41  
42  
43  
44  
45  
46  
47  
48  
49  
50  
51  
52  
53  
54  
55  
56  
57  
58  
59  
60

|           |                                                                                                                                                                                                                                                                          |
|-----------|--------------------------------------------------------------------------------------------------------------------------------------------------------------------------------------------------------------------------------------------------------------------------|
|           | Biomedical Engineering and Physics; Cancer Centre Amsterdam, Imaging and Biomarkers<br>Bonta, Peter; Amsterdam University Medical Centres, Department of Respiratory Medicine<br>Annema, Jouke; Amsterdam University Medical Centres, Department of Respiratory Medicine |
| Keywords: | Biopsy, Clinical Trial, Diagnostic Imaging, Respiratory tract tumours < ONCOLOGY, Cytopathology < PATHOLOGY                                                                                                                                                              |
|           |                                                                                                                                                                                                                                                                          |

SCHOLARONE™  
Manuscripts

# Design of a multicenter, randomized controlled trial on needle-based confocal laser endomicroscopy guided bronchoscopy for peripheral lung nodule diagnosis (CLEVER trial)

S. van Heumen<sup>1</sup>, T. Kramer<sup>1</sup>, D.A. Korevaar<sup>1</sup>, D. Gompelmann<sup>2</sup>, C. Bal<sup>2</sup>, J. Hetzel<sup>3</sup>, M. Haentschel<sup>3</sup>, V. Poletti<sup>4</sup>, C. Ravaglia<sup>4</sup>, A. Sadoughi<sup>5</sup>, G. Stratakos<sup>6</sup>, E. Koukaki<sup>6</sup>, N. Anagnostopoulos<sup>6</sup>, J. Votruba<sup>7</sup>, Z. Šestáková<sup>7</sup>, M.A. Heuvelmans<sup>1</sup>, J.M.A. Daniels<sup>1</sup>, D.M. de Bruin<sup>8,9</sup>, P.I. Bonta<sup>1</sup>, J.T. Annema<sup>1\*</sup>

\*Corresponding author: Prof. dr. J.T. Annema, [j.t.annema@amsterdamumc.nl](mailto:j.t.annema@amsterdamumc.nl)

<sup>1</sup> Department of Respiratory Medicine, Amsterdam University Medical Centers, Amsterdam, The Netherlands

<sup>2</sup> Department of Internal Medicine II, Division of Pulmonology, Medical University of Vienna, Vienna, Austria

<sup>3</sup> Department of Internal Medicine, Division of Pneumology, Kantonspital Winterthur, Winterthur, Switzerland

<sup>4</sup> Department of Thoracic Diseases, G.B. Morgagni Hospital and University of Bologna, Forlì, Italy

<sup>5</sup> Division of Pulmonary Diseases and Critical Care Medicine, UC Irvine, CA, USA

<sup>6</sup> 1st Respiratory Medicine Department of the National, Kapodistrian University of Athens, Athens, Greece

<sup>7</sup> 1st Department of Tuberculosis and Respiratory Diseases, First Faculty of Medicine, Charles University and General University Hospital in Prague, Prague, Czech Republic

<sup>8</sup> Department of Biomedical Engineering and Physics, Amsterdam University Medical Centers, Amsterdam

<sup>9</sup> Cancer Center Amsterdam, Imaging and Biomarkers, Amsterdam, The Netherlands

## Abstract

**Introduction:** Despite many technological advances, the diagnostic yield of bronchoscopic peripheral lung nodule analysis remains limited due to frequent mispositioning. Needle-based confocal laser endomicroscopy (nCLE) enables real-time microscopic feedback on needle positioning, potentially improving the sampling location and diagnostic yield. Previous studies have defined and validated nCLE criteria for malignancy, airway, and lung parenchyma. Larger studies demonstrating the effect of nCLE on diagnostic yield are lacking. We aim to investigate if nCLE-imaging integrated with conventional bronchoscopy results in a higher diagnostic yield compared to conventional bronchoscopy without nCLE.

**Methods and analysis:** This is a parallel-group randomized controlled trial. Recruitment is performed at pulmonology outpatient clinics in university and general hospitals in six different European countries and one hospital in the United States. Consecutive patients with a suspected peripheral lung nodule (10-30 mm) with a bronchus sign and an indication for diagnostic bronchoscopy will be screened, and 208 patients will be included. Web-based randomization (1:1) between the two procedures will be performed. The primary outcome is diagnostic yield. Secondary outcomes include diagnostic sensitivity for malignancy, needle repositionings, procedure and fluoroscopy duration, and complications. Pathologists will be blinded to procedure type; patients and endoscopists will not.

**Discussion:** Results of the CLEVER trial will inform on the added value of nCLE for the bronchoscopic diagnosis of peripheral lung nodules.

**Ethics and dissemination:** Approved by the Ethics Committee of the Amsterdam University Medical Center. Dissemination involves publication in a peer-reviewed journal.

**Support:** Financial and material support from Mauna Kea Technologies.

**Trial registration:** ClinicalTrials.gov NCT06079970.

**Keywords:** Respiratory tract neoplasms, bronchoscopy, confocal laser scanning microscopy, nCLE, rapid-on-site evaluation (ROSE), histology/cytology, lung cancer, peripheral lung nodule

**Manuscript word count:** 3923

## Article summary

### Strengths and limitations

- This is the first multicenter randomized controlled trial on needle-based confocal laser endomicroscopy (nCLE) for bronchoscopic diagnosis of peripheral lung nodules; this study will provide interventional pulmonologist with important information about the added benefit of the nCLE technique.
- The outcomes will offer pulmonologist information to identify specific patients that may benefit from the addition of nCLE.
- The definition of diagnostic yield is under debate. In this study, the diagnostic yield will be reported based on two different definitions for better comparison with existing and future studies.
- Each participating center uses their own methods for conventional bronchoscopic diagnosis of peripheral lung nodules and will therefore not be completely uniform across all centers; this is a

1  
2  
3 limitation to the study design. Each center will keep conventional methods uniform in both the  
4 control and intervention group to ensure differences can be attributed to the nCLE technique.  
5  
6  
7

## 8 Introduction

9

10 Lung cancer remains the leading causes of cancer-related deaths, with 2.09 million new diagnoses and  
11 1.76 million deaths worldwide per year.(1, 2) The increased use of chest computed tomography (CT)  
12 and the future implementation of low-dose CT lung cancer screening programs result in an increased  
13 detection of lung nodules.(3, 4) Consequently, more early-stage lung cancer is detected, which is most  
14 often located in the periphery of the lung.(5, 6) Depending on lesion characteristics and associated  
15 risk factors, tissue sampling is needed to establish a definitive diagnosis and determine the  
16 appropriate treatment.  
17  
18  
19  
20  
21  
22

23  
24 Bronchoscopic analysis of peripheral lung nodules remains challenging despite many technological  
25 innovations. The procedure comprises three essential pillars needed for a diagnostic success: [1]  
26 navigation to the lesion, [2] confirmation of tool location within the lesion (i.e., tool-in-lesion  
27 confirmation) and [3] successful tissue sampling. In the past years, fluoroscopy, radial probe  
28 endobronchial ultrasound (r-EBUS), electromagnetic navigation (EMN), virtual bronchoscopy (VB) or  
29 cone beam computed tomography (CBCT) combined with augmented fluoroscopy have improved  
30 navigation with or without tool-in-lesion confirmation.(7) Additionally, rapid on-site evaluation (ROSE)  
31 is sometimes used for direct feedback on representativeness of the sample and forming a preliminary  
32 diagnosis. Nevertheless, diagnostic yield rarely exceeds 71%, (8) as it depends highly on factors such  
33 as nodule size, bronchus sign on pre-procedural CT, eccentric vs. concentric r-EBUS pattern and pre-  
34 test probability of malignancy.(9, 10) The arrival of robotic bronchoscopy platforms combined with  
35 existing techniques have shown promising results with high navigation success rates. However,  
36 diagnostic yield remains behind due to substantial mispositioning rates, retaining a large gap between  
37 navigation success and diagnostic yield.(11-13) The persistently low diagnostic yield rates calls for  
38 complementary techniques providing real-time information for fine-tuning the needle position.  
39  
40  
41  
42  
43  
44  
45  
46  
47  
48  
49

50  
51 Confocal laser endomicroscopy (CLE) is a microscopic technique that visualizes individual cells in real-  
52 time with high resolution. It has proven useful in the field of gastroenterology, where it has been  
53 demonstrated that CLE could be used for rapid diagnosis, targeting of biopsies, and prediction of  
54 neoplasms.(14) CLE has been recently introduced in the respiratory tract, including for the peripheral  
55 lung nodule analysis.(15-17) Current CLE probes are thin enough to fit through 18G biopsy needles to  
56 provide microscopic feedback at the tip of the needle (needle-based CLE (nCLE)). Fluorescein dye is  
57  
58  
59  
60

1  
2  
3 used as a contrast agent and binds to the extracellular matrix, resulting in a highly fluorescent  
4 background in which individual cells can be seen. Previous studies have identified three nCLE image  
5 characteristics for malignancy in the lung (dark clumps, enlarged pleomorphic cells, and directional  
6 streaming),(17) and criteria for airway and lung parenchyma (elastic fiber bundles, bronchial  
7 epithelium, and alveoli).(16) The identification of malignancy and distinction from airway and lung  
8 parenchyma were accurate based on these criteria.(16, 17)

9  
10  
11 A recent study demonstrated a high needle mispositioning rate, as nCLE-imaging resulted in a  
12 repositioning of the biopsy needle in 9 out of 20 patients.(18) nCLE could therefore potentially bridge  
13 the gap between navigation success and diagnostic yield.

14  
15  
16 To date, larger studies investigating the effect of the addition of nCLE to bronchoscopic peripheral  
17 lung nodule analysis are lacking. The improved diagnostic yield could reduce the necessity further or  
18 more invasive diagnostic interventions such as CT-guided transthoracic biopsies or diagnostic surgery.  
19 In this multicenter randomized controlled trial, we aim to investigate if nCLE-imaging integrated with  
20 conventional bronchoscopy results in a higher diagnostic yield compared to conventional  
21 bronchoscopy without nCLE in diagnosing peripheral lung nodules.

## 22 23 24 25 26 27 28 29 30 31 **Methods and analysis**

### 32 33 34 **Study design**

35  
36 This study is an investigator-initiated, international, multicenter, parallel-group randomized  
37 controlled trial comparing two bronchoscopy procedures (with or without nCLE) for the diagnosis of  
38 suspected peripheral lung nodules. The study flowchart is shown in Figure 1.

### 39 40 41 42 43 44 **Participating centers**

45  
46 The study is executed in university or general hospitals in six countries in Europe and one hospital in  
47 the United States.

### 48 49 50 51 52 **Randomization**

53  
54 After the participant has given written informed consent, patient data is entered into a digital  
55 database (CASTOR Electronic Data Capture (EDC) electronic case report form (eCRF)). We will use a  
56 web-based block-randomization module in Castor to randomize participants into the control and  
57 interventional group (1:1). Randomization will be stratified by participating center to ensure that the  
58  
59  
60

1  
2  
3 nCLE and non-nCLE group is of the same size in each center. As nodule size has significant impact on  
4 diagnostic yield,(8) we will stratify for nodule size ( $\leq 20$  mm and  $>20$  mm) to ensure that size is evenly  
5 distributed across study arms.  
6  
7

8  
9  
10 Patients and endoscopists will not be blinded since the physician needs to know if nCLE images must  
11 be acquired during bronchoscopy. Pathologists will be blinded to procedure type and raters who will  
12 analyze the nCLE videos after the procedure will be blinded to the patient history and  
13 histopathological outcome of the tissue samples.  
14  
15  
16

## 17 18 19 **Study population**

20  
21 Consecutive patients will be recruited by their treating physician at pulmonology outpatient clinics of  
22 participating centers. Patients are eligible for inclusion if they meet the following inclusion criteria:

- 23 1.  $\geq 18$  years of age
- 24 2. Suspected malignant peripheral lung lesion with an indication for a bronchoscopic diagnostic  
25 work-up as determined by the attending physician or tumor board. Peripheral pulmonary  
26 lesions are defined as lesions located beyond the visible segmental bronchi, not detectable by  
27 regular flexible bronchoscopy.
- 28 3. Solid part of the lesion must be  $>10$  mm
- 29 4. Largest dimension of lesion size on CT  $\leq 30$  mm (long-axis)
- 30 5. Positive bronchus sign on pre-procedural CT-scan: in case no airway leads to the target lesion,  
31 our expectations are that the chance of reaching the lesion with a conventional bronchoscope  
32 are very low. As nCLE is still dependent on bronchoscopic navigation to bring the needle in the  
33 proximity of the target nodule, the added value of nCLE-imaging is estimated to be redundant in  
34 the absence of a bronchus sign.
- 35 6. Ability to understand and willingness to sign a written informed consent

36  
37  
38  
39  
40  
41  
42  
43  
44  
45  
46  
47  
48 A potential subject who meets any of the following criteria will be excluded from participation in this  
49 study:

- 50 1. Inability or non-willingness to provide informed consent
  - 51 2. Endobronchial visible malignancy on bronchoscopic inspection
  - 52 3. Target lesion within reach of the linear EBUS scope
  - 53 4. Failure to comply with the study protocol
  - 54 5. Known allergy or risk factors for an allergic reaction to fluorescein
  - 55 6. Pregnancy or breastfeeding
- 56  
57  
58  
59  
60



- 1
  - 2
  - 3
  - 4
  - 5
  - 6
  - 7
  - 8
  - 9
  - 10
  - 11
  - 12
  - 13
  - 14
  - 15
  - 16
  - 17
  - 18
  - 19
  - 20
  - 21
  - 22
  - 23
  - 24
  - 25
  - 26
  - 27
  - 28
  - 29
  - 30
  - 31
  - 32
  - 33
  - 34
  - 35
  - 36
  - 37
  - 38
  - 39
  - 40
  - 41
  - 42
  - 43
  - 44
  - 45
  - 46
  - 47
  - 48
  - 49
  - 50
  - 51
  - 52
  - 53
  - 54
  - 55
  - 56
  - 57
  - 58
  - 59
  - 60
7. Hemodynamic instability
  8. Refractory hypoxemia
  9. Therapeutic anticoagulant use that cannot be withheld for an appropriate interval before the procedure
  10. Unable to tolerate general anesthesia according to the anesthesiologist
  11. Undergoing chemotherapy as several chemotherapies have fluorescent properties at the same wavelength (e.g., doxorubicin)

### Primary outcome measure

Diagnostic yield (defined as the proportion of patients in whom the bronchoscopic procedure results in a definitive diagnosis (either malignant, specific benign or non-specific benign confirmed as benign in follow-up), relative to the total number of patients that underwent the diagnostic bronchoscopic procedure). If patients with multiple lesions are included, the diagnostic yield will be computed per nodule.

### Secondary outcome measures

1. Diagnostic sensitivity for malignancy (defined as the proportion of patients in whom the bronchoscopic procedure diagnoses malignancy relative to the total number of patients with a final diagnosis of malignancy as determined by the reference standard).
2. Diagnostic yield according to the strict definition by Vachani et al.(19) (defined as the proportion of patients in whom the bronchoscopic procedure results in a definitive diagnosis [either malignant or specific benign diagnosis], relative to the total number of patients that underwent the diagnostic bronchoscopic procedure).
3. Procedure duration (from bronchoscope insertion until removal).
4. Percentage of patients in which the needle was fine-tuned (defined as moving the needle within the same distal airway) or repositioned (defined as the selection of a different distal airway for tissue sampling) based on nCLE feedback (defined as the number of patients the needle was fine-tuned/repositioned divided by the total number of patients in which nCLE imaging was used).
5. Radiation dose.
6. Diagnostic yield of ROSE (defined as the proportion of patients in whom ROSE resulted in a classifying diagnosis [malignant or specific benign diagnosis], relative to the total number of patients).

- 1
  - 2
  - 3
  - 4
  - 5
  - 6
  - 7
  - 8
  - 9
  - 10
  - 11
  - 12
  - 13
  - 14
  - 15
  - 16
  - 17
  - 18
  - 19
  - 20
  - 21
  - 22
  - 23
  - 24
  - 25
  - 26
  - 27
  - 28
  - 29
  - 30
  - 31
  - 32
  - 33
  - 34
  - 35
  - 36
  - 37
  - 38
  - 39
  - 40
  - 41
  - 42
  - 43
  - 44
  - 45
  - 46
  - 47
  - 48
  - 49
  - 50
  - 51
  - 52
  - 53
  - 54
  - 55
  - 56
  - 57
  - 58
  - 59
  - 60
7. Proportion of patients in which ROSE provided tool-in-lesion confirmation, meaning that the acquired tissue shows signs of a malignant or non-malignant diagnosis and was not related to airway/lung parenchyma sampling such as bronchus epithelium/blood contamination, and tissue not suitable for a specific diagnosis such as atypical cells.
  8. Complication rate (defined as any complication or complication categories occurring during or directly after the bronchoscopic procedure or any procedure-related complication within one week after the procedure).
  9. Requirement of additional diagnostic procedures (CT-guided transthoracic biopsies, surgical diagnostics and/or additional bronchoscopy) during the 6-month follow-up period.

### Exploratory endpoints

As an exploratory endpoint, we aim to identify potential new nCLE image characteristics for malignant and benign pathologies. We will also create an algorithm for automated nCLE criteria recognition using machine- or deep-learning methods.

### Outcome parameters

Table 1 shows the baseline patient characteristics and corresponding procedural information that will be collected at the time of study inclusion, during the procedure and 6-month follow-up period.

### Investigational product

The Cellvizio® confocal laser endomicroscopy system with the corresponding AQ-Flex™ 19 miniprobe (Mauna Kea technologies, Paris, France) is the investigational medical device of this study. The probe has a compatible operating diameter of 0.91 mm, a resolution of 3,5 µm, a penetration depth of 40 to 50 µm and a maximum field of view of 325 µm. The device and corresponding probes are CE-marked and will be used within the intended purpose.(20)

The technique uses a laser beam (488 nm) focused by an objective lens to illuminate the tissue, with the illumination focus at a pre-defined depth. The light strikes the tissue resulting in fluorescent light emission back from autofluorescent structures such as elastin in the airways or an exogenous fluorescent dye such as fluorescein, a contrast dye used for nCLE imaging in the lung. Light originating from the focal layer will be focused by the objective lens at the opening of a pinhole and detected, while light from out-of-focus layers is rejected by the pinhole. This results in high-resolution imaging of individual cells and structures at a specific point with limited influence of (scattered) light from out-

1  
2  
3 of-focus areas.(20) The advantage of needle-based CLE is that it has the capability to provide real-time  
4 high-resolution information on a microscopic level at the tip of the biopsy needle.  
5  
6  
7  
8  
9  
10  
11  
12  
13  
14  
15  
16  
17  
18  
19  
20  
21  
22  
23  
24  
25  
26  
27  
28  
29  
30  
31  
32  
33  
34  
35  
36  
37  
38  
39  
40  
41  
42  
43  
44  
45  
46  
47  
48  
49  
50  
51  
52  
53  
54  
55  
56  
57  
58  
59  
60

For peer review only

Table 1: Data to be collected

|                                                                                                                                                                                                                                    |
|------------------------------------------------------------------------------------------------------------------------------------------------------------------------------------------------------------------------------------|
| <b>Patient characteristics</b>                                                                                                                                                                                                     |
| Age                                                                                                                                                                                                                                |
| Sex                                                                                                                                                                                                                                |
| BMI                                                                                                                                                                                                                                |
| Smoking history                                                                                                                                                                                                                    |
| Patient cancer history                                                                                                                                                                                                             |
| Family history of lung cancer                                                                                                                                                                                                      |
| <b>Pre-procedural (PET)CT scan lesion characteristics</b>                                                                                                                                                                          |
| Size (largest diameter)                                                                                                                                                                                                            |
| Localization (segmental level)                                                                                                                                                                                                     |
| Lesion appearance/nodule type (Solid, non-solid/ground glass, partially solid)                                                                                                                                                     |
| Spiculation sign (present/absent)                                                                                                                                                                                                  |
| Emphysema (present/absent)                                                                                                                                                                                                         |
| PET uptake (not performed/no uptake/faint ( $SUV < 1$ )/moderate ( $SUV 1 - 2.5$ ) /intense ( $SUV > 2.5$ ))                                                                                                                       |
| <b>Intra-procedural information</b>                                                                                                                                                                                                |
| r-EBUS sign (eccentric, concentric, absent)                                                                                                                                                                                        |
| Location of tissue sampling (lung segment)                                                                                                                                                                                         |
| nCLE image observations (for every needle pass)                                                                                                                                                                                    |
| Needle fine-tuning & repositioning done (for every needle pass)                                                                                                                                                                    |
| Sampling techniques used (TBNA, biopsy, brush)                                                                                                                                                                                     |
| ROSE results of tissue sample (if available)                                                                                                                                                                                       |
| Bronchoscopy start and end time                                                                                                                                                                                                    |
| Fluoroscopy duration                                                                                                                                                                                                               |
| Additional procedures performed (e.g., EBUS/EUS-B/etc.)                                                                                                                                                                            |
| (Serious) complications                                                                                                                                                                                                            |
| <b>Post-procedural information</b>                                                                                                                                                                                                 |
| (Serious) complications (up to 1 week after the procedure)                                                                                                                                                                         |
| Final pathological diagnosis (cytology and/or histology)                                                                                                                                                                           |
| (Additional) Diagnostic follow-up procedures needed (e.g., transthoracic needle biopsies, surgery, additional bronchoscopy, follow-up imaging) including (altered) diagnosis and/or results of follow-up CT-scans of the lesion(s) |

*RUL: right upper lobe; RML: right middle lobe; RLL; right lower lobe; LUP: left upper lobe; LLL: left lower lobe; CT: computed tomography; ROSE: rapid on-site evaluation; r-EBUS: radial endobronchial ultrasound; TBNA: transbronchial needle aspiration; SUV: standard uptake value*

## Study procedures

### Conventional diagnostic bronchoscopy (control group & intervention group)

The following procedure will be performed routinely (regardless of study participation): Bronchoscopic procedures will be performed at the pulmonology department by experienced pulmonologists specifically trained in navigational bronchoscopy and nCLE-imaging. Bronchoscopists are aware of the study randomization arm. All procedures are performed according to institutional practice, usually on an outpatient basis. Patient preparation and sedation will be done according to institutional practice and might include deep propofol sedation or midazolam sedation. Topical anesthesia will usually be applied to the pharynx, larynx, trachea, and bronchi. Vital parameters will be monitored during and after the procedure.

Systematic bronchoscopic inspection of the airways will be performed, followed by r-EBUS imaging (guide sheath optional) to select the distal airway with the highest probability of reaching the lesion. The use of fluoroscopy, EMN, VB or ultrathin bronchoscope is optional if regularly used at that institution. CBCT navigation will not be used in patients included in this trial. Transbronchial needle aspirations (TBNA) using the 18G FlexNeedle® (Broncus Medical Inc., San Jose, United States of America) and biopsies will be performed to acquire tissue for pathological evaluation (a recommended minimum of 3 TBNA and 3 biopsies). During the bronchoscopic work up, some of the cytological aspirations will be evaluated on site (Rapid onsite evaluation, ROSE) by a member of the pathological department and the representativeness of the samples will be reported back to the bronchoscopist. ROSE will always be performed for the first TBNA pass. For the following passes, the bronchoscopist decides if it is indicated.

### Addition of nCLE imaging (intervention group)

The same procedure will be performed as described above for the patients randomized to the intervention arm, except for the addition of fluorescein administration and nCLE imaging before TBNA. Prior to the procedure, an 18G needle is preloaded with the CLE probe (AQ-Flex™ 19 Miniprobe, Mauna Kea Technologies, Paris, France) using a locking device. The CLE probe is advanced through the needle until the probe is positioned approximately 4 mm past the needle tip. The locking device ensures the probe cannot protrude more than the specified 4 mm during the procedure.

After determining the sample location based on lesion identification with r-EBUS and/or fluoroscopy, fluorescein (2.5 mL of 10% fluoresceindinatrium solution) is administered intravenously. Then, the

1  
2  
3 preloaded 18G needle punctures the target area, followed by the insertion of the CLE probe through  
4 the biopsy needle for real-time microscopic feedback. In case nCLE visualizes airway or lung  
5 parenchyma, indicating a near-miss, the biopsy needle is fine-tuned (i.e., the needle is moved within  
6 the same distal airway) or repositioned (i.e., a different distal airway is chosen). If nCLE demonstrates  
7 that the biopsy needle is placed within the lesion, the CLE probe is removed from the biopsy needle  
8 while holding the needle in position, followed by tissue sampling at the same location (repeated for  
9 at least 3 TBNAs). A flowchart of the procedure steps for both the conventional bronchoscopy and the  
10 nCLE-guided bronchoscopy is shown in Figure 2.  
11  
12  
13  
14  
15  
16  
17

### 18 **Pathological examination**

19  
20 The cytological and histological examination will be done according to standard hospital procedure. In  
21 case the bronchoscopic procedure is considered non-diagnostic, additional procedures (transthoracic  
22 needle aspiration, surgical procedure, etc.) could follow to obtain a definite diagnosis. Results of the  
23 nCLE imaging do not influence the indication for additional diagnostic procedures. If a surgical  
24 procedure is indicated, the histological images will be collected to compare this with the nCLE imaging.  
25  
26  
27  
28  
29

30 In this study, the final pathological diagnosis will be subdivided into four categories as described by  
31 Vachani et al.,(19) namely [1] malignant, [2] non-malignant, which is divided into specific benign  
32 (including granulomatous, infectious and lymphocyte-predominant patterns) or nonspecific benign  
33 (e.g. inflammation), and [3] non-diagnostic (i.e., insufficient material for classifying diagnosis or in case  
34 atypical cells could not be classified further).  
35  
36  
37  
38  
39

### 40 **Reference standard**

41  
42 For the primary outcome, diagnostic yield will be calculated using the intermediate method described  
43 by Vachani et al.(19) The abovementioned final pathological diagnosis categories will be used  
44 regardless of the results of the reference standard, except for initial non-specific benign diagnoses. In  
45 these cases, results from the reference standard will be considered. If the initial benign diagnosis is  
46 confirmed benign in follow-up, the bronchoscopic procedure will be considered diagnostic.  
47  
48  
49

50 For the calculation of diagnostic sensitivity, malignant cases identified by the procedures under  
51 investigation will be considered as true positive since false positive results (almost) never occur.  
52 Benign (either specific or non-specific) and non-diagnostic samples will undergo a reference standard,  
53 which can be a subsequent sampling method such as transthoracic needle biopsy or surgery.  
54 Alternatively, if no subsequent sampling method is performed, clinical and radiological follow-up at 6  
55 months is considered the reference standard. If follow-up CT imaging shows regression or resolution  
56  
57  
58  
59  
60

1  
2  
3 of the nodule or in case a nodule remains stable, it will be considered as a confirmation of non-  
4 malignant diagnosis (i.e., true negative). Cases that are benign (either specific or non-specific) or non-  
5 diagnostic at the index bronchoscopy will be considered false negative if a malignancy diagnosis is  
6 established by the reference standard or if therapeutic procedures are done without confirmation of  
7 diagnosis. Figure 3 gives a schematic overview of the calculation methods of diagnostic yield and  
8 sensitivity for malignancy.  
9

### 14 **Informed consent procedure**

16 Patients will be recruited by their treating physician. If the patient is willing to receive more  
17 information about study participation, information will be provided by the local investigator. The  
18 eligible participants will have sufficient time until the scheduled procedure to consider their consent.  
19 Written informed consent must be provided before any study-related procedures take place. After  
20 informed consent, patients will be randomized using Castor EDC software and assigned to the control  
21 or intervention group. The bronchoscopy will then be performed according to the study protocol. In  
22 case patients decline participation in the study, they will be treated to the usual local clinical practices  
23 and guidelines.  
24  
25  
26  
27  
28  
29

### 31 **Quality assurance**

33 Only experienced pulmonologists will perform the procedures to ensure high-quality bronchoscopic  
34 procedures. Additionally, all participating centers will be trained in the use of the CLE Cellvizio device  
35 and to maintain homogeneous quality of the nCLE image acquisition and interpretation over all  
36 centers.  
37  
38  
39

### 42 **Sample size justification**

44 Based on previous studies and meta-analyses, we expect the diagnostic yield in patients with a lesion  
45 <30 mm in the conventional bronchoscopy arm to be 62%.<sup>(21, 22)</sup> We hypothesize that additional  
46 nCLE guidance in the intervention arm will result in a diagnostic yield of 80%. In total, 198 patients are  
47 needed to show that nCLE guidance results in a diagnostic yield that is 18 percent point higher than  
48 the conventional bronchoscopy arm ( $\alpha=0.05$  and  $\text{power}=0.80$ ). Taking into account a 5% study  
49 drop-out, a total of 208 patients will be included. We believe an increase in the diagnostic yield (from  
50 62% to 80%) demonstrates a clinically relevant improvement in lung cancer diagnosis.  
51  
52  
53  
54  
55  
56  
57  
58  
59  
60

## Data analysis

Results for continuous variables will be expressed as means and standard deviations or medians with interquartile ranges. Categorical variables will be expressed as frequencies and percentages. The Chi-squared test will be used to compare diagnostic yield (or other comparisons between categorical variables) between the two randomization groups. Continuous variables will be compared using Student's t-test, or Mann-Whitney-U tests. A two-tailed P-value <0.05 will be considered statistically significant. All analyses are done based on an intention-to-treat approach, meaning that patients are analyzed as part of the intervention group they were assigned to, even if nCLE imaging was not executed in a patient in the intervention arm due to unforeseen circumstances. These specific cases will be reported in the manuscript. Patients not undergoing the planned bronchoscopy procedure after randomization are excluded from the analysis. Patients with missing outcome data will be excluded from analysis. Patients with incomplete essential follow-up information will also be excluded from the calculation of diagnostic sensitivity. However, we will also calculate diagnostic sensitivity based on a 'worst-case scenario', in which these patients are considered false negatives. For the primary outcome, subgroup analysis will be performed for several lesions and procedural characteristics (lesion size (<20 mm vs ≥20 mm), radial EBUS image (eccentric vs concentric vs absent), location (upper lobe (without lingual) vs middle lobe/lingual vs lower lobe), pre-test probability that the nodule is cancerous (<10%, 10 – 35%, 36-70% and >70%) based on the Brock score.(23)

## Ethics and dissemination

The CLEVER study will be conducted in accordance with the Declaration of Helsinki (64th WMA General Assembly, Fortaleza, Brazil, October 2013) and the Medical Research Involving Human Subjects Act (WMO, The Netherlands) principles. The Medical Ethical Committee of the Amsterdam UMC has approved the study (NL83257.018.22). Written informed consent will be obtained prior to randomization and any study-related procedures. In case of major changes to the protocol, the ethical review board will be notified, and it will be communicated with all participating centers and registered on [clinicaltrials.gov](http://clinicaltrials.gov).

## Data management and safety

After informed consent, the patient will be given a code. This code will be used on all (pseudonymized) data, including CLE images and electronic Case Report Form (eCRF) data. Castor Electronic Data Capture ecosystem (International Organization of Standardization (ISO) 27001 and 9001 certified) will be used to collect key patient information described in outcome parameters. The key to the code is



1  
2  
3 safeguarded by the local principal investigator and access to all records is limited to directly involved  
4 researchers. The coordinating investigator will centralize patients' data, and principal investigators will  
5 have direct access to their own site's data sets and to other sites' data upon reasonable request. All  
6 principal investigators will maintain records, including signed patient informed consent forms and  
7 information on adverse events.  
8  
9  
10  
11  
12

13 Data management of all data (collection, storage, and analysis) will be done according to the local data  
14 management plan. All records will be stored for a period of 15 years following the completion or  
15 termination of the study. Monitoring will be done according to a monitoring plan with specific  
16 attention paid to informed consent, completion of the eCRF, and storage of CLE video data.  
17  
18  
19  
20  
21

## 22 **Patient safety and adverse events**

23  
24 The study was deemed a negligible risk study (according to the Nederlandse Federatie van  
25 Universitaire Medisch Centra (NFU) descriptions) by the ethical committee of the Amsterdam UMC.  
26 Previous study publications showed that nCLE-imaging and intravenous fluorescein administration are  
27 safe.(24) Fluorescein adverse reactions are rare and mostly mild in nature. No study related adverse  
28 events occurred in the prior bronchoscopic nCLE studies for peripheral lung nodule analysis in  
29 Amsterdam UMC.(16, 17) Estimated prolonged endoscopy time due to study participation is  
30 approximately 10 minutes. Patients will not be aware of this as they will already be sedated for the  
31 bronchoscopic procedure.  
32  
33  
34  
35  
36  
37  
38  
39

40 In case any (serious) adverse event ((S)AE) occur during the procedure or up to one week after the  
41 procedure, the sponsor will register SAEs through the web portal *Toetsingonline* to the accredited  
42 METC that has approved the protocol. Adverse events are defined as any undesirable experience  
43 occurring to a subject during the study, whether or not considered related to the trial procedure. The  
44 severity and possible relatedness to the investigational product or the procedure will be documented.  
45 Investigators of the participating centers will report all serious adverse events to the coordinating and  
46 principal investigator of the initiating site. Reporting of SAEs that result in death or are life-threatening  
47 will be done within 7 days after initial identification, followed by a period of a maximum of 8 days to  
48 complete the preliminary report. All other SAEs will be reported within 15 days after first knowledge  
49 of the SAE.  
50  
51  
52  
53  
54  
55  
56  
57  
58  
59  
60

## Annual progress report

The sponsor will ensure that a progress report is submitted to the medical ethics committee once a year. Information on the start date of inclusion, number of subjects included to date, number of subjects that have completed participation, serious adverse events, and amendments.

## Dissemination

We aim to publish the study results in a peer-reviewed journal. Reporting will be in line with CONSORT and STARD 2015 reporting guidelines.(25, 26)

## Discussion

In this multicenter, investigator-initiated, randomized controlled trial, we aim to determine if the addition of nCLE-imaging to bronchoscopic peripheral lung lesion analysis results in an improved diagnostic yield.

Since there still is a gap between the success rate of navigating the tissue sampling instrument toward the target lesion and the final diagnostic yield, there is a need for real-time tool-in-lesion confirmation. The addition of high-resolution microscopic nCLE imaging at the tip of the needle could potentially lead to a decrease in mispositioning rates and an improved diagnostic yield. As a result, fewer patients would need additional diagnostic procedures such as transthoracic needle biopsy or surgery, which are more invasive and have higher incidences of complications such as pneumothorax and hemorrhage.(27) Previous smaller studies have already shown that nCLE is safe, and raters can distinguish different image characteristics with high accuracy. On top of that, it has also been demonstrated that fine-tuning the needle based on these image characteristics is often done, even when navigation to the lesion was successful.(16-18)

Current literature on nCLE imaging for this purpose remains limited to smaller patient groups and the clinical benefit remains to be demonstrated. The results of the CLEVER study provide a formal comparison between conventional image-guided diagnostic bronchoscopy and conventional bronchoscopy with the addition of nCLE in a large randomized patient group. The results of this trial will clarify the added benefit of nCLE for bronchoscopic diagnosis of peripheral lung nodules and identify which patients could benefit from the use of this technique.

## Author contributions

SvH, TK, DAK, DMdB, PIB and JTA were involved in conception and trial design. SvH, TK, DAK, PIB and JTA were involved in drafting of the study protocol. DAK provided statistical expertise. All authors were involved in editing and final approval of the protocol. SvH, DG, CB, JH, MH, VP, CR, AS, GS, EK, NA, JV, ZS, MAH, JMAD, PIB and JTA will be involved in the conduct of the study and data acquisition. SvH, DAK, DMdB, PIB and JTA will be involved in the data analysis and interpretation. SvH, DAK, PIB and JTA will be involved in drafting of the final manuscript for dissemination. All authors will provide editing and approval of the final manuscript for publication.

## Funding

This is an investigator-initiated study with financial and material support from Mauna Kea Technologies (9 Rue d'Enghien, 75010 Paris, France). The funder has no role in study design, data collection and analysis, decision to publish, or preparation of the manuscript.

## Declaration of interests

JTA declares material and financial support from Mauna Kea Technologies for this study.

## Data sharing statement

The final trial dataset will be available to study investigators on completion of the trial, and after publication of the primary manuscript. Data requests can be submitted to the researchers at the Amsterdam UMC, Amsterdam, The Netherlands.

## Bibliography

1. Bade BC, Dela Cruz CS. Lung Cancer 2020: Epidemiology, Etiology, and Prevention. *Clin Chest Med.* 2020;41(1):1-24. doi:10.1016/j.ccm.2019.10.001.
2. Sung H, Ferlay J, Siegel RL, et al. Global Cancer Statistics 2020: GLOBOCAN Estimates of Incidence and Mortality Worldwide for 36 Cancers in 185 Countries. *CA: A Cancer Journal for Clinicians.* 2021;71(3):209-49. doi:10.3322/caac.21660.
3. Hoffman RM, Atallah RP, Struble RD, Badgett RG. Lung Cancer Screening with Low-Dose CT: a Meta-Analysis. *J Gen Intern Med.* 2020;35(10):3015-25. doi:10.1007/s11606-020-05951-7.
4. Hyltdgaard C, Trolle C, Harders SMW, et al. Increased use of diagnostic CT imaging increases the detection of stage IA lung cancer: pathways and patient characteristics. *BMC Cancer.* 2022;22(1):464. doi:10.1186/s12885-022-09585-2.
5. Zhang EW, Shepard JO, Kuo A, et al. Characteristics and Outcomes of Lung Cancers Detected on Low-Dose Lung Cancer Screening CT. *Cancer Epidemiol Biomarkers Prev.* 2021;30(8):1472-9. doi:10.1158/1055-9965.Epi-20-1847.

- 1  
2  
3 6. Horeweg N, van der Aalst CM, Thunnissen E, et al. Characteristics of lung cancers detected by  
4 computer tomography screening in the randomized NELSON trial. *Am J Respir Crit Care Med.*  
5 2013;187(8):848-54. doi:10.1164/rccm.201209-1651OC.
- 6 7. Kramer T, Annema JT. Advanced bronchoscopic techniques for the diagnosis and treatment of  
7 peripheral lung cancer. *Lung Cancer.* 2021;161:152-62. doi:10.1016/j.lungcan.2021.09.015.
- 8 8. Kops SEP, Heus P, Korevaar DA, et al. Diagnostic yield and safety of navigation bronchoscopy:  
9 A systematic review and meta-analysis. *Lung Cancer.* 2023;180:107196.  
10 doi:10.1016/j.lungcan.2023.107196.
- 11 9. Nadig TR, Thomas N, Nietert PJ, et al. Guided bronchoscopy for the evaluation of pulmonary  
12 lesions: An updated meta-analysis. *Chest.* 2023. doi:10.1016/j.chest.2022.12.044.
- 13 10. Chen A, Chenna P, Loiselle A, et al. Radial Probe Endobronchial Ultrasound for Peripheral  
14 Pulmonary Lesions. A 5-Year Institutional Experience. *Annals of the American Thoracic Society.*  
15 2014;11(4):578-82. doi:10.1513/AnnalsATS.201311-384OC.
- 16 11. Chen AC, Pastis NJ, Jr., Mahajan AK, et al. Robotic Bronchoscopy for Peripheral Pulmonary  
17 Lesions: A Multicenter Pilot and Feasibility Study (BENEFIT). *Chest.* 2021;159(2):845-52.  
18 doi:10.1016/j.chest.2020.08.2047.
- 19 12. Chaddha U, Kovacs SP, Manley C, et al. Robot-assisted bronchoscopy for pulmonary lesion  
20 diagnosis: results from the initial multicenter experience. *BMC Pulmonary Medicine.* 2019;19(1):243.  
21 doi:10.1186/s12890-019-1010-8.
- 22 13. Gex G, Pralong JA, Combescure C, et al. Diagnostic yield and safety of electromagnetic  
23 navigation bronchoscopy for lung nodules: a systematic review and meta-analysis. *Respiration.*  
24 2014;87(2):165-76. doi:10.1159/000355710.
- 25 14. Fugazza A, Gaiani F, Carra MC, et al. Confocal Laser Endomicroscopy in Gastrointestinal and  
26 Pancreatobiliary Diseases: A Systematic Review and Meta-Analysis. *Biomed Res Int.*  
27 2016;2016:4638683. doi:10.1155/2016/4638683.
- 28 15. Goorsenberg A, Kalverda KA, Annema J, Bonta P. Advances in Optical Coherence Tomography  
29 and Confocal Laser Endomicroscopy in Pulmonary Diseases. *Respiration.* 2020;99(3):190-205.  
30 doi:10.1159/000503261.
- 31 16. Kramer T, Wijmans L, de Bruin M, et al. Bronchoscopic needle-based confocal laser  
32 endomicroscopy (nCLE) as a real-time detection tool for peripheral lung cancer. *Thorax.*  
33 2022;77(4):370-7. doi:10.1136/thoraxjnl-2021-216885.
- 34 17. Wijmans L, Yared J, de Bruin DM, et al. Needle-based confocal laser endomicroscopy for real-  
35 time diagnosing and staging of lung cancer. *Eur Respir J.* 2019;53(6). doi:10.1183/13993003.01520-  
36 2018.
- 37 18. Manley CJ, Kramer T, Kumar R, et al. Robotic bronchoscopic needle-based confocal laser  
38 endomicroscopy to diagnose peripheral lung nodules. *Respirology.* 2022. doi:10.1111/resp.14438.
- 39 19. Vachani A, Maldonado F, Laxmanan B, et al. The Impact of Alternative Approaches to  
40 Diagnostic Yield Calculation in Studies of Bronchoscopy. *Chest.* 2022;161(5):1426-8.  
41 doi:10.1016/j.chest.2021.08.074.
- 42 20. Chauhan SS, Abu Dayyeh BK, Bhat YM, et al. Confocal laser endomicroscopy. *Gastrointestinal*  
43 *Endoscopy.* 2014;80(6):928-38. doi:10.1016/j.gie.2014.06.021.
- 44 21. Ali MS, Trick W, Mba BI, et al. Radial endobronchial ultrasound for the diagnosis of peripheral  
45 pulmonary lesions: A systematic review and meta-analysis. *Respirology.* 2017;22(3):443-53.  
46 doi:10.1111/resp.12980.
- 47 22. Lee J, Song JU. Diagnostic yield of radial probe endobronchial ultrasonography-guided  
48 transbronchial biopsy without fluoroscopy in peripheral pulmonary lesions: A systematic review and  
49 meta-analysis. *Thorac Cancer.* 2023;14(2):195-205. doi:10.1111/1759-7714.14733.
- 50 23. McWilliams A, Tammemagi MC, Mayo JR, et al. Probability of cancer in pulmonary nodules  
51 detected on first screening CT. *N Engl J Med.* 2013;369(10):910-9. doi:10.1056/NEJMoa1214726.
- 52  
53  
54  
55  
56  
57  
58  
59  
60

- 1  
2  
3 24. Wallace MB, Meining A, Canto MI, et al. The safety of intravenous fluorescein for confocal  
4 laser endomicroscopy in the gastrointestinal tract. *Aliment Pharmacol Ther.* 2010;31(5):548-52.  
5 doi:10.1111/j.1365-2036.2009.04207.x.  
6  
7 25. Bossuyt PM, Reitsma JB, Bruns DE, et al. STARD 2015: an updated list of essential items for  
8 reporting diagnostic accuracy studies. *Bmj.* 2015;351:h5527. doi:10.1136/bmj.h5527.  
9  
10 26. Schulz KF, Altman DG, Moher D. CONSORT 2010 statement: updated guidelines for reporting  
11 parallel group randomised trials. *Bmj.* 2010;340:c332. doi:10.1136/bmj.c332.  
12  
13 27. Ho ATN, Gorthi R, Lee R, et al. Solitary Lung Nodule: CT-Guided Transthoracic Biopsy vs  
14 Transbronchial Biopsy With Endobronchial Ultrasound and Flexible Bronchoscope, a Meta-Analysis of  
15 Randomized Controlled Trials. *Lung.* 2023. doi:10.1007/s00408-023-00596-9.  
16  
17  
18  
19  
20  
21  
22  
23  
24  
25  
26  
27  
28  
29  
30  
31  
32  
33  
34  
35  
36  
37  
38  
39  
40  
41  
42  
43  
44  
45  
46  
47  
48  
49  
50  
51  
52  
53  
54  
55  
56  
57  
58  
59  
60

For peer review only

## Figure headings

Figure 1: Study flowchart. r-EBUS: radial endobronchial ultrasound; EMN: electromagnetic navigation; VB: virtual bronchoscopy; nCLE: needle-based confocal laser endomicroscopy; TBNA: transbronchial needle aspiration; PET: positron emission tomography; CT: computed tomography

Figure 2: Procedure flowchart for control and interventional group (without and with nCLE). Note: fluorescein administration is only done once before the first puncture. TBNA: transbronchial needle aspiration; ROSE: rapid on-site evaluation; EBUS: endobronchial ultrasound; EMN: electromagnetic navigation; VB: virtual bronchoscopy; nCLE: needle-based confocal laser endomicroscopy

Figure 3: Flowchart explaining calculation methods of diagnostic yield and sensitivity of malignancy. SPB: specific benign; NSB: non-specific benign; ND: non-diagnostic; TP: true positive; TN: true negative; FN: false negative; CT: computed tomography

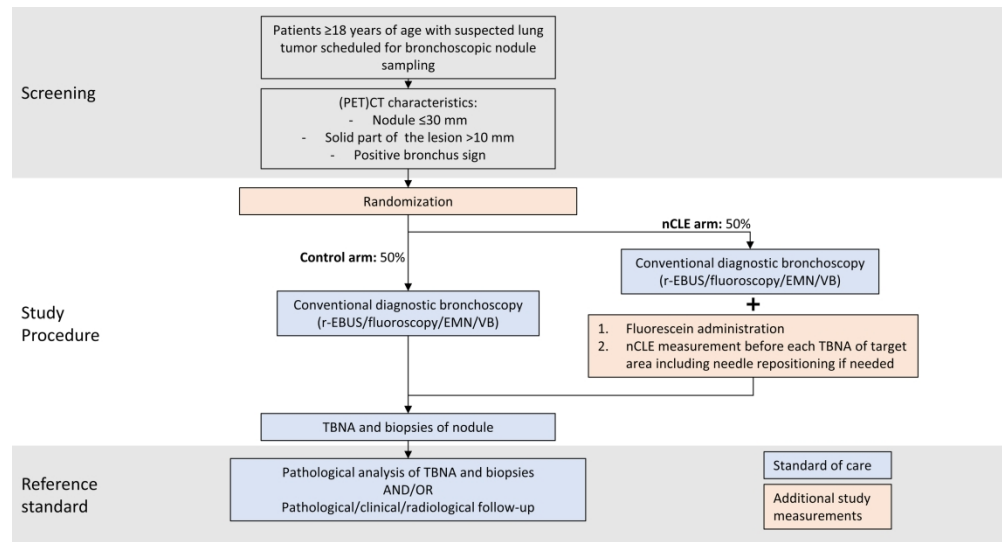

24 Figure 1: Study flowchart. r-EBUS: radial endobronchial ultrasound; EMN: electromagnetic navigation; VB: virtual bronchoscopy; nCLE: needle-based confocal laser endomicroscopy; TBNA: transbronchial needle aspiration; PET: positron emission tomography; CT: computed tomography

27 275x147mm (300 x 300 DPI)

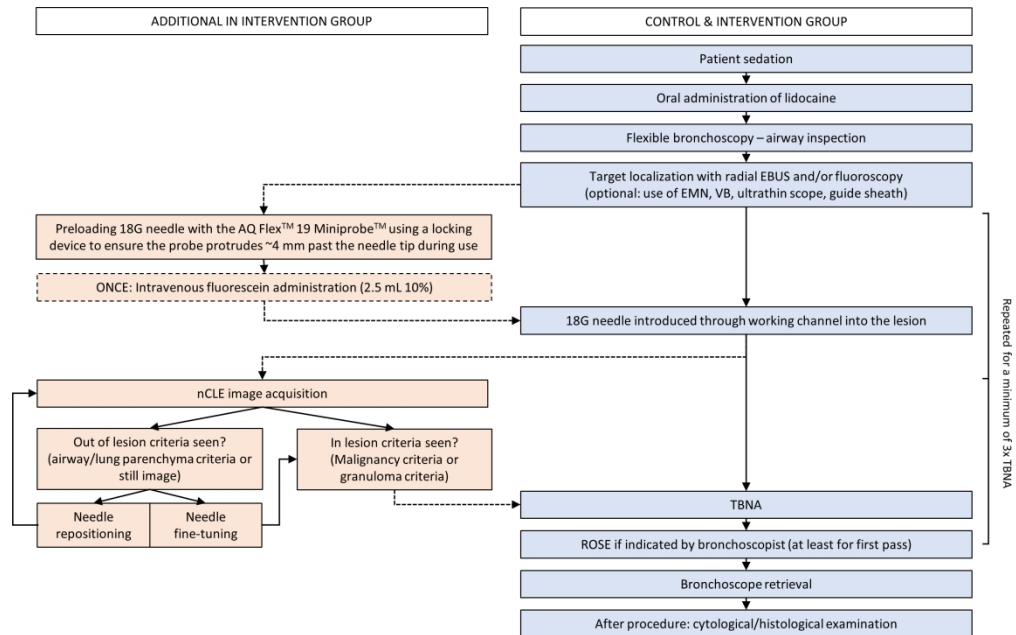

Figure 2: Procedure flowchart for control and interventional group (without and with nCLE). Note: fluorescein administration is only done once before the first puncture. TBNA: transbronchial needle aspiration; ROSE: rapid on-site evaluation; EBUS: endobronchial ultrasound; EMN: electromagnetic navigation; VB: virtual bronchoscopy; nCLE: needle-based confocal laser endomicroscopy

246x155mm (300 x 300 DPI)



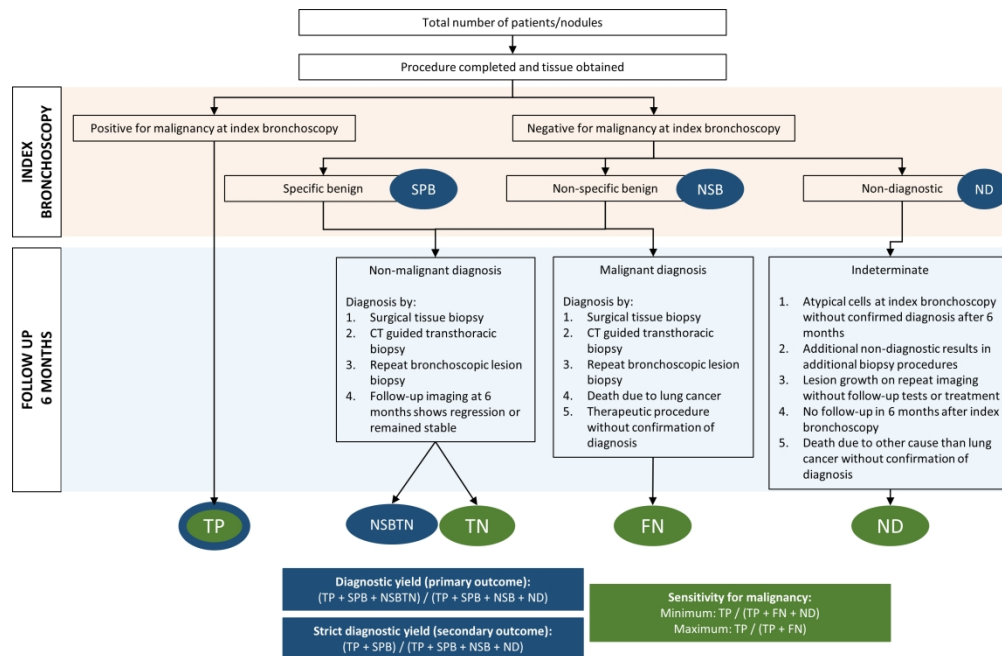

Figure 3: Flowchart explaining calculation methods of diagnostic yield and sensitivity of malignancy. SPB: specific benign; NSB: non-specific benign; ND: non-diagnostic; TP: true positive; TN: true negative; FN: false negative; CT: computed tomography

262x170mm (300 x 300 DPI)

# Reporting checklist for protocol of a clinical trial.

Based on the SPIRIT guidelines.

## Instructions to authors

Complete this checklist by entering the page numbers from your manuscript where readers will find each of the items listed below.

Your article may not currently address all the items on the checklist. Please modify your text to include the missing information. If you are certain that an item does not apply, please write "n/a" and provide a short explanation.

Upload your completed checklist as an extra file when you submit to a journal.

In your methods section, say that you used the SPIRIT reporting guidelines, and cite them as:

Chan A-W, Tetzlaff JM, Gøtzsche PC, Altman DG, Mann H, Berlin J, Dickersin K, Hróbjartsson A, Schulz KF, Parulekar WR, Krleža-Jerić K, Laupacis A, Moher D. SPIRIT 2013 Explanation and Elaboration: Guidance for protocols of clinical trials. *BMJ*. 2013;346:e7586

|                                             |                     | Reporting Item                                                                                               | Page Number |
|---------------------------------------------|---------------------|--------------------------------------------------------------------------------------------------------------|-------------|
| <b>Administrative information</b>           |                     |                                                                                                              |             |
| Title                                       | <a href="#">#1</a>  | Descriptive title identifying the study design, population, interventions, and, if applicable, trial acronym | 1           |
| Trial registration                          | <a href="#">#2a</a> | Trial identifier and registry name. If not yet registered, name of intended registry                         | 2           |
| Trial registration: data set                | <a href="#">#2b</a> | All items from the World Health Organization Trial Registration Data Set                                     | NA          |
| Protocol version                            | <a href="#">#3</a>  | Date and version identifier                                                                                  | NA          |
| Funding                                     | <a href="#">#4</a>  | Sources and types of financial, material, and other support                                                  | 15          |
| Roles and responsibilities: contributorship | <a href="#">#5a</a> | Names, affiliations, and roles of protocol contributors                                                      | 1 and 14    |

|    |                           |                     |                                                          |           |
|----|---------------------------|---------------------|----------------------------------------------------------|-----------|
| 1  | Roles and                 | <a href="#">#5b</a> | Name and contact information for the trial sponsor       | 1 and 14  |
| 2  | responsibilities:         |                     |                                                          |           |
| 3  | sponsor contact           |                     |                                                          |           |
| 4  | information               |                     |                                                          |           |
| 5  |                           |                     |                                                          |           |
| 6  |                           |                     |                                                          |           |
| 7  |                           |                     |                                                          |           |
| 8  | Roles and                 | <a href="#">#5c</a> | Role of study sponsor and funders, if any, in study      | 1, 14, 15 |
| 9  | responsibilities:         |                     | design; collection, management, analysis, and            |           |
| 10 | sponsor and funder        |                     | interpretation of data; writing of the report; and the   |           |
| 11 |                           |                     | decision to submit the report for publication, including |           |
| 12 |                           |                     | whether they will have ultimate authority over any of    |           |
| 13 |                           |                     | these activities                                         |           |
| 14 |                           |                     |                                                          |           |
| 15 |                           |                     |                                                          |           |
| 16 |                           |                     |                                                          |           |
| 17 | Roles and                 | <a href="#">#5d</a> | Composition, roles, and responsibilities of the          | NA        |
| 18 | responsibilities:         |                     | coordinating centre, steering committee, endpoint        |           |
| 19 | committees                |                     | adjudication committee, data management team, and        |           |
| 20 |                           |                     | other individuals or groups overseeing the trial, if     |           |
| 21 |                           |                     | applicable (see Item 21a for data monitoring committee)  |           |
| 22 |                           |                     |                                                          |           |
| 23 |                           |                     |                                                          |           |
| 24 |                           |                     |                                                          |           |
| 25 |                           |                     |                                                          |           |
| 26 | <b>Introduction</b>       |                     |                                                          |           |
| 27 |                           |                     |                                                          |           |
| 28 | Background and            | <a href="#">#6a</a> | Description of research question and justification for   | 3         |
| 29 | rationale                 |                     | undertaking the trial, including summary of relevant     |           |
| 30 |                           |                     | studies (published and unpublished) examining benefits   |           |
| 31 |                           |                     | and harms for each intervention                          |           |
| 32 |                           |                     |                                                          |           |
| 33 |                           |                     |                                                          |           |
| 34 |                           |                     |                                                          |           |
| 35 | Background and            | <a href="#">#6b</a> | Explanation for choice of comparators                    | 3         |
| 36 | rationale: choice of      |                     |                                                          |           |
| 37 | comparators               |                     |                                                          |           |
| 38 |                           |                     |                                                          |           |
| 39 |                           |                     |                                                          |           |
| 40 | Objectives                | <a href="#">#7</a>  | Specific objectives or hypotheses                        | 4         |
| 41 |                           |                     |                                                          |           |
| 42 |                           |                     |                                                          |           |
| 43 | Trial design              | <a href="#">#8</a>  | Description of trial design including type of trial (eg, | 4         |
| 44 |                           |                     | parallel group, crossover, factorial, single group),     |           |
| 45 |                           |                     | allocation ratio, and framework (eg, superiority,        |           |
| 46 |                           |                     | equivalence, non-inferiority, exploratory)               |           |
| 47 |                           |                     |                                                          |           |
| 48 |                           |                     |                                                          |           |
| 49 | <b>Methods:</b>           |                     |                                                          |           |
| 50 | <b>Participants,</b>      |                     |                                                          |           |
| 51 | <b>interventions, and</b> |                     |                                                          |           |
| 52 | <b>outcomes</b>           |                     |                                                          |           |
| 53 |                           |                     |                                                          |           |
| 54 |                           |                     |                                                          |           |
| 55 |                           |                     |                                                          |           |
| 56 | Study setting             | <a href="#">#9</a>  | Description of study settings (eg, community clinic,     | 4         |
| 57 |                           |                     | academic hospital) and list of countries where data will |           |
| 58 |                           |                     |                                                          |           |
| 59 |                           |                     |                                                          |           |
| 60 |                           |                     |                                                          |           |

be collected. Reference to where list of study sites can be obtained

|    |                      |                      |                                                                                                                                                                                                                                                                                                                                                                                |
|----|----------------------|----------------------|--------------------------------------------------------------------------------------------------------------------------------------------------------------------------------------------------------------------------------------------------------------------------------------------------------------------------------------------------------------------------------|
| 1  |                      |                      |                                                                                                                                                                                                                                                                                                                                                                                |
| 2  |                      |                      |                                                                                                                                                                                                                                                                                                                                                                                |
| 3  |                      |                      |                                                                                                                                                                                                                                                                                                                                                                                |
| 4  | Eligibility criteria | <a href="#">#10</a>  | Inclusion and exclusion criteria for participants. If applicable, eligibility criteria for study centres and individuals who will perform the interventions (eg, surgeons, psychotherapists)                                                                                                                                                                                   |
| 5  |                      |                      | 5,6                                                                                                                                                                                                                                                                                                                                                                            |
| 6  |                      |                      |                                                                                                                                                                                                                                                                                                                                                                                |
| 7  |                      |                      |                                                                                                                                                                                                                                                                                                                                                                                |
| 8  |                      |                      |                                                                                                                                                                                                                                                                                                                                                                                |
| 9  |                      |                      |                                                                                                                                                                                                                                                                                                                                                                                |
| 10 |                      |                      |                                                                                                                                                                                                                                                                                                                                                                                |
| 11 | Interventions:       | <a href="#">#11a</a> | Interventions for each group with sufficient detail to allow replication, including how and when they will be administered                                                                                                                                                                                                                                                     |
| 12 | description          |                      | 9,10                                                                                                                                                                                                                                                                                                                                                                           |
| 13 |                      |                      |                                                                                                                                                                                                                                                                                                                                                                                |
| 14 |                      |                      |                                                                                                                                                                                                                                                                                                                                                                                |
| 15 |                      |                      |                                                                                                                                                                                                                                                                                                                                                                                |
| 16 | Interventions:       | <a href="#">#11b</a> | Criteria for discontinuing or modifying allocated interventions for a given trial participant (eg, drug dose change in response to harms, participant request, or improving / worsening disease)                                                                                                                                                                               |
| 17 | modifications        |                      | NA                                                                                                                                                                                                                                                                                                                                                                             |
| 18 |                      |                      |                                                                                                                                                                                                                                                                                                                                                                                |
| 19 |                      |                      |                                                                                                                                                                                                                                                                                                                                                                                |
| 20 |                      |                      |                                                                                                                                                                                                                                                                                                                                                                                |
| 21 |                      |                      |                                                                                                                                                                                                                                                                                                                                                                                |
| 22 |                      |                      |                                                                                                                                                                                                                                                                                                                                                                                |
| 23 | Interventions:       | <a href="#">#11c</a> | Strategies to improve adherence to intervention protocols, and any procedures for monitoring adherence (eg, drug tablet return; laboratory tests)                                                                                                                                                                                                                              |
| 24 | adherence            |                      | 11                                                                                                                                                                                                                                                                                                                                                                             |
| 25 |                      |                      |                                                                                                                                                                                                                                                                                                                                                                                |
| 26 |                      |                      |                                                                                                                                                                                                                                                                                                                                                                                |
| 27 |                      |                      |                                                                                                                                                                                                                                                                                                                                                                                |
| 28 | Interventions:       | <a href="#">#11d</a> | Relevant concomitant care and interventions that are permitted or prohibited during the trial                                                                                                                                                                                                                                                                                  |
| 29 | concomitant care     |                      | 9, 10                                                                                                                                                                                                                                                                                                                                                                          |
| 30 |                      |                      |                                                                                                                                                                                                                                                                                                                                                                                |
| 31 |                      |                      |                                                                                                                                                                                                                                                                                                                                                                                |
| 32 | Outcomes             | <a href="#">#12</a>  | Primary, secondary, and other outcomes, including the specific measurement variable (eg, systolic blood pressure), analysis metric (eg, change from baseline, final value, time to event), method of aggregation (eg, median, proportion), and time point for each outcome. Explanation of the clinical relevance of chosen efficacy and harm outcomes is strongly recommended |
| 33 |                      |                      | 6,7                                                                                                                                                                                                                                                                                                                                                                            |
| 34 |                      |                      |                                                                                                                                                                                                                                                                                                                                                                                |
| 35 |                      |                      |                                                                                                                                                                                                                                                                                                                                                                                |
| 36 |                      |                      |                                                                                                                                                                                                                                                                                                                                                                                |
| 37 |                      |                      |                                                                                                                                                                                                                                                                                                                                                                                |
| 38 |                      |                      |                                                                                                                                                                                                                                                                                                                                                                                |
| 39 |                      |                      |                                                                                                                                                                                                                                                                                                                                                                                |
| 40 |                      |                      |                                                                                                                                                                                                                                                                                                                                                                                |
| 41 |                      |                      |                                                                                                                                                                                                                                                                                                                                                                                |
| 42 |                      |                      |                                                                                                                                                                                                                                                                                                                                                                                |
| 43 | Participant timeline | <a href="#">#13</a>  | Time schedule of enrolment, interventions (including any run-ins and washouts), assessments, and visits for participants. A schematic diagram is highly recommended (see Figure)                                                                                                                                                                                               |
| 44 |                      |                      | 9,10,11                                                                                                                                                                                                                                                                                                                                                                        |
| 45 |                      |                      |                                                                                                                                                                                                                                                                                                                                                                                |
| 46 |                      |                      |                                                                                                                                                                                                                                                                                                                                                                                |
| 47 |                      |                      |                                                                                                                                                                                                                                                                                                                                                                                |
| 48 |                      |                      |                                                                                                                                                                                                                                                                                                                                                                                |
| 49 |                      |                      |                                                                                                                                                                                                                                                                                                                                                                                |
| 50 | Sample size          | <a href="#">#14</a>  | Estimated number of participants needed to achieve study objectives and how it was determined, including clinical and statistical assumptions supporting any sample size calculations                                                                                                                                                                                          |
| 51 |                      |                      | 11                                                                                                                                                                                                                                                                                                                                                                             |
| 52 |                      |                      |                                                                                                                                                                                                                                                                                                                                                                                |
| 53 |                      |                      |                                                                                                                                                                                                                                                                                                                                                                                |
| 54 |                      |                      |                                                                                                                                                                                                                                                                                                                                                                                |
| 55 |                      |                      |                                                                                                                                                                                                                                                                                                                                                                                |
| 56 |                      |                      |                                                                                                                                                                                                                                                                                                                                                                                |
| 57 | Recruitment          | <a href="#">#15</a>  | Strategies for achieving adequate participant enrolment to reach target sample size                                                                                                                                                                                                                                                                                            |
| 58 |                      |                      | 11                                                                                                                                                                                                                                                                                                                                                                             |
| 59 |                      |                      |                                                                                                                                                                                                                                                                                                                                                                                |
| 60 |                      |                      |                                                                                                                                                                                                                                                                                                                                                                                |

1 **Methods:**

2 **Assignment of**  
3 **interventions (for**  
4 **controlled trials)**  
5  
6

|    |                      |                      |                                                           |     |
|----|----------------------|----------------------|-----------------------------------------------------------|-----|
| 7  |                      |                      |                                                           |     |
| 8  | Allocation: sequence | <a href="#">#16a</a> | Method of generating the allocation sequence (eg,         | 4,5 |
| 9  | generation           |                      | computer-generated random numbers), and list of any       |     |
| 10 |                      |                      | factors for stratification. To reduce predictability of a |     |
| 11 |                      |                      | random sequence, details of any planned restriction (eg,  |     |
| 12 |                      |                      | blocking) should be provided in a separate document       |     |
| 13 |                      |                      | that is unavailable to those who enrol participants or    |     |
| 14 |                      |                      | assign interventions                                      |     |
| 15 |                      |                      |                                                           |     |
| 16 |                      |                      |                                                           |     |
| 17 |                      |                      |                                                           |     |
| 18 |                      |                      |                                                           |     |
| 19 | Allocation           | <a href="#">#16b</a> | Mechanism of implementing the allocation sequence         | 4,5 |
| 20 | concealment          |                      | (eg, central telephone; sequentially numbered, opaque,    |     |
| 21 | mechanism            |                      | sealed envelopes), describing any steps to conceal the    |     |
| 22 |                      |                      | sequence until interventions are assigned                 |     |
| 23 |                      |                      |                                                           |     |
| 24 |                      |                      |                                                           |     |
| 25 |                      |                      |                                                           |     |
| 26 | Allocation:          | <a href="#">#16c</a> | Who will generate the allocation sequence, who will       | 4,5 |
| 27 | implementation       |                      | enrol participants, and who will assign participants to   |     |
| 28 |                      |                      | interventions                                             |     |
| 29 |                      |                      |                                                           |     |
| 30 |                      |                      |                                                           |     |
| 31 | Blinding (masking)   | <a href="#">#17a</a> | Who will be blinded after assignment to interventions     | 4,5 |
| 32 |                      |                      | (eg, trial participants, care providers, outcome          |     |
| 33 |                      |                      | assessors, data analysts), and how                        |     |
| 34 |                      |                      |                                                           |     |
| 35 |                      |                      |                                                           |     |
| 36 | Blinding (masking):  | <a href="#">#17b</a> | If blinded, circumstances under which unblinding is       | NA  |
| 37 | emergency unblinding |                      | permissible, and procedure for revealing a participant's  |     |
| 38 |                      |                      | allocated intervention during the trial                   |     |
| 39 |                      |                      |                                                           |     |
| 40 |                      |                      |                                                           |     |

41 **Methods: Data**  
42 **collection,**  
43 **management, and**  
44 **analysis**  
45  
46  
47

|    |                      |                      |                                                             |       |
|----|----------------------|----------------------|-------------------------------------------------------------|-------|
| 48 |                      |                      |                                                             |       |
| 49 | Data collection plan | <a href="#">#18a</a> | Plans for assessment and collection of outcome,             | 7, 11 |
| 50 |                      |                      | baseline, and other trial data, including any related       |       |
| 51 |                      |                      | processes to promote data quality (eg, duplicate            |       |
| 52 |                      |                      | measurements, training of assessors) and a description      |       |
| 53 |                      |                      | of study instruments (eg, questionnaires, laboratory        |       |
| 54 |                      |                      | tests) along with their reliability and validity, if known. |       |
| 55 |                      |                      |                                                             |       |
| 56 |                      |                      |                                                             |       |
| 57 |                      |                      |                                                             |       |
| 58 |                      |                      |                                                             |       |
| 59 |                      |                      |                                                             |       |

Reference to where data collection forms can be found, if not in the protocol

|    |                            |                      |                                                             |
|----|----------------------------|----------------------|-------------------------------------------------------------|
| 1  |                            |                      |                                                             |
| 2  |                            |                      |                                                             |
| 3  |                            |                      |                                                             |
| 4  | Data collection plan:      | <a href="#">#18b</a> | Plans to promote participant retention and complete         |
| 5  | retention                  |                      | follow-up, including list of any outcome data to be         |
| 6  |                            |                      | collected for participants who discontinue or deviate       |
| 7  |                            |                      | from intervention protocols                                 |
| 8  |                            |                      |                                                             |
| 9  |                            |                      |                                                             |
| 10 | Data management            | <a href="#">#19</a>  | Plans for data entry, coding, security, and storage,        |
| 11 |                            |                      | including any related processes to promote data quality     |
| 12 |                            |                      | (eg, double data entry; range checks for data values).      |
| 13 |                            |                      | Reference to where details of data management               |
| 14 |                            |                      | procedures can be found, if not in the protocol             |
| 15 |                            |                      |                                                             |
| 16 |                            |                      |                                                             |
| 17 |                            |                      |                                                             |
| 18 |                            |                      |                                                             |
| 19 | Statistics: outcomes       | <a href="#">#20a</a> | Statistical methods for analysing primary and secondary     |
| 20 |                            |                      | outcomes. Reference to where other details of the           |
| 21 |                            |                      | statistical analysis plan can be found, if not in the       |
| 22 |                            |                      | protocol                                                    |
| 23 |                            |                      |                                                             |
| 24 |                            |                      |                                                             |
| 25 |                            |                      |                                                             |
| 26 | Statistics: additional     | <a href="#">#20b</a> | Methods for any additional analyses (eg, subgroup and       |
| 27 | analyses                   |                      | adjusted analyses)                                          |
| 28 |                            |                      |                                                             |
| 29 |                            |                      |                                                             |
| 30 | Statistics: analysis       | <a href="#">#20c</a> | Definition of analysis population relating to protocol non- |
| 31 | population and             |                      | adherence (eg, as randomised analysis), and any             |
| 32 | missing data               |                      | statistical methods to handle missing data (eg, multiple    |
| 33 |                            |                      | imputation)                                                 |
| 34 |                            |                      |                                                             |
| 35 |                            |                      |                                                             |
| 36 | <b>Methods: Monitoring</b> |                      |                                                             |
| 37 |                            |                      |                                                             |
| 38 |                            |                      |                                                             |
| 39 | Data monitoring:           | <a href="#">#21a</a> | Composition of data monitoring committee (DMC);             |
| 40 | formal committee           |                      | summary of its role and reporting structure; statement of   |
| 41 |                            |                      | whether it is independent from the sponsor and              |
| 42 |                            |                      | competing interests; and reference to where further         |
| 43 |                            |                      | details about its charter can be found, if not in the       |
| 44 |                            |                      | protocol. Alternatively, an explanation of why a DMC is     |
| 45 |                            |                      | not needed                                                  |
| 46 |                            |                      |                                                             |
| 47 |                            |                      |                                                             |
| 48 |                            |                      |                                                             |
| 49 |                            |                      |                                                             |
| 50 | Data monitoring:           | <a href="#">#21b</a> | Description of any interim analyses and stopping            |
| 51 | interim analysis           |                      | guidelines, including who will have access to these         |
| 52 |                            |                      | interim results and make the final decision to terminate    |
| 53 |                            |                      | the trial                                                   |
| 54 |                            |                      |                                                             |
| 55 |                            |                      |                                                             |
| 56 |                            |                      |                                                             |
| 57 | Harms                      | <a href="#">#22</a>  | Plans for collecting, assessing, reporting, and managing    |
| 58 |                            |                      | solicited and spontaneously reported adverse events         |
| 59 |                            |                      |                                                             |
| 60 |                            |                      |                                                             |

and other unintended effects of trial interventions or trial conduct

Auditing [#23](#) Frequency and procedures for auditing trial conduct, if any, and whether the process will be independent from investigators and the sponsor NA

## Ethics and dissemination

Research ethics approval [#24](#) Plans for seeking research ethics committee / institutional review board (REC / IRB) approval 12

Protocol amendments [#25](#) Plans for communicating important protocol modifications (eg, changes to eligibility criteria, outcomes, analyses) to relevant parties (eg, investigators, REC / IRBs, trial participants, trial registries, journals, regulators) 13

Consent or assent [#26a](#) Who will obtain informed consent or assent from potential trial participants or authorised surrogates, and how (see Item 32) 11

Consent or assent: ancillary studies [#26b](#) Additional consent provisions for collection and use of participant data and biological specimens in ancillary studies, if applicable NA

Confidentiality [#27](#) How personal information about potential and enrolled participants will be collected, shared, and maintained in order to protect confidentiality before, during, and after the trial 12, 13

Declaration of interests [#28](#) Financial and other competing interests for principal investigators for the overall trial and each study site 15

Data access [#29](#) Statement of who will have access to the final trial dataset, and disclosure of contractual agreements that limit such access for investigators 15

Ancillary and post trial care [#30](#) Provisions, if any, for ancillary and post-trial care, and for compensation to those who suffer harm from trial participation NA

Dissemination policy: trial results [#31a](#) Plans for investigators and sponsor to communicate trial results to participants, healthcare professionals, the

public, and other relevant groups (eg, via publication, reporting in results databases, or other data sharing arrangements), including any publication restrictions

|    |                       |                      |                                                           |
|----|-----------------------|----------------------|-----------------------------------------------------------|
| 1  |                       |                      |                                                           |
| 2  |                       |                      |                                                           |
| 3  |                       |                      |                                                           |
| 4  |                       |                      |                                                           |
| 5  | Dissemination policy: | <a href="#">#31b</a> | Authorship eligibility guidelines and any intended use of |
| 6  | authorship            |                      | professional writers                                      |
| 7  |                       |                      |                                                           |
| 8  |                       |                      |                                                           |
| 9  | Dissemination policy: | <a href="#">#31c</a> | Plans, if any, for granting public access to the full     |
| 10 | reproducible research |                      | protocol, participant-level dataset, and statistical code |
| 11 |                       |                      |                                                           |
| 12 |                       |                      |                                                           |

## 13 Appendices

|    |                      |                     |                                                               |
|----|----------------------|---------------------|---------------------------------------------------------------|
| 14 |                      |                     |                                                               |
| 15 | Informed consent     | <a href="#">#32</a> | Model consent form and other related documentation            |
| 16 | materials            |                     | given to participants and authorised surrogates               |
| 17 |                      |                     |                                                               |
| 18 |                      |                     |                                                               |
| 19 | Biological specimens | <a href="#">#33</a> | Plans for collection, laboratory evaluation, and storage      |
| 20 |                      |                     | of biological specimens for genetic or molecular analysis     |
| 21 |                      |                     | in the current trial and for future use in ancillary studies, |
| 22 |                      |                     | if applicable                                                 |
| 23 |                      |                     |                                                               |
| 24 |                      |                     |                                                               |
| 25 |                      |                     |                                                               |

26 The SPIRIT Explanation and Elaboration paper is distributed under the terms of the Creative  
 27 Commons Attribution License CC-BY-NC. This checklist was completed on 19. October 2023 using  
 28 <https://www.goodreports.org/>, a tool made by the [EQUATOR Network](#) in collaboration with  
 29 [Penelope.ai](#)  
 30  
 31  
 32  
 33  
 34  
 35  
 36  
 37  
 38  
 39  
 40  
 41  
 42  
 43  
 44  
 45  
 46  
 47  
 48  
 49  
 50  
 51  
 52  
 53  
 54  
 55  
 56  
 57  
 58  
 59  
 60



# BMJ Open

## Bronchoscopy with and without needle-based confocal laser endomicroscopy for peripheral lung nodule diagnosis: protocol for a multicenter randomized controlled trial (CLEVER trial)

|                               |                                                                                                                                                                                                                                                                                                                                                                                                                                                                                                                                                                                                                                                                                                                                                                                                                                                                                                                                                                                                                                                                                                                                                                                                                                                                                                                                                                                                                                                                                                                                                                                                                                                                                                                                                                                                                                                                                                                                                                                                                                                                                                                                                                                                                       |
|-------------------------------|-----------------------------------------------------------------------------------------------------------------------------------------------------------------------------------------------------------------------------------------------------------------------------------------------------------------------------------------------------------------------------------------------------------------------------------------------------------------------------------------------------------------------------------------------------------------------------------------------------------------------------------------------------------------------------------------------------------------------------------------------------------------------------------------------------------------------------------------------------------------------------------------------------------------------------------------------------------------------------------------------------------------------------------------------------------------------------------------------------------------------------------------------------------------------------------------------------------------------------------------------------------------------------------------------------------------------------------------------------------------------------------------------------------------------------------------------------------------------------------------------------------------------------------------------------------------------------------------------------------------------------------------------------------------------------------------------------------------------------------------------------------------------------------------------------------------------------------------------------------------------------------------------------------------------------------------------------------------------------------------------------------------------------------------------------------------------------------------------------------------------------------------------------------------------------------------------------------------------|
| Journal:                      | <i>BMJ Open</i>                                                                                                                                                                                                                                                                                                                                                                                                                                                                                                                                                                                                                                                                                                                                                                                                                                                                                                                                                                                                                                                                                                                                                                                                                                                                                                                                                                                                                                                                                                                                                                                                                                                                                                                                                                                                                                                                                                                                                                                                                                                                                                                                                                                                       |
| Manuscript ID                 | bmjopen-2023-081148.R1                                                                                                                                                                                                                                                                                                                                                                                                                                                                                                                                                                                                                                                                                                                                                                                                                                                                                                                                                                                                                                                                                                                                                                                                                                                                                                                                                                                                                                                                                                                                                                                                                                                                                                                                                                                                                                                                                                                                                                                                                                                                                                                                                                                                |
| Article Type:                 | Protocol                                                                                                                                                                                                                                                                                                                                                                                                                                                                                                                                                                                                                                                                                                                                                                                                                                                                                                                                                                                                                                                                                                                                                                                                                                                                                                                                                                                                                                                                                                                                                                                                                                                                                                                                                                                                                                                                                                                                                                                                                                                                                                                                                                                                              |
| Date Submitted by the Author: | 17-Jan-2024                                                                                                                                                                                                                                                                                                                                                                                                                                                                                                                                                                                                                                                                                                                                                                                                                                                                                                                                                                                                                                                                                                                                                                                                                                                                                                                                                                                                                                                                                                                                                                                                                                                                                                                                                                                                                                                                                                                                                                                                                                                                                                                                                                                                           |
| Complete List of Authors:     | <p>van Heumen, Saskia; Amsterdam Universitair Medische Centra, Department of Respiratory Medicine</p> <p>Kramer, Tess; Amsterdam Universitair Medische Centra, Department of Respiratory Medicine</p> <p>Korevaar, Daniël; Amsterdam Universitair Medische Centra, Department of Respiratory Medicine</p> <p>Gompelmann, Daniela; Medical University of Vienna, Department of Internal Medicine II, Division of Pulmonology</p> <p>Bal, Christina; Medical University of Vienna, Department of Internal Medicine II, Division of Pulmonology</p> <p>Hetzel, Juergen; Kantonsspital Winterthur, Department of Internal Medicine, Division of Pneumology</p> <p>Haentschel, Maik; Kantonsspital Winterthur, Department of Internal Medicine, Division of Pneumology</p> <p>Poletti, V; Morgagni-Pierantoni Hospital, Department of Thoracic Diseases Ravaglia , Claudia; Morgagni-Pierantoni Hospital, Department of Thoracic Diseases, G.B. Morgagni Hospital and University of Bologna, Forli, Italy</p> <p>Sadoughi, Ali; Montefiore Medical Center Einstein Campus, Department of Pulmonary Medicine</p> <p>Stratakos, Grigoris; National and Kapodistrian University of Athens, 1st Respiratory Medicine Department of the National Kapodistrian University of Athens</p> <p>Koukaki, Evangelia; National and Kapodistrian University of Athens, 1st Respiratory Medicine Department of the National Kapodistrian University of Athens</p> <p>Anagnostopoulos, Nektarios; National and Kapodistrian University of Athens, 1st Respiratory Medicine Department of the National Kapodistrian University of Athens</p> <p>Votruba, Jiří; General University Hospital in Prague, 1st Department of Tuberculosis and Respiratory Diseases, First Faculty of Medicine</p> <p>Šestáková, Zuzana; General University Hospital in Prague, 1st Department of Tuberculosis and Respiratory Diseases, First Faculty of Medicine</p> <p>Heuvelmans, Marjolein; Amsterdam Universitair Medische Centra, Department of Respiratory Medicine</p> <p>Daniels, Johannes ; Amsterdam Universitair Medische Centra, Department of Respiratory Medicine</p> <p>de Bruin, Daniel; Amsterdam Universitair Medische Centra, Department</p> |

1  
2  
3  
4  
5  
6  
7  
8  
9  
10  
11  
12  
13  
14  
15  
16  
17  
18  
19  
20  
21  
22  
23  
24  
25  
26  
27  
28  
29  
30  
31  
32  
33  
34  
35  
36  
37  
38  
39  
40  
41  
42  
43  
44  
45  
46  
47  
48  
49  
50  
51  
52  
53  
54  
55  
56  
57  
58  
59  
60

|                                    |                                                                                                                                                                                                                                                                                 |
|------------------------------------|---------------------------------------------------------------------------------------------------------------------------------------------------------------------------------------------------------------------------------------------------------------------------------|
|                                    | of Biomedical Engineering and Physics; Cancer Centre Amsterdam, Imaging and Biomarkers<br>Bonta, Peter; Amsterdam Universitair Medische Centra, Department of Respiratory Medicine<br>Annema, Jouke; Amsterdam Universitair Medische Centra, Department of Respiratory Medicine |
| <b>Primary Subject Heading</b> :   | Respiratory medicine                                                                                                                                                                                                                                                            |
| <b>Secondary Subject Heading</b> : | Oncology, Pathology, Diagnostics                                                                                                                                                                                                                                                |
| <b>Keywords</b> :                  | Biopsy, Clinical Trial, Diagnostic Imaging, Respiratory tract tumours < ONCOLOGY, Cytopathology < PATHOLOGY                                                                                                                                                                     |
|                                    |                                                                                                                                                                                                                                                                                 |

SCHOLARONE™  
Manuscripts

# Bronchoscopy with and without needle-based confocal laser endomicroscopy for peripheral lung nodule diagnosis: protocol for a multicenter randomized controlled trial (CLEVER trial)

S. van Heumen<sup>1</sup>, T. Kramer<sup>1</sup>, D.A. Korevaar<sup>1</sup>, D. Gompelmann<sup>2</sup>, C. Bal<sup>2</sup>, J. Hetzel<sup>3</sup>, M. Haentschel<sup>3</sup>, V. Poletti<sup>4</sup>, C. Ravaglia<sup>4</sup>, A. Sadoughi<sup>5</sup>, G. Stratakos<sup>6</sup>, E. Koukaki<sup>6</sup>, N. Anagnostopoulos<sup>6</sup>, J. Votruba<sup>7</sup>, Z. Šestáková<sup>7</sup>, M.A. Heuvelmans<sup>1</sup>, J.M.A. Daniels<sup>1</sup>, D.M. de Bruin<sup>8,9</sup>, P.I. Bonta<sup>1</sup>, J.T. Annema<sup>1\*</sup>

\*Corresponding author: Prof. dr. J.T. Annema, [j.t.annema@amsterdamumc.nl](mailto:j.t.annema@amsterdamumc.nl)

<sup>1</sup> Department of Respiratory Medicine, Amsterdam University Medical Centers, Amsterdam, The Netherlands

<sup>2</sup> Department of Internal Medicine II, Division of Pulmonology, Medical University of Vienna, Vienna, Austria

<sup>3</sup> Department of Internal Medicine, Division of Pneumology, Kantonspital Winterthur, Winterthur, Switzerland

<sup>4</sup> Department of Thoracic Diseases, G.B. Morgagni Hospital and University of Bologna, Forlì, Italy

<sup>5</sup> Department of Pulmonary Medicine, Montefiore Medical Center/Albert Einstein College of Medicine, Bronx, NY, USA.

<sup>6</sup> 1st Respiratory Medicine Department of the National, Kapodistrian University of Athens, Athens, Greece

<sup>7</sup> 1st Department of Tuberculosis and Respiratory Diseases, First Faculty of Medicine, Charles University and General University Hospital in Prague, Prague, Czech Republic

<sup>8</sup> Department of Biomedical Engineering and Physics, Amsterdam University Medical Centers, Amsterdam

<sup>9</sup> Cancer Center Amsterdam, Imaging and Biomarkers, Amsterdam, The Netherlands

## Abstract

**Introduction:** Despite many technological advances, the diagnostic yield of bronchoscopic peripheral lung nodule analysis remains limited due to frequent mispositioning. Needle-based confocal laser endomicroscopy (nCLE) enables real-time microscopic feedback on needle positioning, potentially improving the sampling location and diagnostic yield. Previous studies have defined and validated nCLE criteria for malignancy, airway, and lung parenchyma. Larger studies demonstrating the effect of nCLE on diagnostic yield are lacking. We aim to investigate if nCLE-imaging integrated with

1  
2  
3 conventional bronchoscopy results in a higher diagnostic yield compared to conventional  
4 bronchoscopy without nCLE.

5  
6 **Methods and analysis:** This is a parallel-group randomized controlled trial. Recruitment is performed  
7  
8 at pulmonology outpatient clinics in university and general hospitals in six different European  
9  
10 countries and one hospital in the United States. Consecutive patients with a for malignancy suspected  
11  
12 peripheral lung nodule (10-30 mm) with an indication for diagnostic bronchoscopy will be screened,  
13  
14 and 208 patients will be included. Web-based randomization (1:1) between the two procedures will  
15  
16 be performed. The primary outcome is diagnostic yield. Secondary outcomes include diagnostic  
17  
18 sensitivity for malignancy, needle repositionings, procedure and fluoroscopy duration, and  
19  
20 complications. Pathologists will be blinded to procedure type; patients and endoscopists will not.

21  
22 **Discussion:** Results of the CLEVER trial will inform on the added value of nCLE for the bronchoscopic  
23  
24 diagnosis of peripheral lung nodules.

25  
26 **Ethics and dissemination:** Primary approval by the Ethics Committee of the Amsterdam University  
27  
28 Medical Center. Dissemination involves publication in a peer-reviewed journal.

29  
30 **Support:** Financial and material support from Mauna Kea Technologies.

31  
32 **Trial registration:** ClinicalTrials.gov NCT06079970.

33  
34 **Keywords:** Respiratory tract neoplasms, bronchoscopy, confocal laser scanning microscopy, nCLE,  
35  
36 rapid-on-site evaluation (ROSE), histology/cytology, lung cancer, peripheral lung nodule

37  
38 **Manuscript word count:** 4053

## 39 40 Article summary

### 41 42 Strengths and limitations

- 43  
44 • This is the first (international multicenter) randomized controlled trial on needle-based confocal  
45  
46 laser endomicroscopy (nCLE) for bronchoscopic diagnosis of peripheral lung nodules.
- 47  
48 • This study provides the opportunity to evaluate the added benefit of the nCLE technique to  
49  
50 conventional diagnostic bronchoscopy including radial EBUS in multiple centers and countries.
- 51  
52 • The definition of diagnostic yield is under debate. In this study, the diagnostic yield will be  
53  
54 reported based on two different definitions for better comparison with existing and future  
55  
56 studies.
- 57  
58 • Each participating center uses their own methods for conventional bronchoscopic diagnosis of  
59  
60 peripheral lung nodules and will therefore not be completely uniform across all centers. Each

1  
2  
3 center will keep conventional methods uniform in both the control and intervention group to  
4 ensure differences can be attributed to the nCLE technique.  
5

- 6 • In this study only peripheral pulmonary nodules between 1 – 3 cm are included.  
7  
8  
9  
10  
11  
12  
13  
14  
15  
16  
17  
18  
19  
20  
21  
22  
23  
24  
25  
26  
27  
28  
29  
30  
31  
32  
33  
34  
35  
36  
37  
38  
39  
40  
41  
42  
43  
44  
45  
46  
47  
48  
49  
50  
51  
52  
53  
54  
55  
56  
57  
58  
59  
60

For peer review only

## Introduction

Lung cancer remains the leading cause of cancer-related deaths, with 2.09 million new diagnoses and 1.76 million deaths worldwide per year.(1, 2) The increased use of chest computed tomography (CT) and the future implementation of low-dose CT lung cancer screening result in an increased detection of lung nodules.(3, 4) Consequently, more early-stage lung cancer is detected, which is most often located in the periphery of the lung.(5, 6) Depending on lesion characteristics and associated risk factors, tissue sampling is needed to establish a definitive diagnosis and determine the appropriate treatment.

Bronchoscopic analysis of peripheral lung nodules remains challenging despite many technological innovations. The procedure comprises three essential pillars needed for a diagnostic success: navigation to the lesion, confirmation of tool location within the lesion (i.e., tool-in-lesion confirmation) and successful tissue sampling. In the past years, fluoroscopy, radial probe endobronchial ultrasound (r-EBUS), electromagnetic navigation (EMN), virtual bronchoscopy (VB) or cone beam computed tomography (CBCT) combined with augmented fluoroscopy have improved navigation with or without tool-in-lesion confirmation.(7) Additionally, rapid on-site evaluation (ROSE) is sometimes used for direct feedback on representativeness of the sample and forming a preliminary diagnosis. Nevertheless, diagnostic yield rarely exceeds 71%,(8) as it depends highly on factors such as nodule size, bronchus sign on pre-procedural CT, eccentric vs. concentric r-EBUS pattern, pre-test probability of malignancy and sampling tools used.(9-12) The arrival of robotic bronchoscopy platforms combined with existing techniques have shown promising results with high navigation success rates. However, diagnostic yield remains behind due to substantial mispositioning rates, retaining a large gap between navigation success and diagnostic yield.(13-15) The persistently low diagnostic yield calls for complementary techniques providing real-time information for fine-tuning the needle position.

Confocal laser endomicroscopy (CLE) is a high-resolution microscopic technique that visualizes individual cells in real-time. It has proven useful in the gastroenterology field, where it has been demonstrated that CLE could be used for rapid diagnosis, targeting of biopsies, and prediction of neoplasms.(16) CLE has been recently introduced in the respiratory tract, including for the peripheral lung nodule analysis.(17-19) CLE probes are thin enough to fit through 18G biopsy needles to provide microscopic feedback at the tip of the needle (needle-based CLE (nCLE)). Fluorescein dye is used as a contrast agent and binds to the extracellular matrix, resulting in a highly fluorescent background in which individual cells can be seen. Previous studies have identified three nCLE image characteristics

1  
2  
3 for malignancy in the lung,(19) and criteria for airway and lung parenchyma.(18) The identification of  
4 malignancy and distinction from airway and lung parenchyma were accurate based on these  
5 criteria.(18, 19)  
6  
7

8 A recent study demonstrated a high needle mispositioning rate, as nCLE-imaging resulted in a  
9 repositioning of the biopsy needle in 9 out of 20 patients.(20) nCLE could therefore potentially bridge  
10 the gap between navigation success and diagnostic yield.  
11  
12  
13

14  
15 To date, larger studies investigating the effect of the addition of nCLE to bronchoscopic peripheral  
16 lung nodule analysis are lacking. The improved diagnostic yield could reduce the necessity further or  
17 more invasive diagnostic interventions such as CT-guided transthoracic biopsies or diagnostic surgery.  
18 In this multicenter randomized controlled trial, we aim to investigate if nCLE-imaging integrated with  
19 conventional bronchoscopy results in a higher diagnostic yield compared to conventional  
20 bronchoscopy without nCLE in diagnosing peripheral lung nodules.  
21  
22  
23  
24  
25

## 26 **Methods and analysis**

### 27 **Study design**

28  
29 This study is an investigator-initiated, international, multicenter, parallel-group randomized  
30 controlled trial comparing two bronchoscopy procedures (with or without nCLE) for the diagnosis of  
31 suspected peripheral lung nodules. The study flowchart is shown in Figure 1.  
32  
33  
34  
35  
36  
37  
38

### 39 **Participating centers**

40  
41 The study is executed in university or general hospitals in six countries in Europe and one hospital in  
42 the United States. Study inclusion started on 18 October 2023. Other centers will start including in  
43 2024 and the estimated duration of the study is 24 months including follow up.  
44  
45  
46  
47

### 48 **Randomization**

49  
50 After the participant has given written informed consent, patient data is entered into a digital  
51 database (CASTOR Electronic Data Capture (EDC) electronic case report form (eCRF)). We will use a  
52 web-based block-randomization module in Castor to randomize participants into the control and  
53 interventional group (1:1). Randomization will be stratified by participating center to ensure that the  
54 nCLE and non-nCLE group is of the same size in each center. As nodule size has significant impact on  
55  
56  
57  
58  
59  
60

1  
2  
3 diagnostic yield,(8) we will stratify for nodule size ( $\leq 20$  mm and  $>20$  mm) to ensure that size is evenly  
4 distributed across study arms.  
5  
6  
7

8 Patients and endoscopists will not be blinded since the physician needs to know if nCLE images must  
9 be acquired during bronchoscopy. Pathologists will be blinded to procedure type and raters who will  
10 analyze the nCLE videos after the procedure will be blinded to the patient history and  
11 histopathological outcome of the tissue samples.  
12  
13  
14

## 15 16 17 **Study population**

18  
19 Consecutive patients will be recruited by their treating physician at pulmonology outpatient clinics of  
20 participating centers. Patients are eligible for inclusion if they meet the following inclusion criteria:  
21  
22

- 23 1.  $\geq 18$  years of age
  - 24 2. Suspected malignant peripheral lung lesion with an indication for a bronchoscopic diagnostic  
25 work-up as determined by the attending physician or tumor board. Peripheral pulmonary  
26 lesions are defined as lesions located beyond the visible segmental bronchi, not detectable by  
27 regular flexible bronchoscopy
  - 28 3. Bronchus sign on pre-procedural CT or estimated confidence for successful navigation to the  
29 nodule resulting in a r-EBUS signal
  - 30 4. Solid part of the lesion must be  $\geq 10$  mm
  - 31 5. Largest dimension of lesion size on CT  $\leq 30$  mm (long-axis)
  - 32 6. Ability to understand and willingness to sign a written informed consent
- 33  
34  
35  
36  
37  
38  
39  
40

41 A potential subject who meets any of the following criteria will be excluded from participation in this  
42 study:  
43

- 44 1. Inability or non-willingness to provide informed consent
- 45 2. Endobronchial visible malignancy on bronchoscopic inspection
- 46 3. Target lesion within reach of the linear EBUS scope
- 47 4. Failure to comply with the study protocol
- 48 5. Known allergy or risk factors for an allergic reaction to fluorescein
- 49 6. Pregnancy or breastfeeding
- 50 7. Hemodynamic instability
- 51 8. Refractory hypoxemia
- 52 9. Therapeutic anticoagulant use that cannot be withheld for an appropriate interval before the  
53 procedure  
54  
55  
56  
57  
58  
59  
60



10. Unable to tolerate general anesthesia according to the anesthesiologist
11. Undergoing chemotherapy as several chemotherapies have fluorescent properties at the same wavelength (e.g., doxorubicin)

### Primary outcome measure

Diagnostic yield (defined as the proportion of patients in whom the bronchoscopic procedure results in a definitive diagnosis [either malignant, specific benign or non-specific benign confirmed as benign in follow-up], relative to the total number of patients that underwent the diagnostic bronchoscopic procedure). If patients with multiple lesions are included, the diagnostic yield will be computed per nodule.

### Secondary outcome measures

1. Diagnostic sensitivity for malignancy (defined as the proportion of patients in whom the bronchoscopic procedure diagnoses malignancy relative to the total number of patients with a final diagnosis of malignancy as determined by the reference standard).
2. Diagnostic yield according to the strict definition by Vachani et al.(21) (defined as the proportion of patients in whom the bronchoscopic procedure results in a definitive diagnosis [either malignant or specific benign diagnosis], relative to the total number of patients that underwent the diagnostic bronchoscopic procedure).
3. Procedure duration (from bronchoscope insertion until removal).
4. Percentage of patients in which the needle was fine-tuned (defined as moving the needle within the same distal airway) or repositioned (defined as the selection of a different distal airway for tissue sampling) based on nCLE feedback (defined as the number of patients the needle was fine-tuned/repositioned divided by the total number of patients in which nCLE imaging was used).
5. Fluoroscopy radiation time and dose.
6. Diagnostic yield of ROSE (defined as the proportion of patients in whom ROSE resulted in a classifying diagnosis [malignant or specific benign diagnosis], relative to the total number of patients).
7. Proportion of patients in which ROSE provided tool-in-lesion confirmation, meaning that the acquired tissue shows signs of a malignant or non-malignant diagnosis and was not related to airway/lung parenchyma sampling such as bronchus epithelium/blood contamination, and tissue not suitable for a specific diagnosis such as atypical cells.

- 1
  - 2
  - 3
  - 4
  - 5
  - 6
  - 7
  - 8
  - 9
  - 10
  - 11
  - 12
  - 13
  - 14
  - 15
  - 16
  - 17
  - 18
  - 19
  - 20
  - 21
  - 22
  - 23
  - 24
  - 25
  - 26
  - 27
  - 28
  - 29
  - 30
  - 31
  - 32
  - 33
  - 34
  - 35
  - 36
  - 37
  - 38
  - 39
  - 40
  - 41
  - 42
  - 43
  - 44
  - 45
  - 46
  - 47
  - 48
  - 49
  - 50
  - 51
  - 52
  - 53
  - 54
  - 55
  - 56
  - 57
  - 58
  - 59
  - 60
8. Complication rate (defined as any complication or complication categories occurring during or directly after the bronchoscopic procedure or any procedure-related complication within one week after the procedure).
  9. Requirement of additional diagnostic procedures (CT-guided transthoracic biopsies, surgical diagnostics and/or additional bronchoscopy) during the 6-month follow-up period.

### Exploratory endpoints

As an exploratory endpoint, we aim to identify potential new nCLE image characteristics for malignant and benign pathologies. We will also create an algorithm for automated nCLE criteria recognition using machine- or deep-learning methods.

### Outcome parameters

Table 1 shows the baseline patient characteristics and corresponding procedural information that will be collected at the time of study inclusion, during the procedure and 6-month follow-up period.

### Investigational product

The Cellvizio® confocal laser endomicroscopy system with the corresponding AQ-Flex™ 19 miniprobe (Mauna Kea technologies (MKT), Paris, France) is the investigational medical device of this study. The probe has a compatible operating diameter of 0.91 mm, a resolution of 3,5 µm, a penetration depth of 40 to 50 µm and a maximum field of view of 325 µm. The device and corresponding probes are CE-marked and will be used within the intended purpose.(22)

The technique uses a laser beam (488 nm) focused by an objective lens to illuminate the tissue, with the illumination focus at a pre-defined depth. The light strikes the tissue resulting in fluorescent light emission back from autofluorescent structures such as elastin in the airways or an exogenous fluorescent dye such as fluorescein, a contrast dye used for nCLE imaging in the lung. Light originating from the focal layer will be focused by the objective lens at the opening of a pinhole and detected, while light from out-of-focus layers is rejected by the pinhole. This results in high-resolution imaging of individual cells and structures at a specific point with limited influence of (scattered) light from out-of-focus areas.(22)

Table 1: Data to be collected

|                                                                                                                                                                                                                                    |
|------------------------------------------------------------------------------------------------------------------------------------------------------------------------------------------------------------------------------------|
| <b>Patient characteristics</b>                                                                                                                                                                                                     |
| Age                                                                                                                                                                                                                                |
| Sex                                                                                                                                                                                                                                |
| BMI                                                                                                                                                                                                                                |
| Smoking history                                                                                                                                                                                                                    |
| Patient cancer history                                                                                                                                                                                                             |
| Family history of lung cancer                                                                                                                                                                                                      |
| <b>Pre-procedural (PET)CT scan lesion characteristics</b>                                                                                                                                                                          |
| CT scan quality (slice thickness)                                                                                                                                                                                                  |
| Size (largest diameter)                                                                                                                                                                                                            |
| Localization (segmental level)                                                                                                                                                                                                     |
| Lesion appearance/nodule type (Solid, non-solid/ground glass, partially solid)                                                                                                                                                     |
| Bronchus sign (present(concentric/eccentric )/absent/insufficient CT scan quality)                                                                                                                                                 |
| Spiculation sign (present/absent)                                                                                                                                                                                                  |
| Emphysema (present/absent)                                                                                                                                                                                                         |
| PET uptake (not performed/no uptake/faint ( $SUV < 1$ )/moderate ( $SUV 1 - 2.5$ ) /intense ( $SUV > 2.5$ ))                                                                                                                       |
| <b>Intra-procedural information</b>                                                                                                                                                                                                |
| r-EBUS sign (eccentric, concentric, absent)                                                                                                                                                                                        |
| Location of tissue sampling (lung segment)                                                                                                                                                                                         |
| nCLE image observations (for every needle pass)                                                                                                                                                                                    |
| Needle fine-tuning & repositioning done (for every needle pass)                                                                                                                                                                    |
| Sampling techniques used (TBNA, (cryo)biopsy, brush)                                                                                                                                                                               |
| ROSE results of tissue sample (if available)                                                                                                                                                                                       |
| Bronchoscopy start and end time                                                                                                                                                                                                    |
| Fluoroscopy duration                                                                                                                                                                                                               |
| Additional procedures performed (e.g., EBUS/EUS-B/etc.)                                                                                                                                                                            |
| (Serious) complications                                                                                                                                                                                                            |
| <b>Post-procedural information</b>                                                                                                                                                                                                 |
| (Serious) complications (up to 1 week after the procedure)                                                                                                                                                                         |
| Final pathological diagnosis (cytology and/or histology)                                                                                                                                                                           |
| (Additional) Diagnostic follow-up procedures needed (e.g., transthoracic needle biopsies, surgery, additional bronchoscopy, follow-up imaging) including (altered) diagnosis and/or results of follow-up CT-scans of the lesion(s) |

*RUL: right upper lobe; RML: right middle lobe; RLL; right lower lobe; LUP: left upper lobe; LLL: left lower lobe; CT: computed tomography; ROSE: rapid on-site evaluation; r-EBUS: radial endobronchial ultrasound; TBNA: transbronchial needle aspiration; SUV: standard uptake value*

## Study procedures

### Conventional diagnostic bronchoscopy (control group & intervention group)

The following procedure will be performed routinely (regardless of study participation): Bronchoscopic procedures will be performed by experienced pulmonologists specifically trained in navigational bronchoscopy and nCLE-imaging. All procedures are performed according to institutional practice, usually on an outpatient basis. Patient preparation and sedation will be done according to institutional practice and might include propofol or midazolam sedation and the use of topical anesthesia. Vital parameters will be monitored during and after the procedure.

Systematic bronchoscopic inspection of the airways will be performed, followed by r-EBUS imaging (guide sheath optional) to select the distal airway with the highest probability of reaching the lesion. The use of fluoroscopy, EMN, VB or ultrathin bronchoscope is optional if regularly used at that institution. CBCT navigation with or without augmented fluoroscopy and robotic bronchoscopy will not be used in patients included in this trial. Bronchoscopist may use these techniques after following all actions related to this protocol while ensuring tissue samples are processed separately. Transbronchial needle aspirations (TBNA) using the 18G FleXNeedle® (Broncus Medical Inc., San Jose, United States of America) and (cryo)biopsies will be performed to acquire tissue for pathological evaluation (a recommended minimum of 3 TBNA and 3 biopsies). During the bronchoscopic work up, some of the cytological aspirations will be evaluated on site (Rapid onsite evaluation, ROSE) and the representativeness of the samples will be reported to the bronchoscopist. ROSE will always be performed for the first TBNA pass. For the following passes, the bronchoscopist decides if it is indicated.

### Addition of nCLE imaging (intervention group)

The same procedure will be performed as described above for the patients randomized to the intervention arm, except for the addition of fluorescein administration and nCLE imaging before TBNA. Prior to the procedure, an 18G needle is preloaded with the CLE probe (AQ-Flex™ 19 Miniprobe, Mauna Kea Technologies, Paris, France). The CLE probe is advanced through the needle until the probe is positioned approximately 4 mm past the needle tip and secured using a locking device to maintain the probe position relative to the needle tip.

1  
2  
3 After determining the sample location based on r-EBUS and/or fluoroscopy, fluorescein (2.5 mL of 10%  
4 fluoresceindinatrium solution) is administered intravenously. Then, the preloaded 18G needle  
5 punctures the target area, followed by the insertion of the CLE probe through the biopsy needle for  
6 real-time microscopic feedback. In case nCLE visualizes airway or lung parenchyma, indicating a near-  
7 miss, the biopsy needle is fine-tuned (i.e., the needle is moved within the same distal airway) or  
8 repositioned (i.e., a different distal airway is chosen). If nCLE demonstrates that the biopsy needle is  
9 placed within the lesion, the CLE probe is removed from the biopsy needle while holding the needle  
10 in position, followed by tissue sampling at the same location (repeated for at least 3 TBNA). A  
11 flowchart of the procedure steps for both the conventional bronchoscopy and the nCLE-guided  
12 bronchoscopy is shown in Figure 2.  
13  
14  
15  
16  
17  
18  
19

### 20 21 **nCLE image interpretation**

22  
23 The airway and lung parenchyma nCLE criteria as described by Kramer et al.(18) will be considered as  
24 “out-of-lesion” criteria indicating mispositioning of the needle. Currently known criteria for “tool-in-  
25 lesion” are malignancy criteria and granuloma criteria.(18, 19, 23) nCLE images will be interpreted  
26 during the procedure by the performing bronchoscopist and their team. Additionally, all videos are  
27 rated post-procedure by blinded raters of the initiating center to establish a ground truth  
28 interpretation of the images.  
29  
30  
31  
32  
33  
34

### 35 **Pathological examination**

36  
37 The cytological and histological examination will be done according to standard hospital procedure. In  
38 case the bronchoscopic procedure is considered non-diagnostic, additional procedures (transthoracic  
39 needle aspiration, surgical procedure, etc.) could follow to obtain a definite diagnosis. Results of the  
40 nCLE imaging do not influence the indication for additional diagnostic procedures. If a surgical  
41 procedure is indicated, the histological images will be collected to compare this with the nCLE imaging.  
42  
43  
44  
45  
46

47 In this study, the final pathological diagnosis will be subdivided into four categories as described by  
48 Vachani et al.,(21) namely [1] malignant, [2] non-malignant, which is divided into specific benign  
49 (including granulomatous, infectious and lymphocyte-predominant patterns) or nonspecific benign  
50 (e.g. inflammation), and [3] non-diagnostic (i.e., insufficient material for classifying diagnosis or in case  
51 atypical cells could not be classified further).  
52  
53  
54  
55  
56

### 57 **Reference standard**

1  
2  
3 For the primary outcome, diagnostic yield will be calculated using the intermediate method described  
4 by Vachani et al.(21) The abovementioned final pathological diagnosis categories will be used  
5 regardless of the results of the reference standard, except for initial non-specific benign diagnoses. In  
6 these cases, results from the reference standard will be considered. If the initial benign diagnosis is  
7 confirmed benign in follow-up, the bronchoscopic procedure will be considered diagnostic.  
8

9  
10 For the calculation of diagnostic sensitivity, malignant cases identified by the procedures under  
11 investigation will be considered as true positive since false positive results (almost) never occur.  
12 Benign (either specific or non-specific) and non-diagnostic samples will undergo a reference standard,  
13 which can be a subsequent sampling method such as transthoracic needle biopsy or surgery.  
14 Alternatively, if no subsequent sampling method is performed, clinical and radiological follow-up at 6  
15 months is considered the reference standard. If follow-up CT imaging shows regression or resolution  
16 of the nodule or in case a nodule remains stable, it will be considered as a confirmation of non-  
17 malignant diagnosis (i.e., true negative). Cases that are benign (either specific or non-specific) or non-  
18 diagnostic at the index bronchoscopy will be considered false negative if a malignancy diagnosis is  
19 established by the reference standard or if therapeutic procedures are done without confirmation of  
20 diagnosis. Figure 3 gives a schematic overview of the calculation methods of diagnostic yield and  
21 sensitivity for malignancy.  
22  
23  
24  
25  
26  
27  
28  
29  
30  
31  
32

### 33 **Informed consent procedure**

34  
35 Patients will be recruited by their treating physician. If the patient is willing to receive more  
36 information about study participation, information will be provided by the local investigator. The  
37 eligible participants will have sufficient time to consider their consent. Written informed consent must  
38 be provided before any study-related procedures take place. After informed consent, patients will be  
39 randomized using Castor EDC software and assigned to the control or intervention group. The  
40 bronchoscopy will then be performed according to the study protocol. In case patients decline  
41 participation in the study, they will be treated to the usual local clinical practices and guidelines.  
42  
43  
44  
45  
46  
47

### 48 **Quality assurance**

49  
50 Only experienced pulmonologists will perform the procedures to ensure high-quality bronchoscopic  
51 procedures. Additionally, all participating centers will be trained in the use of the CLE Cellvizio device  
52 and to maintain homogeneous quality of the nCLE image acquisition and interpretation over all  
53 centers. Training entails theoretic and practical training by the initiating center with extensive nCLE  
54 experience and MKT representatives.  
55  
56  
57  
58  
59  
60

## Sample size justification

Based on previous studies and meta-analyses, we expect the diagnostic yield in patients with a lesion <30 mm in the conventional bronchoscopy arm to be 62%.<sup>(24, 25)</sup> We hypothesize that additional nCLE guidance in the intervention arm will result in a diagnostic yield of 80%. In total, 198 patients are needed to show that nCLE guidance results in a diagnostic yield that is 18 percent point higher than the conventional bronchoscopy arm ( $\alpha=0.05$  and  $\text{power}=0.80$ ). Taking into account a 5% study drop-out, a total of 208 patients will be included. We believe an increase in the diagnostic yield (from 62% to 80%) demonstrates a clinically relevant improvement in lung cancer diagnosis.

## Data analysis

Results for continuous variables will be expressed as means and standard deviations or medians with interquartile ranges. Categorical variables will be expressed as frequencies and percentages. The Chi-squared test will be used to compare diagnostic yield (or other comparisons between categorical variables) between the two randomization groups. Continuous variables will be compared using Student's t-test, or Mann-Whitney-U tests. A two-tailed P-value <0.05 will be considered statistically significant. All analyses are done based on an intention-to-treat approach, meaning that patients are analyzed as part of the intervention group they were assigned to, even if nCLE imaging was not executed in a patient in the intervention arm due to unforeseen circumstances. These specific cases will be reported in the manuscript. Patients not undergoing the planned bronchoscopy procedure after randomization are excluded from the analysis. Patients with missing outcome data will be excluded from analysis. Patients with incomplete essential follow-up information will also be excluded from the calculation of diagnostic sensitivity. However, we will also calculate diagnostic sensitivity based on a 'worst-case scenario', in which these patients are considered false negatives. For the primary outcome, subgroup analysis will be performed for several lesions and procedural characteristics (lesion size ( $\leq 20$  mm vs  $> 20$  mm), radial EBUS image (eccentric vs concentric vs absent), location (upper lobe (without lingual) vs middle lobe/lingual vs lower lobe), pre-test probability that the nodule is cancerous (<10%, 10 – 35%, 36-70% and >70%) based on the Brock score.<sup>(26)</sup>

## Patient and Public Involvement statement

There was no patients or public involvement in the design of this study. An original research manuscript will be prepared to present the study results.

## Ethics and dissemination

The CLEVER study will be conducted in accordance with the Declaration of Helsinki (64th WMA General Assembly, Fortaleza, Brazil, October 2013) and the Medical Research Involving Human Subjects Act (WMO, The Netherlands) principles. To date, the Medical Ethical Committee of the Amsterdam UMC (NL83257.018.22), Athens Chest Hospital (21583/25-08-23) and General University Hospital in Prague (č.j. 143/23 S) have approved the study. All participating sites will obtain local ethical approval prior to starting inclusions. Written informed consent will be obtained prior to randomization and any study-related procedures. In case of major changes to the protocol, the ethical review board will be notified, and it will be communicated with all participating centers and registered on [clinicaltrials.gov](https://clinicaltrials.gov).

## Data management and safety

After informed consent, the patient will be given a code. This code will be used on all (pseudonymized) data, including CLE images and electronic Case Report Form (eCRF) data. Castor Electronic Data Capture ecosystem (International Organization of Standardization (ISO) 27001 and 9001 certified) will be used to collect key patient information described in outcome parameters. The key to the code is safeguarded by the local principal investigator and access to all records is limited to directly involved researchers. The coordinating investigator will centralize patients' data, and principal investigators will have direct access to their own site's data sets and to other sites' data upon reasonable request. All principal investigators will maintain records, including signed patient informed consent forms and information on adverse events.

Data management of all data (collection, storage, and analysis) will be done according to the local data management plan. All records will be stored for a period of 15 years following the completion or termination of the study. Monitoring will be done according to a monitoring plan with specific attention paid to informed consent, completion of the eCRF, and storage of CLE video data.

## Patient safety and adverse events

The study was deemed a negligible risk study (according to the Nederlandse Federatie van Universitaire Medisch Centra (NFU) descriptions) by the ethical committee of the Amsterdam UMC. Previous study publications showed that nCLE-imaging and intravenous fluorescein administration are safe.<sup>(27)</sup> Fluorescein adverse reactions are rare and mostly mild in nature. No study related adverse



1  
2  
3 events occurred in the prior bronchoscopic nCLE studies in the Amsterdam UMC.(18, 19) Estimated  
4 prolonged endoscopy time due to study participation is approximately 10 minutes. Patients will not  
5 be aware of this as they will already be sedated for the bronchoscopic procedure.  
6  
7  
8

9  
10 In case any (serious) adverse event ((S)AE) occur during the procedure or up to one week after the  
11 procedure, the sponsor will register SAEs through the web portal *Toetsingonline* to the accredited  
12 METC that has approved the protocol. Adverse events are defined as any undesirable experience  
13 occurring to a subject during the study, whether or not considered related to the trial procedure. The  
14 severity and possible relatedness to the investigational product or the procedure will be documented.  
15 Investigators of the participating centers will report all serious adverse events to the coordinating and  
16 principal investigator of the initiating site. Reporting of SAEs that result in death or are life-threatening  
17 will be done within 7 days after initial identification, followed by a period of a maximum of 8 days to  
18 complete the preliminary report. All other SAEs will be reported within 15 days after first knowledge  
19 of the SAE.  
20  
21  
22  
23  
24  
25  
26  
27  
28

### 29 **Annual progress report**

30  
31 The sponsor will ensure that a progress report is submitted to the medical ethics committee once a  
32 year. Information on the start date of inclusion, number of subjects included to date, number of  
33 subjects that have completed participation, serious adverse events, and amendments.  
34  
35  
36  
37

### 38 **Dissemination**

39  
40 We aim to publish the study results in a peer-reviewed journal. Reporting will be in line with CONSORT  
41 and STARD 2015 reporting guidelines.(28, 29)  
42  
43  
44

### 45 **Discussion**

46  
47 In this multicenter, investigator-initiated, randomized controlled trial, we aim to determine if the  
48 addition of nCLE-imaging to bronchoscopic peripheral lung lesion analysis results in an improved  
49 diagnostic yield.  
50  
51  
52  
53

54  
55 Since there still is a gap between the success rate of navigating the tissue sampling instrument toward  
56 the target lesion and the final diagnostic yield, there is a need for real-time tool-in-lesion confirmation.  
57 The addition of high-resolution microscopic nCLE imaging at the tip of the needle could potentially  
58 lead to a decrease in mispositioning rates and an improved diagnostic yield. As a result, fewer patients  
59  
60

1  
2  
3 would need additional diagnostic procedures such as transthoracic needle biopsy or surgery, which  
4 are more invasive and have higher incidences of complications such as pneumothorax and  
5 hemorrhage.(30) Previous smaller studies have already shown that nCLE is safe, and raters can  
6 distinguish different image characteristics with high accuracy. On top of that, it has also been  
7 demonstrated that fine-tuning the needle based on these image characteristics is often done, even  
8 when navigation to the lesion was successful.(18-20) However, nCLE image interpretation remains  
9 subjective and challenging, especially when interpreting images live in the bronchoscopy suite. As  
10 described by Tian et al.(31), the role of artificial intelligence might be important to make the technique  
11 routinely implementable in clinical practice. An exploratory endpoint of this study is to develop a  
12 deep-learning network for automated image interpretation. This is the first step towards easier,  
13 quicker and reproducible image interpretation.  
14  
15  
16  
17  
18  
19  
20  
21  
22

23 Current literature on nCLE imaging for this purpose remains limited to smaller patient groups and the  
24 clinical benefit remains to be demonstrated. The results of the CLEVER study provide a formal  
25 comparison between conventional image-guided diagnostic bronchoscopy and conventional  
26 bronchoscopy with the addition of nCLE in a large randomized patient group. The results of this trial  
27 will clarify the added benefit of nCLE for bronchoscopic diagnosis of peripheral lung nodules and  
28 identify which patients could benefit from the use of this technique.  
29  
30  
31  
32  
33  
34

## 35 Author contributions

36  
37 SvH, TK, DAK, DMdB, PIB and JTA were involved in conception and trial design. SvH, TK, DAK, PIB and  
38 JTA were involved in drafting of the study protocol. DAK provided statistical expertise. All authors were  
39 involved in editing and final approval of the protocol. SvH, DG, CB, JH, MH, VP, CR, AS, GS, EK, NA, JV,  
40 ZS, MAH, JMAD, PIB and JTA will be involved in the conduct of the study and data acquisition. SvH,  
41 DAK, DMdB, PIB and JTA will be involved in the data analysis and interpretation. SvH, DAK, PIB and JTA  
42 will be involved in drafting of the final manuscript for dissemination. All authors will provide editing  
43 and approval of the final manuscript for publication.  
44  
45  
46  
47  
48  
49

## 50 Funding

51  
52 This is an investigator-initiated study with financial and material support from Mauna Kea  
53 Technologies (9 Rue d'Enghien, 75010 Paris, France). The funder has no role in study design, data  
54 collection and analysis, decision to publish, or preparation of the manuscript.  
55  
56  
57  
58  
59  
60

## Declaration of interests

JTA declares material and financial support to the sponsor's institution from Mauna Kea Technologies for this study.

## Data sharing statement

The final trial dataset will be available to study investigators on completion of the trial, and after publication of the primary manuscript. All data relevant to the study will be included in the article or uploaded as supplementary information. Data are available upon reasonable request.

## Bibliography

1. Bade BC, Dela Cruz CS. Lung Cancer 2020: Epidemiology, Etiology, and Prevention. *Clin Chest Med.* 2020;41(1):1-24. doi:10.1016/j.ccm.2019.10.001.
2. Sung H, Ferlay J, Siegel RL, et al. Global Cancer Statistics 2020: GLOBOCAN Estimates of Incidence and Mortality Worldwide for 36 Cancers in 185 Countries. *CA: A Cancer Journal for Clinicians.* 2021;71(3):209-49. doi:10.3322/caac.21660.
3. Hoffman RM, Atallah RP, Struble RD, Badgett RG. Lung Cancer Screening with Low-Dose CT: a Meta-Analysis. *J Gen Intern Med.* 2020;35(10):3015-25. doi:10.1007/s11606-020-05951-7.
4. Hyldgaard C, Trolle C, Harders SMW, et al. Increased use of diagnostic CT imaging increases the detection of stage IA lung cancer: pathways and patient characteristics. *BMC Cancer.* 2022;22(1):464. doi:10.1186/s12885-022-09585-2.
5. Zhang EW, Shepard JO, Kuo A, et al. Characteristics and Outcomes of Lung Cancers Detected on Low-Dose Lung Cancer Screening CT. *Cancer Epidemiol Biomarkers Prev.* 2021;30(8):1472-9. doi:10.1158/1055-9965.Epi-20-1847.
6. Horeweg N, van der Aalst CM, Thunnissen E, et al. Characteristics of lung cancers detected by computer tomography screening in the randomized NELSON trial. *Am J Respir Crit Care Med.* 2013;187(8):848-54. doi:10.1164/rccm.201209-1651OC.
7. Kramer T, Annema JT. Advanced bronchoscopic techniques for the diagnosis and treatment of peripheral lung cancer. *Lung Cancer.* 2021;161:152-62. doi:10.1016/j.lungcan.2021.09.015.
8. Kops SEP, Heus P, Korevaar DA, et al. Diagnostic yield and safety of navigation bronchoscopy: A systematic review and meta-analysis. *Lung Cancer.* 2023;180:107196. doi:10.1016/j.lungcan.2023.107196.
9. Nadig TR, Thomas N, Nietert PJ, et al. Guided bronchoscopy for the evaluation of pulmonary lesions: An updated meta-analysis. *Chest.* 2023. doi:10.1016/j.chest.2022.12.044.
10. Chen A, Chenna P, Loiselle A, et al. Radial Probe Endobronchial Ultrasound for Peripheral Pulmonary Lesions. A 5-Year Institutional Experience. *Annals of the American Thoracic Society.* 2014;11(4):578-82. doi:10.1513/AnnalsATS.201311-384OC.
11. Mondoni M, Rinaldo RF, Carlucci P, et al. Bronchoscopic sampling techniques in the era of technological bronchoscopy. *Pulmonology.* 2022;28(6):461-71. doi:10.1016/j.pulmoe.2020.06.007.
12. Tang Y, Tian S, Chen H, et al. Transbronchial lung cryobiopsy for peripheral pulmonary lesions. A narrative review. *Pulmonology.* 2023. doi:10.1016/j.pulmoe.2023.08.010.
13. Chen AC, Pastis NJ, Jr., Mahajan AK, et al. Robotic Bronchoscopy for Peripheral Pulmonary Lesions: A Multicenter Pilot and Feasibility Study (BENEFIT). *Chest.* 2021;159(2):845-52. doi:10.1016/j.chest.2020.08.2047.

14. Chaddha U, Kovacs SP, Manley C, et al. Robot-assisted bronchoscopy for pulmonary lesion diagnosis: results from the initial multicenter experience. *BMC Pulmonary Medicine*. 2019;19(1):243. doi:10.1186/s12890-019-1010-8.
15. Gex G, Pralong JA, Combescure C, et al. Diagnostic yield and safety of electromagnetic navigation bronchoscopy for lung nodules: a systematic review and meta-analysis. *Respiration*. 2014;87(2):165-76. doi:10.1159/000355710.
16. Fugazza A, Gaiani F, Carra MC, et al. Confocal Laser Endomicroscopy in Gastrointestinal and Pancreatobiliary Diseases: A Systematic Review and Meta-Analysis. *Biomed Res Int*. 2016;2016:4638683. doi:10.1155/2016/4638683.
17. Goorsenberg A, Kalverda KA, Annema J, Bonta P. Advances in Optical Coherence Tomography and Confocal Laser Endomicroscopy in Pulmonary Diseases. *Respiration*. 2020;99(3):190-205. doi:10.1159/000503261.
18. Kramer T, Wijmans L, de Bruin M, et al. Bronchoscopic needle-based confocal laser endomicroscopy (nCLE) as a real-time detection tool for peripheral lung cancer. *Thorax*. 2022;77(4):370-7. doi:10.1136/thoraxjnl-2021-216885.
19. Wijmans L, Yared J, de Bruin DM, et al. Needle-based confocal laser endomicroscopy for real-time diagnosing and staging of lung cancer. *Eur Respir J*. 2019;53(6). doi:10.1183/13993003.01520-2018.
20. Manley CJ, Kramer T, Kumar R, et al. Robotic bronchoscopic needle-based confocal laser endomicroscopy to diagnose peripheral lung nodules. *Respirology*. 2022. doi:10.1111/resp.14438.
21. Vachani A, Maldonado F, Laxmanan B, et al. The Impact of Alternative Approaches to Diagnostic Yield Calculation in Studies of Bronchoscopy. *Chest*. 2022;161(5):1426-8. doi:10.1016/j.chest.2021.08.074.
22. Chauhan SS, Abu Dayyeh BK, Bhat YM, et al. Confocal laser endomicroscopy. *Gastrointestinal Endoscopy*. 2014;80(6):928-38. doi:10.1016/j.gie.2014.06.021.
23. Kramer T, Wijmans L, van Heumen S, et al. Needle-based confocal laser endomicroscopy for real-time granuloma detection. *Respirology*. 2023;28(10):934-41. doi:10.1111/resp.14542.
24. Ali MS, Trick W, Mba BI, et al. Radial endobronchial ultrasound for the diagnosis of peripheral pulmonary lesions: A systematic review and meta-analysis. *Respirology*. 2017;22(3):443-53. doi:10.1111/resp.12980.
25. Lee J, Song JU. Diagnostic yield of radial probe endobronchial ultrasonography-guided transbronchial biopsy without fluoroscopy in peripheral pulmonary lesions: A systematic review and meta-analysis. *Thorac Cancer*. 2023;14(2):195-205. doi:10.1111/1759-7714.14733.
26. McWilliams A, Tammemagi MC, Mayo JR, et al. Probability of cancer in pulmonary nodules detected on first screening CT. *N Engl J Med*. 2013;369(10):910-9. doi:10.1056/NEJMoa1214726.
27. Wallace MB, Meining A, Canto MI, et al. The safety of intravenous fluorescein for confocal laser endomicroscopy in the gastrointestinal tract. *Aliment Pharmacol Ther*. 2010;31(5):548-52. doi:10.1111/j.1365-2036.2009.04207.x.
28. Bossuyt PM, Reitsma JB, Bruns DE, et al. STARD 2015: an updated list of essential items for reporting diagnostic accuracy studies. *Bmj*. 2015;351:h5527. doi:10.1136/bmj.h5527.
29. Schulz KF, Altman DG, Moher D. CONSORT 2010 statement: updated guidelines for reporting parallel group randomised trials. *Bmj*. 2010;340:c332. doi:10.1136/bmj.c332.
30. Ho ATN, Gorthi R, Lee R, et al. Solitary Lung Nodule: CT-Guided Transthoracic Biopsy vs Transbronchial Biopsy With Endobronchial Ultrasound and Flexible Bronchoscope, a Meta-Analysis of Randomized Controlled Trials. *Lung*. 2023. doi:10.1007/s00408-023-00596-9.
31. Tian S, Huang H, Zhang Y, et al. The role of confocal laser endomicroscopy in pulmonary medicine. *Eur Respir Rev*. 2023;32(167). doi:10.1183/16000617.0185-2022.

## Figure headings

Figure 1: Study flowchart. r-EBUS: radial endobronchial ultrasound; EMN: electromagnetic navigation; VB: virtual bronchoscopy; nCLE: needle-based confocal laser endomicroscopy; TBNA: transbronchial needle aspiration; PET: positron emission tomography; CT: computed tomography

Figure 2: Procedure flowchart for control and interventional group (without and with nCLE). Note: fluorescein administration is only done once before the first puncture. TBNA: transbronchial needle aspiration; ROSE: rapid on-site evaluation; EBUS: endobronchial ultrasound; EMN: electromagnetic navigation; VB: virtual bronchoscopy; nCLE: needle-based confocal laser endomicroscopy

Figure 3: Flowchart explaining calculation methods of diagnostic yield and sensitivity of malignancy. SPB: specific benign; NSB: non-specific benign; ND: non-diagnostic; TP: true positive; TN: true negative; FN: false negative; CT: computed tomography

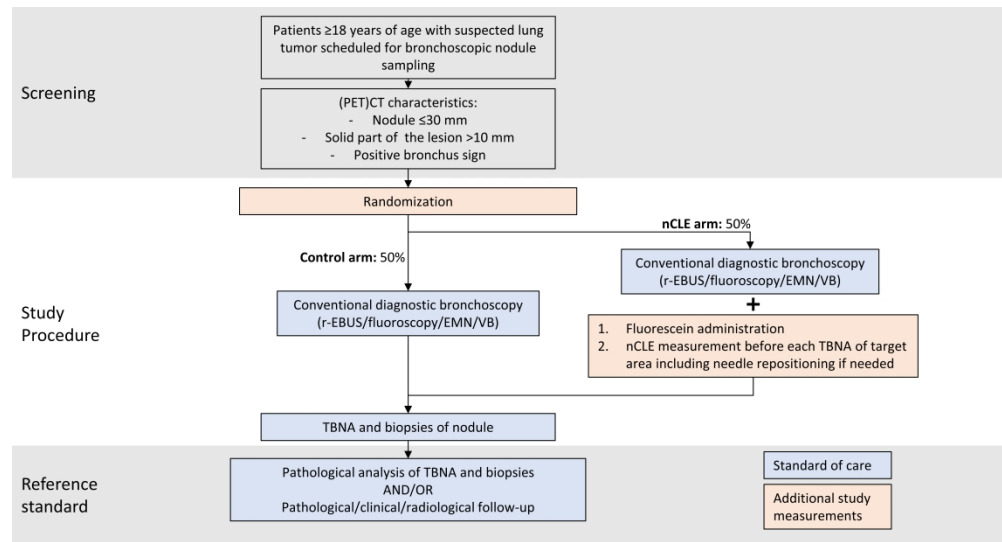

Figure 1: Study flowchart. r-EBUS: radial endobronchial ultrasound; EMN: electromagnetic navigation; VB: virtual bronchoscopy; nCLE: needle-based confocal laser endomicroscopy; TBNA: transbronchial needle aspiration; PET: positron emission tomography; CT: computed tomography

275x147mm (600 x 600 DPI)

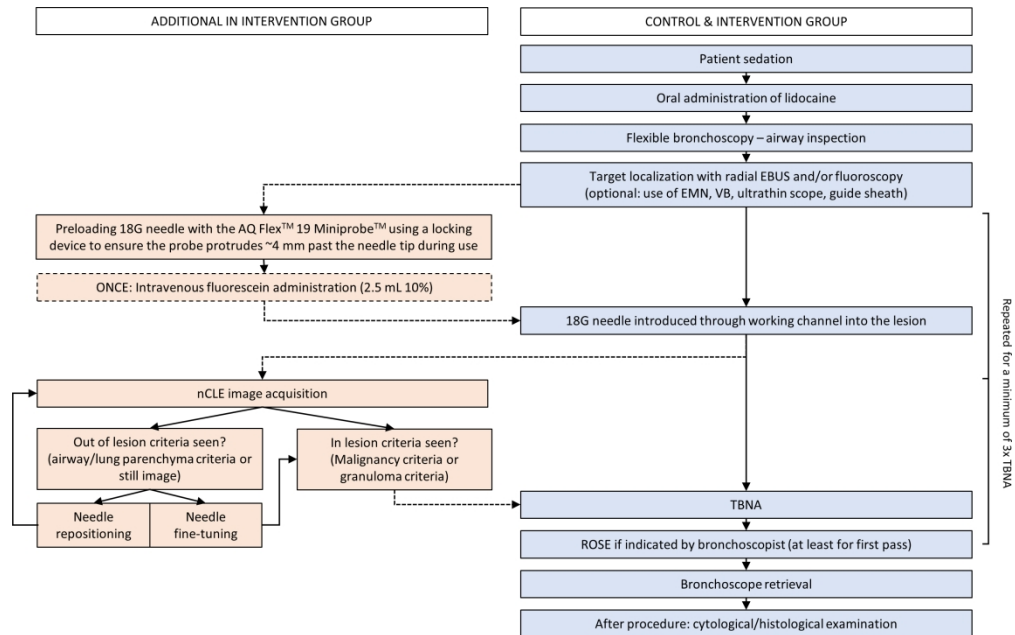

Figure 2: Procedure flowchart for control and interventional group (without and with nCLE). Note: fluorescein administration is only done once before the first puncture. TBNA: transbronchial needle aspiration; ROSE: rapid on-site evaluation; EBUS: endobronchial ultrasound; EMN: electromagnetic navigation; VB: virtual bronchoscopy; nCLE: needle-based confocal laser endomicroscopy

246x155mm (300 x 300 DPI)



28 Figure 3: Flowchart explaining calculation methods of diagnostic yield and sensitivity of malignancy. SPB: specific benign; NSB: non-specific benign; ND: non-diagnostic; TP: true positive; TN: true negative; FN: false negative; CT: computed tomography

262x170mm (300 x 300 DPI)



# Reporting checklist for protocol of a clinical trial.

Based on the SPIRIT guidelines.

## Instructions to authors

Complete this checklist by entering the page numbers from your manuscript where readers will find each of the items listed below.

Your article may not currently address all the items on the checklist. Please modify your text to include the missing information. If you are certain that an item does not apply, please write "n/a" and provide a short explanation.

Upload your completed checklist as an extra file when you submit to a journal.

In your methods section, say that you used the SPIRIT reporting guidelines, and cite them as:

Chan A-W, Tetzlaff JM, Gøtzsche PC, Altman DG, Mann H, Berlin J, Dickersin K, Hróbjartsson A, Schulz KF, Parulekar WR, Krleža-Jerić K, Laupacis A, Moher D. SPIRIT 2013 Explanation and Elaboration: Guidance for protocols of clinical trials. *BMJ*. 2013;346:e7586

|                                             | Reporting Item                                                                                                                  | Page Number |
|---------------------------------------------|---------------------------------------------------------------------------------------------------------------------------------|-------------|
| <b>Administrative information</b>           |                                                                                                                                 |             |
| Title                                       | <a href="#">#1</a> Descriptive title identifying the study design, population, interventions, and, if applicable, trial acronym | 1           |
| Trial registration                          | <a href="#">#2a</a> Trial identifier and registry name. If not yet registered, name of intended registry                        | 2           |
| Trial registration: data set                | <a href="#">#2b</a> All items from the World Health Organization Trial Registration Data Set                                    | NA          |
| Protocol version                            | <a href="#">#3</a> Date and version identifier                                                                                  | NA          |
| Funding                                     | <a href="#">#4</a> Sources and types of financial, material, and other support                                                  | 15          |
| Roles and responsibilities: contributorship | <a href="#">#5a</a> Names, affiliations, and roles of protocol contributors                                                     | 1 and 14    |

|    |                           |                     |                                                        |           |
|----|---------------------------|---------------------|--------------------------------------------------------|-----------|
| 1  | Roles and                 | <a href="#">#5b</a> | Name and contact information for the trial sponsor     | 1 and 14  |
| 2  | responsibilities:         |                     |                                                        |           |
| 3  | sponsor contact           |                     |                                                        |           |
| 4  | information               |                     |                                                        |           |
| 5  |                           |                     |                                                        |           |
| 6  |                           |                     |                                                        |           |
| 7  |                           |                     |                                                        |           |
| 8  | Roles and                 | <a href="#">#5c</a> | Role of study sponsor and funders, if any, in study    | 1, 14, 15 |
| 9  | responsibilities:         |                     | design; collection, management, analysis, and          |           |
| 10 | sponsor and funder        |                     | interpretation of data; writing of the report; and the |           |
| 11 |                           |                     | decision to submit the report for publication,         |           |
| 12 |                           |                     | including whether they will have ultimate authority    |           |
| 13 |                           |                     | over any of these activities                           |           |
| 14 |                           |                     |                                                        |           |
| 15 |                           |                     |                                                        |           |
| 16 |                           |                     |                                                        |           |
| 17 | Roles and                 | <a href="#">#5d</a> | Composition, roles, and responsibilities of the        | NA        |
| 18 | responsibilities:         |                     | coordinating centre, steering committee, endpoint      |           |
| 19 | committees                |                     | adjudication committee, data management team,          |           |
| 20 |                           |                     | and other individuals or groups overseeing the         |           |
| 21 |                           |                     | trial, if applicable (see Item 21a for data            |           |
| 22 |                           |                     | monitoring committee)                                  |           |
| 23 |                           |                     |                                                        |           |
| 24 |                           |                     |                                                        |           |
| 25 |                           |                     |                                                        |           |
| 26 |                           |                     |                                                        |           |
| 27 | <b>Introduction</b>       |                     |                                                        |           |
| 28 |                           |                     |                                                        |           |
| 29 | Background and            | <a href="#">#6a</a> | Description of research question and justification     | 3         |
| 30 | rationale                 |                     | for undertaking the trial, including summary of        |           |
| 31 |                           |                     | relevant studies (published and unpublished)           |           |
| 32 |                           |                     | examining benefits and harms for each                  |           |
| 33 |                           |                     | intervention                                           |           |
| 34 |                           |                     |                                                        |           |
| 35 |                           |                     |                                                        |           |
| 36 |                           |                     |                                                        |           |
| 37 |                           |                     |                                                        |           |
| 38 | Background and            | <a href="#">#6b</a> | Explanation for choice of comparators                  | 3         |
| 39 | rationale: choice of      |                     |                                                        |           |
| 40 | comparators               |                     |                                                        |           |
| 41 |                           |                     |                                                        |           |
| 42 |                           |                     |                                                        |           |
| 43 | Objectives                | <a href="#">#7</a>  | Specific objectives or hypotheses                      | 4         |
| 44 |                           |                     |                                                        |           |
| 45 | Trial design              | <a href="#">#8</a>  | Description of trial design including type of trial    | 4         |
| 46 |                           |                     | (eg, parallel group, crossover, factorial, single      |           |
| 47 |                           |                     | group), allocation ratio, and framework (eg,           |           |
| 48 |                           |                     | superiority, equivalence, non-inferiority,             |           |
| 49 |                           |                     | exploratory)                                           |           |
| 50 |                           |                     |                                                        |           |
| 51 |                           |                     |                                                        |           |
| 52 |                           |                     |                                                        |           |
| 53 |                           |                     |                                                        |           |
| 54 | <b>Methods:</b>           |                     |                                                        |           |
| 55 | <b>Participants,</b>      |                     |                                                        |           |
| 56 | <b>interventions, and</b> |                     |                                                        |           |
| 57 | <b>outcomes</b>           |                     |                                                        |           |
| 58 |                           |                     |                                                        |           |
| 59 |                           |                     |                                                        |           |
| 60 |                           |                     |                                                        |           |

|    |                                 |                      |                                                                                                                                                                                                                                                                                                                                                                                |         |
|----|---------------------------------|----------------------|--------------------------------------------------------------------------------------------------------------------------------------------------------------------------------------------------------------------------------------------------------------------------------------------------------------------------------------------------------------------------------|---------|
| 1  | Study setting                   | <a href="#">#9</a>   | Description of study settings (eg, community clinic, academic hospital) and list of countries where data will be collected. Reference to where list of study sites can be obtained                                                                                                                                                                                             | 4       |
| 2  |                                 |                      |                                                                                                                                                                                                                                                                                                                                                                                |         |
| 3  |                                 |                      |                                                                                                                                                                                                                                                                                                                                                                                |         |
| 4  |                                 |                      |                                                                                                                                                                                                                                                                                                                                                                                |         |
| 5  |                                 |                      |                                                                                                                                                                                                                                                                                                                                                                                |         |
| 6  |                                 |                      |                                                                                                                                                                                                                                                                                                                                                                                |         |
| 7  |                                 |                      |                                                                                                                                                                                                                                                                                                                                                                                |         |
| 8  | Eligibility criteria            | <a href="#">#10</a>  | Inclusion and exclusion criteria for participants. If applicable, eligibility criteria for study centres and individuals who will perform the interventions (eg, surgeons, psychotherapists)                                                                                                                                                                                   | 5,6     |
| 9  |                                 |                      |                                                                                                                                                                                                                                                                                                                                                                                |         |
| 10 |                                 |                      |                                                                                                                                                                                                                                                                                                                                                                                |         |
| 11 |                                 |                      |                                                                                                                                                                                                                                                                                                                                                                                |         |
| 12 |                                 |                      |                                                                                                                                                                                                                                                                                                                                                                                |         |
| 13 |                                 |                      |                                                                                                                                                                                                                                                                                                                                                                                |         |
| 14 |                                 |                      |                                                                                                                                                                                                                                                                                                                                                                                |         |
| 15 | Interventions: description      | <a href="#">#11a</a> | Interventions for each group with sufficient detail to allow replication, including how and when they will be administered                                                                                                                                                                                                                                                     | 9,10    |
| 16 |                                 |                      |                                                                                                                                                                                                                                                                                                                                                                                |         |
| 17 |                                 |                      |                                                                                                                                                                                                                                                                                                                                                                                |         |
| 18 |                                 |                      |                                                                                                                                                                                                                                                                                                                                                                                |         |
| 19 |                                 |                      |                                                                                                                                                                                                                                                                                                                                                                                |         |
| 20 | Interventions: modifications    | <a href="#">#11b</a> | Criteria for discontinuing or modifying allocated interventions for a given trial participant (eg, drug dose change in response to harms, participant request, or improving / worsening disease)                                                                                                                                                                               | NA      |
| 21 |                                 |                      |                                                                                                                                                                                                                                                                                                                                                                                |         |
| 22 |                                 |                      |                                                                                                                                                                                                                                                                                                                                                                                |         |
| 23 |                                 |                      |                                                                                                                                                                                                                                                                                                                                                                                |         |
| 24 |                                 |                      |                                                                                                                                                                                                                                                                                                                                                                                |         |
| 25 |                                 |                      |                                                                                                                                                                                                                                                                                                                                                                                |         |
| 26 |                                 |                      |                                                                                                                                                                                                                                                                                                                                                                                |         |
| 27 | Interventions: adherence        | <a href="#">#11c</a> | Strategies to improve adherence to intervention protocols, and any procedures for monitoring adherence (eg, drug tablet return; laboratory tests)                                                                                                                                                                                                                              | 11      |
| 28 |                                 |                      |                                                                                                                                                                                                                                                                                                                                                                                |         |
| 29 |                                 |                      |                                                                                                                                                                                                                                                                                                                                                                                |         |
| 30 |                                 |                      |                                                                                                                                                                                                                                                                                                                                                                                |         |
| 31 |                                 |                      |                                                                                                                                                                                                                                                                                                                                                                                |         |
| 32 | Interventions: concomitant care | <a href="#">#11d</a> | Relevant concomitant care and interventions that are permitted or prohibited during the trial                                                                                                                                                                                                                                                                                  | 9, 10   |
| 33 |                                 |                      |                                                                                                                                                                                                                                                                                                                                                                                |         |
| 34 |                                 |                      |                                                                                                                                                                                                                                                                                                                                                                                |         |
| 35 |                                 |                      |                                                                                                                                                                                                                                                                                                                                                                                |         |
| 36 | Outcomes                        | <a href="#">#12</a>  | Primary, secondary, and other outcomes, including the specific measurement variable (eg, systolic blood pressure), analysis metric (eg, change from baseline, final value, time to event), method of aggregation (eg, median, proportion), and time point for each outcome. Explanation of the clinical relevance of chosen efficacy and harm outcomes is strongly recommended | 6,7     |
| 37 |                                 |                      |                                                                                                                                                                                                                                                                                                                                                                                |         |
| 38 |                                 |                      |                                                                                                                                                                                                                                                                                                                                                                                |         |
| 39 |                                 |                      |                                                                                                                                                                                                                                                                                                                                                                                |         |
| 40 |                                 |                      |                                                                                                                                                                                                                                                                                                                                                                                |         |
| 41 |                                 |                      |                                                                                                                                                                                                                                                                                                                                                                                |         |
| 42 |                                 |                      |                                                                                                                                                                                                                                                                                                                                                                                |         |
| 43 |                                 |                      |                                                                                                                                                                                                                                                                                                                                                                                |         |
| 44 |                                 |                      |                                                                                                                                                                                                                                                                                                                                                                                |         |
| 45 |                                 |                      |                                                                                                                                                                                                                                                                                                                                                                                |         |
| 46 |                                 |                      |                                                                                                                                                                                                                                                                                                                                                                                |         |
| 47 |                                 |                      |                                                                                                                                                                                                                                                                                                                                                                                |         |
| 48 |                                 |                      |                                                                                                                                                                                                                                                                                                                                                                                |         |
| 49 | Participant timeline            | <a href="#">#13</a>  | Time schedule of enrolment, interventions (including any run-ins and washouts), assessments, and visits for participants. A schematic diagram is highly recommended (see Figure)                                                                                                                                                                                               | 9,10,11 |
| 50 |                                 |                      |                                                                                                                                                                                                                                                                                                                                                                                |         |
| 51 |                                 |                      |                                                                                                                                                                                                                                                                                                                                                                                |         |
| 52 |                                 |                      |                                                                                                                                                                                                                                                                                                                                                                                |         |
| 53 |                                 |                      |                                                                                                                                                                                                                                                                                                                                                                                |         |
| 54 |                                 |                      |                                                                                                                                                                                                                                                                                                                                                                                |         |
| 55 |                                 |                      |                                                                                                                                                                                                                                                                                                                                                                                |         |
| 56 |                                 |                      |                                                                                                                                                                                                                                                                                                                                                                                |         |
| 57 | Sample size                     | <a href="#">#14</a>  | Estimated number of participants needed to achieve study objectives and how it was                                                                                                                                                                                                                                                                                             | 11      |
| 58 |                                 |                      |                                                                                                                                                                                                                                                                                                                                                                                |         |
| 59 |                                 |                      |                                                                                                                                                                                                                                                                                                                                                                                |         |
| 60 |                                 |                      |                                                                                                                                                                                                                                                                                                                                                                                |         |

determined, including clinical and statistical assumptions supporting any sample size calculations

Recruitment [#15](#) Strategies for achieving adequate participant enrolment to reach target sample size 11

**Methods:**  
**Assignment of interventions (for controlled trials)**

Allocation: sequence generation [#16a](#) Method of generating the allocation sequence (eg, computer-generated random numbers), and list of any factors for stratification. To reduce predictability of a random sequence, details of any planned restriction (eg, blocking) should be provided in a separate document that is unavailable to those who enrol participants or assign interventions 4,5

Allocation concealment mechanism [#16b](#) Mechanism of implementing the allocation sequence (eg, central telephone; sequentially numbered, opaque, sealed envelopes), describing any steps to conceal the sequence until interventions are assigned 4,5

Allocation: implementation [#16c](#) Who will generate the allocation sequence, who will enrol participants, and who will assign participants to interventions 4,5

Blinding (masking) [#17a](#) Who will be blinded after assignment to interventions (eg, trial participants, care providers, outcome assessors, data analysts), and how 4,5

Blinding (masking): emergency unblinding [#17b](#) If blinded, circumstances under which unblinding is permissible, and procedure for revealing a participant's allocated intervention during the trial NA

**Methods: Data collection, management, and analysis**

|    |                                                  |                      |                                                                                                                                                                                                                                                                                                                                                                                                              |          |
|----|--------------------------------------------------|----------------------|--------------------------------------------------------------------------------------------------------------------------------------------------------------------------------------------------------------------------------------------------------------------------------------------------------------------------------------------------------------------------------------------------------------|----------|
| 1  | Data collection plan                             | <a href="#">#18a</a> | Plans for assessment and collection of outcome, baseline, and other trial data, including any related processes to promote data quality (eg, duplicate measurements, training of assessors) and a description of study instruments (eg, questionnaires, laboratory tests) along with their reliability and validity, if known. Reference to where data collection forms can be found, if not in the protocol | 7, 11    |
| 2  |                                                  |                      |                                                                                                                                                                                                                                                                                                                                                                                                              |          |
| 3  |                                                  |                      |                                                                                                                                                                                                                                                                                                                                                                                                              |          |
| 4  |                                                  |                      |                                                                                                                                                                                                                                                                                                                                                                                                              |          |
| 5  |                                                  |                      |                                                                                                                                                                                                                                                                                                                                                                                                              |          |
| 6  |                                                  |                      |                                                                                                                                                                                                                                                                                                                                                                                                              |          |
| 7  |                                                  |                      |                                                                                                                                                                                                                                                                                                                                                                                                              |          |
| 8  |                                                  |                      |                                                                                                                                                                                                                                                                                                                                                                                                              |          |
| 9  |                                                  |                      |                                                                                                                                                                                                                                                                                                                                                                                                              |          |
| 10 |                                                  |                      |                                                                                                                                                                                                                                                                                                                                                                                                              |          |
| 11 |                                                  |                      |                                                                                                                                                                                                                                                                                                                                                                                                              |          |
| 12 |                                                  |                      |                                                                                                                                                                                                                                                                                                                                                                                                              |          |
| 13 |                                                  |                      |                                                                                                                                                                                                                                                                                                                                                                                                              |          |
| 14 |                                                  |                      |                                                                                                                                                                                                                                                                                                                                                                                                              |          |
| 15 | Data collection plan: retention                  | <a href="#">#18b</a> | Plans to promote participant retention and complete follow-up, including list of any outcome data to be collected for participants who discontinue or deviate from intervention protocols                                                                                                                                                                                                                    | NA       |
| 16 |                                                  |                      |                                                                                                                                                                                                                                                                                                                                                                                                              |          |
| 17 |                                                  |                      |                                                                                                                                                                                                                                                                                                                                                                                                              |          |
| 18 |                                                  |                      |                                                                                                                                                                                                                                                                                                                                                                                                              |          |
| 19 |                                                  |                      |                                                                                                                                                                                                                                                                                                                                                                                                              |          |
| 20 |                                                  |                      |                                                                                                                                                                                                                                                                                                                                                                                                              |          |
| 21 |                                                  |                      |                                                                                                                                                                                                                                                                                                                                                                                                              |          |
| 22 | Data management                                  | <a href="#">#19</a>  | Plans for data entry, coding, security, and storage, including any related processes to promote data quality (eg, double data entry; range checks for data values). Reference to where details of data management procedures can be found, if not in the protocol                                                                                                                                            | 12,13    |
| 23 |                                                  |                      |                                                                                                                                                                                                                                                                                                                                                                                                              |          |
| 24 |                                                  |                      |                                                                                                                                                                                                                                                                                                                                                                                                              |          |
| 25 |                                                  |                      |                                                                                                                                                                                                                                                                                                                                                                                                              |          |
| 26 |                                                  |                      |                                                                                                                                                                                                                                                                                                                                                                                                              |          |
| 27 |                                                  |                      |                                                                                                                                                                                                                                                                                                                                                                                                              |          |
| 28 |                                                  |                      |                                                                                                                                                                                                                                                                                                                                                                                                              |          |
| 29 |                                                  |                      |                                                                                                                                                                                                                                                                                                                                                                                                              |          |
| 30 |                                                  |                      |                                                                                                                                                                                                                                                                                                                                                                                                              |          |
| 31 |                                                  |                      |                                                                                                                                                                                                                                                                                                                                                                                                              |          |
| 32 | Statistics: outcomes                             | <a href="#">#20a</a> | Statistical methods for analysing primary and secondary outcomes. Reference to where other details of the statistical analysis plan can be found, if not in the protocol                                                                                                                                                                                                                                     | 11,12    |
| 33 |                                                  |                      |                                                                                                                                                                                                                                                                                                                                                                                                              |          |
| 34 |                                                  |                      |                                                                                                                                                                                                                                                                                                                                                                                                              |          |
| 35 |                                                  |                      |                                                                                                                                                                                                                                                                                                                                                                                                              |          |
| 36 |                                                  |                      |                                                                                                                                                                                                                                                                                                                                                                                                              |          |
| 37 |                                                  |                      |                                                                                                                                                                                                                                                                                                                                                                                                              |          |
| 38 |                                                  |                      |                                                                                                                                                                                                                                                                                                                                                                                                              |          |
| 39 | Statistics: additional analyses                  | <a href="#">#20b</a> | Methods for any additional analyses (eg, subgroup and adjusted analyses)                                                                                                                                                                                                                                                                                                                                     | 10,11,12 |
| 40 |                                                  |                      |                                                                                                                                                                                                                                                                                                                                                                                                              |          |
| 41 |                                                  |                      |                                                                                                                                                                                                                                                                                                                                                                                                              |          |
| 42 |                                                  |                      |                                                                                                                                                                                                                                                                                                                                                                                                              |          |
| 43 | Statistics: analysis population and missing data | <a href="#">#20c</a> | Definition of analysis population relating to protocol non-adherence (eg, as randomised analysis), and any statistical methods to handle missing data (eg, multiple imputation)                                                                                                                                                                                                                              | 10,11,12 |
| 44 |                                                  |                      |                                                                                                                                                                                                                                                                                                                                                                                                              |          |
| 45 |                                                  |                      |                                                                                                                                                                                                                                                                                                                                                                                                              |          |
| 46 |                                                  |                      |                                                                                                                                                                                                                                                                                                                                                                                                              |          |
| 47 |                                                  |                      |                                                                                                                                                                                                                                                                                                                                                                                                              |          |
| 48 |                                                  |                      |                                                                                                                                                                                                                                                                                                                                                                                                              |          |
| 49 | <b>Methods:</b>                                  |                      |                                                                                                                                                                                                                                                                                                                                                                                                              |          |
| 50 | <b>Monitoring</b>                                |                      |                                                                                                                                                                                                                                                                                                                                                                                                              |          |
| 51 |                                                  |                      |                                                                                                                                                                                                                                                                                                                                                                                                              |          |
| 52 |                                                  |                      |                                                                                                                                                                                                                                                                                                                                                                                                              |          |
| 53 | Data monitoring: formal committee                | <a href="#">#21a</a> | Composition of data monitoring committee (DMC); summary of its role and reporting structure; statement of whether it is independent from the sponsor and competing interests; and reference to                                                                                                                                                                                                               | 13       |
| 54 |                                                  |                      |                                                                                                                                                                                                                                                                                                                                                                                                              |          |
| 55 |                                                  |                      |                                                                                                                                                                                                                                                                                                                                                                                                              |          |
| 56 |                                                  |                      |                                                                                                                                                                                                                                                                                                                                                                                                              |          |
| 57 |                                                  |                      |                                                                                                                                                                                                                                                                                                                                                                                                              |          |
| 58 |                                                  |                      |                                                                                                                                                                                                                                                                                                                                                                                                              |          |
| 59 |                                                  |                      |                                                                                                                                                                                                                                                                                                                                                                                                              |          |
| 60 |                                                  |                      |                                                                                                                                                                                                                                                                                                                                                                                                              |          |

where further details about its charter can be found, if not in the protocol. Alternatively, an explanation of why a DMC is not needed

|    |                                      |                                                                                                                                                                                                                                    |        |
|----|--------------------------------------|------------------------------------------------------------------------------------------------------------------------------------------------------------------------------------------------------------------------------------|--------|
| 1  |                                      |                                                                                                                                                                                                                                    |        |
| 2  |                                      |                                                                                                                                                                                                                                    |        |
| 3  |                                      |                                                                                                                                                                                                                                    |        |
| 4  |                                      |                                                                                                                                                                                                                                    |        |
| 5  | Data monitoring:                     | <a href="#">#21b</a>                                                                                                                                                                                                               | 13     |
| 6  | interim analysis                     | Description of any interim analyses and stopping guidelines, including who will have access to these interim results and make the final decision to terminate the trial                                                            |        |
| 7  |                                      |                                                                                                                                                                                                                                    |        |
| 8  |                                      |                                                                                                                                                                                                                                    |        |
| 9  |                                      |                                                                                                                                                                                                                                    |        |
| 10 |                                      |                                                                                                                                                                                                                                    |        |
| 11 |                                      |                                                                                                                                                                                                                                    |        |
| 12 | Harms                                | <a href="#">#22</a>                                                                                                                                                                                                                | 13     |
| 13 |                                      | Plans for collecting, assessing, reporting, and managing solicited and spontaneously reported adverse events and other unintended effects of trial interventions or trial conduct                                                  |        |
| 14 |                                      |                                                                                                                                                                                                                                    |        |
| 15 |                                      |                                                                                                                                                                                                                                    |        |
| 16 |                                      |                                                                                                                                                                                                                                    |        |
| 17 |                                      |                                                                                                                                                                                                                                    |        |
| 18 |                                      |                                                                                                                                                                                                                                    |        |
| 19 | Auditing                             | <a href="#">#23</a>                                                                                                                                                                                                                | NA     |
| 20 |                                      | Frequency and procedures for auditing trial conduct, if any, and whether the process will be independent from investigators and the sponsor                                                                                        |        |
| 21 |                                      |                                                                                                                                                                                                                                    |        |
| 22 |                                      |                                                                                                                                                                                                                                    |        |
| 23 |                                      |                                                                                                                                                                                                                                    |        |
| 24 | <b>Ethics and dissemination</b>      |                                                                                                                                                                                                                                    |        |
| 25 |                                      |                                                                                                                                                                                                                                    |        |
| 26 |                                      |                                                                                                                                                                                                                                    |        |
| 27 |                                      |                                                                                                                                                                                                                                    |        |
| 28 | Research ethics approval             | <a href="#">#24</a>                                                                                                                                                                                                                | 12     |
| 29 |                                      | Plans for seeking research ethics committee / institutional review board (REC / IRB) approval                                                                                                                                      |        |
| 30 |                                      |                                                                                                                                                                                                                                    |        |
| 31 |                                      |                                                                                                                                                                                                                                    |        |
| 32 | Protocol amendments                  | <a href="#">#25</a>                                                                                                                                                                                                                | 13     |
| 33 |                                      | Plans for communicating important protocol modifications (eg, changes to eligibility criteria, outcomes, analyses) to relevant parties (eg, investigators, REC / IRBs, trial participants, trial registries, journals, regulators) |        |
| 34 |                                      |                                                                                                                                                                                                                                    |        |
| 35 |                                      |                                                                                                                                                                                                                                    |        |
| 36 |                                      |                                                                                                                                                                                                                                    |        |
| 37 |                                      |                                                                                                                                                                                                                                    |        |
| 38 |                                      |                                                                                                                                                                                                                                    |        |
| 39 |                                      |                                                                                                                                                                                                                                    |        |
| 40 | Consent or assent                    | <a href="#">#26a</a>                                                                                                                                                                                                               | 11     |
| 41 |                                      | Who will obtain informed consent or assent from potential trial participants or authorised surrogates, and how (see Item 32)                                                                                                       |        |
| 42 |                                      |                                                                                                                                                                                                                                    |        |
| 43 |                                      |                                                                                                                                                                                                                                    |        |
| 44 |                                      |                                                                                                                                                                                                                                    |        |
| 45 |                                      |                                                                                                                                                                                                                                    |        |
| 46 | Consent or assent: ancillary studies | <a href="#">#26b</a>                                                                                                                                                                                                               | NA     |
| 47 |                                      | Additional consent provisions for collection and use of participant data and biological specimens in ancillary studies, if applicable                                                                                              |        |
| 48 |                                      |                                                                                                                                                                                                                                    |        |
| 49 |                                      |                                                                                                                                                                                                                                    |        |
| 50 |                                      |                                                                                                                                                                                                                                    |        |
| 51 | Confidentiality                      | <a href="#">#27</a>                                                                                                                                                                                                                | 12, 13 |
| 52 |                                      | How personal information about potential and enrolled participants will be collected, shared, and maintained in order to protect confidentiality before, during, and after the trial                                               |        |
| 53 |                                      |                                                                                                                                                                                                                                    |        |
| 54 |                                      |                                                                                                                                                                                                                                    |        |
| 55 |                                      |                                                                                                                                                                                                                                    |        |
| 56 |                                      |                                                                                                                                                                                                                                    |        |
| 57 |                                      |                                                                                                                                                                                                                                    |        |
| 58 |                                      |                                                                                                                                                                                                                                    |        |
| 59 |                                      |                                                                                                                                                                                                                                    |        |
| 60 |                                      |                                                                                                                                                                                                                                    |        |

|    |                       |                      |                                                        |               |
|----|-----------------------|----------------------|--------------------------------------------------------|---------------|
| 1  | Declaration of        | <a href="#">#28</a>  | Financial and other competing interests for            | 15            |
| 2  | interests             |                      | principal investigators for the overall trial and each |               |
| 3  |                       |                      | study site                                             |               |
| 4  |                       |                      |                                                        |               |
| 5  |                       |                      |                                                        |               |
| 6  | Data access           | <a href="#">#29</a>  | Statement of who will have access to the final trial   | 15            |
| 7  |                       |                      | dataset, and disclosure of contractual agreements      |               |
| 8  |                       |                      | that limit such access for investigators               |               |
| 9  |                       |                      |                                                        |               |
| 10 |                       |                      |                                                        |               |
| 11 | Ancillary and post    | <a href="#">#30</a>  | Provisions, if any, for ancillary and post-trial care, | NA            |
| 12 | trial care            |                      | and for compensation to those who suffer harm          |               |
| 13 |                       |                      | from trial participation                               |               |
| 14 |                       |                      |                                                        |               |
| 15 |                       |                      |                                                        |               |
| 16 |                       |                      |                                                        |               |
| 17 | Dissemination policy: | <a href="#">#31a</a> | Plans for investigators and sponsor to                 | 14            |
| 18 | trial results         |                      | communicate trial results to participants,             |               |
| 19 |                       |                      | healthcare professionals, the public, and other        |               |
| 20 |                       |                      | relevant groups (eg, via publication, reporting in     |               |
| 21 |                       |                      | results databases, or other data sharing               |               |
| 22 |                       |                      | arrangements), including any publication               |               |
| 23 |                       |                      | restrictions                                           |               |
| 24 |                       |                      |                                                        |               |
| 25 |                       |                      |                                                        |               |
| 26 |                       |                      |                                                        |               |
| 27 |                       |                      |                                                        |               |
| 28 | Dissemination policy: | <a href="#">#31b</a> | Authorship eligibility guidelines and any intended     | NA            |
| 29 | authorship            |                      | use of professional writers                            |               |
| 30 |                       |                      |                                                        |               |
| 31 |                       |                      |                                                        |               |
| 32 | Dissemination policy: | <a href="#">#31c</a> | Plans, if any, for granting public access to the full  | 15            |
| 33 | reproducible          |                      | protocol, participant-level dataset, and statistical   |               |
| 34 | research              |                      | code                                                   |               |
| 35 |                       |                      |                                                        |               |
| 36 |                       |                      |                                                        |               |
| 37 | <b>Appendices</b>     |                      |                                                        |               |
| 38 |                       |                      |                                                        |               |
| 39 |                       |                      |                                                        |               |
| 40 | Informed consent      | <a href="#">#32</a>  | Model consent form and other related                   | Supplementary |
| 41 | materials             |                      | documentation given to participants and                | information   |
| 42 |                       |                      | authorised surrogates                                  |               |
| 43 |                       |                      |                                                        |               |
| 44 |                       |                      |                                                        |               |
| 45 | Biological specimens  | <a href="#">#33</a>  | Plans for collection, laboratory evaluation, and       | NA            |
| 46 |                       |                      | storage of biological specimens for genetic or         |               |
| 47 |                       |                      | molecular analysis in the current trial and for        |               |
| 48 |                       |                      | future use in ancillary studies, if applicable         |               |
| 49 |                       |                      |                                                        |               |
| 50 |                       |                      |                                                        |               |
| 51 |                       |                      |                                                        |               |

The SPIRIT Explanation and Elaboration paper is distributed under the terms of the Creative Commons Attribution License CC-BY-NC. This checklist was completed on 19. October 2023 using <https://www.goodreports.org/>, a tool made by the [EQUATOR Network](#) in collaboration with [Penelope.ai](#)

# BMJ Open

## Bronchoscopy with and without needle-based confocal laser endomicroscopy for peripheral lung nodule diagnosis: protocol for a multicenter randomized controlled trial (CLEVER trial)

|                               |                                                                                                                                                                                                                                                                                                                                                                                                                                                                                                                                                                                                                                                                                                                                                                                                                                                                                                                                                                                                                                                                                                                                                                                                                                                                                                                                                                                                                                                                                                                                                                                                                                                                                                                                                                                                                                                                                                                                                                                                                                                                                                                                                                                                                       |
|-------------------------------|-----------------------------------------------------------------------------------------------------------------------------------------------------------------------------------------------------------------------------------------------------------------------------------------------------------------------------------------------------------------------------------------------------------------------------------------------------------------------------------------------------------------------------------------------------------------------------------------------------------------------------------------------------------------------------------------------------------------------------------------------------------------------------------------------------------------------------------------------------------------------------------------------------------------------------------------------------------------------------------------------------------------------------------------------------------------------------------------------------------------------------------------------------------------------------------------------------------------------------------------------------------------------------------------------------------------------------------------------------------------------------------------------------------------------------------------------------------------------------------------------------------------------------------------------------------------------------------------------------------------------------------------------------------------------------------------------------------------------------------------------------------------------------------------------------------------------------------------------------------------------------------------------------------------------------------------------------------------------------------------------------------------------------------------------------------------------------------------------------------------------------------------------------------------------------------------------------------------------|
| Journal:                      | <i>BMJ Open</i>                                                                                                                                                                                                                                                                                                                                                                                                                                                                                                                                                                                                                                                                                                                                                                                                                                                                                                                                                                                                                                                                                                                                                                                                                                                                                                                                                                                                                                                                                                                                                                                                                                                                                                                                                                                                                                                                                                                                                                                                                                                                                                                                                                                                       |
| Manuscript ID                 | bmjopen-2023-081148.R2                                                                                                                                                                                                                                                                                                                                                                                                                                                                                                                                                                                                                                                                                                                                                                                                                                                                                                                                                                                                                                                                                                                                                                                                                                                                                                                                                                                                                                                                                                                                                                                                                                                                                                                                                                                                                                                                                                                                                                                                                                                                                                                                                                                                |
| Article Type:                 | Protocol                                                                                                                                                                                                                                                                                                                                                                                                                                                                                                                                                                                                                                                                                                                                                                                                                                                                                                                                                                                                                                                                                                                                                                                                                                                                                                                                                                                                                                                                                                                                                                                                                                                                                                                                                                                                                                                                                                                                                                                                                                                                                                                                                                                                              |
| Date Submitted by the Author: | 26-Jan-2024                                                                                                                                                                                                                                                                                                                                                                                                                                                                                                                                                                                                                                                                                                                                                                                                                                                                                                                                                                                                                                                                                                                                                                                                                                                                                                                                                                                                                                                                                                                                                                                                                                                                                                                                                                                                                                                                                                                                                                                                                                                                                                                                                                                                           |
| Complete List of Authors:     | <p>van Heumen, Saskia; Amsterdam Universitair Medische Centra, Department of Respiratory Medicine</p> <p>Kramer, Tess; Amsterdam Universitair Medische Centra, Department of Respiratory Medicine</p> <p>Korevaar, Daniël; Amsterdam Universitair Medische Centra, Department of Respiratory Medicine</p> <p>Gompelmann, Daniela; Medical University of Vienna, Department of Internal Medicine II, Division of Pulmonology</p> <p>Bal, Christina; Medical University of Vienna, Department of Internal Medicine II, Division of Pulmonology</p> <p>Hetzel, Juergen; Kantonsspital Winterthur, Department of Internal Medicine, Division of Pneumology</p> <p>Haentschel, Maik; Kantonsspital Winterthur, Department of Internal Medicine, Division of Pneumology</p> <p>Poletti, V; Morgagni-Pierantoni Hospital, Department of Thoracic Diseases Ravaglia , Claudia; Morgagni-Pierantoni Hospital, Department of Thoracic Diseases, G.B. Morgagni Hospital and University of Bologna, Forli, Italy</p> <p>Sadoughi, Ali; Montefiore Medical Center Einstein Campus, Department of Pulmonary Medicine</p> <p>Stratakos, Grigoris; National and Kapodistrian University of Athens, 1st Respiratory Medicine Department of the National Kapodistrian University of Athens</p> <p>Koukaki, Evangelia; National and Kapodistrian University of Athens, 1st Respiratory Medicine Department of the National Kapodistrian University of Athens</p> <p>Anagnostopoulos, Nektarios; National and Kapodistrian University of Athens, 1st Respiratory Medicine Department of the National Kapodistrian University of Athens</p> <p>Votruba, Jiří; General University Hospital in Prague, 1st Department of Tuberculosis and Respiratory Diseases, First Faculty of Medicine</p> <p>Šestáková, Zuzana; General University Hospital in Prague, 1st Department of Tuberculosis and Respiratory Diseases, First Faculty of Medicine</p> <p>Heuvelmans, Marjolein; Amsterdam Universitair Medische Centra, Department of Respiratory Medicine</p> <p>Daniels, Johannes ; Amsterdam Universitair Medische Centra, Department of Respiratory Medicine</p> <p>de Bruin, Daniel; Amsterdam Universitair Medische Centra, Department</p> |



1  
2  
3  
4  
5  
6  
7  
8  
9  
10  
11  
12  
13  
14  
15  
16  
17  
18  
19  
20  
21  
22  
23  
24  
25  
26  
27  
28  
29  
30  
31  
32  
33  
34  
35  
36  
37  
38  
39  
40  
41  
42  
43  
44  
45  
46  
47  
48  
49  
50  
51  
52  
53  
54  
55  
56  
57  
58  
59  
60

|                                    |                                                                                                                                                                                                                                                                                 |
|------------------------------------|---------------------------------------------------------------------------------------------------------------------------------------------------------------------------------------------------------------------------------------------------------------------------------|
|                                    | of Biomedical Engineering and Physics; Cancer Centre Amsterdam, Imaging and Biomarkers<br>Bonta, Peter; Amsterdam Universitair Medische Centra, Department of Respiratory Medicine<br>Annema, Jouke; Amsterdam Universitair Medische Centra, Department of Respiratory Medicine |
| <b>Primary Subject Heading</b> :   | Respiratory medicine                                                                                                                                                                                                                                                            |
| <b>Secondary Subject Heading</b> : | Oncology, Pathology, Diagnostics                                                                                                                                                                                                                                                |
| <b>Keywords</b> :                  | Biopsy, Clinical Trial, Diagnostic Imaging, Respiratory tract tumours < ONCOLOGY, Cytopathology < PATHOLOGY                                                                                                                                                                     |
|                                    |                                                                                                                                                                                                                                                                                 |

SCHOLARONE™  
Manuscripts

# Bronchoscopy with and without needle-based confocal laser endomicroscopy for peripheral lung nodule diagnosis: protocol for a multicenter randomized controlled trial (CLEVER trial)

S. van Heumen<sup>1</sup>, T. Kramer<sup>1</sup>, D.A. Korevaar<sup>1</sup>, D. Gompelmann<sup>2</sup>, C. Bal<sup>2</sup>, J. Hetzel<sup>3</sup>, M. Haentschel<sup>3</sup>, V. Poletti<sup>4</sup>, C. Ravaglia<sup>4</sup>, A. Sadoughi<sup>5</sup>, G. Stratakos<sup>6</sup>, E. Koukaki<sup>6</sup>, N. Anagnostopoulos<sup>6</sup>, J. Votruba<sup>7</sup>, Z. Šestáková<sup>7</sup>, M.A. Heuvelmans<sup>1</sup>, J.M.A. Daniels<sup>1</sup>, D.M. de Bruin<sup>8,9</sup>, P.I. Bonta<sup>1</sup>, J.T. Annema<sup>1\*</sup>

\*Corresponding author: Prof. dr. J.T. Annema, [j.t.annema@amsterdamumc.nl](mailto:j.t.annema@amsterdamumc.nl)

<sup>1</sup> Department of Respiratory Medicine, Amsterdam University Medical Centers, Amsterdam, The Netherlands

<sup>2</sup> Department of Internal Medicine II, Division of Pulmonology, Medical University of Vienna, Vienna, Austria

<sup>3</sup> Department of Internal Medicine, Division of Pneumology, Kantonspital Winterthur, Winterthur, Switzerland

<sup>4</sup> Department of Thoracic Diseases, G.B. Morgagni Hospital and University of Bologna, Forlì, Italy

<sup>5</sup> Department of Pulmonary Medicine, Montefiore Medical Center/Albert Einstein College of Medicine, Bronx, NY, USA.

<sup>6</sup> 1st Respiratory Medicine Department of the National, Kapodistrian University of Athens, Athens, Greece

<sup>7</sup> 1st Department of Tuberculosis and Respiratory Diseases, First Faculty of Medicine, Charles University and General University Hospital in Prague, Prague, Czech Republic

<sup>8</sup> Department of Biomedical Engineering and Physics, Amsterdam University Medical Centers, Amsterdam

<sup>9</sup> Cancer Center Amsterdam, Imaging and Biomarkers, Amsterdam, The Netherlands

## Abstract

**Introduction:** Despite many technological advances, the diagnostic yield of bronchoscopic peripheral lung nodule analysis remains limited due to frequent mispositioning. Needle-based confocal laser endomicroscopy (nCLE) enables real-time microscopic feedback on needle positioning, potentially improving the sampling location and diagnostic yield. Previous studies have defined and validated nCLE criteria for malignancy, airway, and lung parenchyma. Larger studies demonstrating the effect of nCLE on diagnostic yield are lacking. We aim to investigate if nCLE-imaging integrated with

1  
2  
3 conventional bronchoscopy results in a higher diagnostic yield compared to conventional  
4 bronchoscopy without nCLE.  
5

6 **Methods and analysis:** This is a parallel-group randomized controlled trial. Recruitment is performed  
7 at pulmonology outpatient clinics in university and general hospitals in six different European  
8 countries and one hospital in the United States. Consecutive patients with a for malignancy suspected  
9 peripheral lung nodule (10-30 mm) with an indication for diagnostic bronchoscopy will be screened,  
10 and 208 patients will be included. Web-based randomization (1:1) between the two procedures will  
11 be performed. The primary outcome is diagnostic yield. Secondary outcomes include diagnostic  
12 sensitivity for malignancy, needle repositionings, procedure and fluoroscopy duration, and  
13 complications. Pathologists will be blinded to procedure type; patients and endoscopists will not.  
14

15 **Discussion:** Results of the CLEVER trial will inform on the added value of nCLE for the bronchoscopic  
16 diagnosis of peripheral lung nodules.  
17

18 **Ethics and dissemination:** Primary approval by the Ethics Committee of the Amsterdam University  
19 Medical Center. Dissemination involves publication in a peer-reviewed journal.  
20

21 **Support:** Financial and material support from Mauna Kea Technologies.  
22

23 **Trial registration:** ClinicalTrials.gov NCT06079970.  
24

25 **Keywords:** Respiratory tract neoplasms, bronchoscopy, confocal laser scanning microscopy, nCLE,  
26 rapid-on-site evaluation (ROSE), histology/cytology, lung cancer, peripheral lung nodule  
27

28 **Manuscript word count:** 4187  
29  
30  
31

## 32 Article summary

### 33 Strengths and limitations

- 34 • This is the first (international multicenter) randomized controlled trial on needle-based confocal  
35 laser endomicroscopy (nCLE) for bronchoscopic diagnosis of peripheral lung nodules.
- 36 • This study provides the opportunity to evaluate the added benefit of the nCLE technique to  
37 conventional diagnostic bronchoscopy including radial EBUS in multiple centers and countries.
- 38 • The definition of diagnostic yield is under debate. In this study, the diagnostic yield will be  
39 reported based on two different definitions for better comparison with existing and future  
40 studies.
- 41 • Each participating center uses their own methods for conventional bronchoscopic diagnosis of  
42 peripheral lung nodules and will therefore not be completely uniform across all centers. Each  
43  
44  
45  
46  
47  
48  
49  
50  
51  
52  
53  
54  
55  
56  
57  
58  
59  
60

1  
2  
3 center will keep conventional methods uniform in both the control and intervention group to  
4 ensure differences can be attributed to the nCLE technique.  
5

- 6 • In this study only peripheral pulmonary nodules between 1 – 3 cm are included.  
7  
8  
9  
10  
11  
12  
13  
14  
15  
16  
17  
18  
19  
20  
21  
22  
23  
24  
25  
26  
27  
28  
29  
30  
31  
32  
33  
34  
35  
36  
37  
38  
39  
40  
41  
42  
43  
44  
45  
46  
47  
48  
49  
50  
51  
52  
53  
54  
55  
56  
57  
58  
59  
60

For peer review only

## Introduction

Lung cancer remains the leading cause of cancer-related deaths, with 2.09 million new diagnoses and 1.76 million deaths worldwide per year.(1, 2) The increased use of chest computed tomography (CT) and the future implementation of low-dose CT lung cancer screening result in an increased detection of lung nodules.(3, 4) Consequently, more early-stage lung cancer is detected, which is most often located in the periphery of the lung.(5, 6) Depending on lesion characteristics and associated risk factors, tissue sampling is needed to establish a definitive diagnosis and determine the appropriate treatment.

Bronchoscopic analysis of peripheral lung nodules remains challenging despite many technological innovations. The procedure comprises three essential pillars needed for a diagnostic success: navigation to the lesion, confirmation of tool location within the lesion (i.e., tool-in-lesion confirmation) and successful tissue sampling. In the past years, fluoroscopy, radial probe endobronchial ultrasound (r-EBUS), electromagnetic navigation (EMN), virtual bronchoscopy (VB) or cone beam computed tomography (CBCT) combined with augmented fluoroscopy have improved navigation with or without tool-in-lesion confirmation.(7) Additionally, rapid on-site evaluation (ROSE) is sometimes used for direct feedback on representativeness of the sample and forming a preliminary diagnosis. Nevertheless, diagnostic yield rarely exceeds 71%,(8) as it depends highly on factors such as nodule size, bronchus sign on pre-procedural CT, eccentric vs. concentric r-EBUS pattern, pre-test probability of malignancy and sampling tools used.(9-12) The arrival of robotic bronchoscopy platforms combined with existing techniques have shown promising results with high navigation success rates. However, diagnostic yield remains behind due to substantial mispositioning rates, retaining a large gap between navigation success and diagnostic yield.(13-15) The persistently low diagnostic yield calls for complementary techniques providing real-time information for fine-tuning the needle position.

Confocal laser endomicroscopy (CLE) is a high-resolution microscopic technique that visualizes individual cells in real-time. It has proven useful in the gastroenterology field, where it has been demonstrated that CLE could be used for rapid diagnosis, targeting of biopsies, and prediction of neoplasms.(16) CLE has been recently introduced in the respiratory tract, including for the peripheral lung nodule analysis.(17-19) CLE probes are thin enough to fit through 18G biopsy needles to provide microscopic feedback at the tip of the needle (needle-based CLE (nCLE)). Fluorescein dye is used as a contrast agent and binds to the extracellular matrix, resulting in a highly fluorescent background in which individual cells can be seen. Previous studies have identified three nCLE image characteristics

1  
2  
3 for malignancy in the lung,(19) and criteria for airway and lung parenchyma.(18) The identification of  
4 malignancy and distinction from airway and lung parenchyma were accurate based on these  
5 criteria.(18, 19)  
6  
7

8 A recent study demonstrated a high needle mispositioning rate, as nCLE-imaging resulted in a  
9 repositioning of the biopsy needle in 9 out of 20 patients.(20) nCLE could therefore potentially bridge  
10 the gap between navigation success and diagnostic yield.  
11  
12  
13

14  
15 To date, larger studies investigating the effect of the addition of nCLE to bronchoscopic peripheral  
16 lung nodule analysis are lacking. The improved diagnostic yield could reduce the necessity further or  
17 more invasive diagnostic interventions such as CT-guided transthoracic biopsies or diagnostic surgery.  
18 In this multicenter randomized controlled trial, we aim to investigate if nCLE-imaging integrated with  
19 conventional bronchoscopy results in a higher diagnostic yield compared to conventional  
20 bronchoscopy without nCLE in diagnosing peripheral lung nodules.  
21  
22  
23  
24  
25

## 26 **Methods and analysis**

### 27 **Study design**

28  
29 This study is an investigator-initiated, international, multicenter, parallel-group randomized  
30 controlled trial comparing two bronchoscopy procedures (with or without nCLE) for the diagnosis of  
31 suspected peripheral lung nodules. The study flowchart is shown in Figure 1.  
32  
33  
34  
35  
36  
37  
38

### 39 **Participating centers**

40  
41 The study is executed in university or general hospitals in six countries in Europe and one hospital in  
42 the United States. Study inclusion started on 18 October 2023. Other centers will start including in  
43 2024 and the estimated duration of the study is 24 months including follow up.  
44  
45  
46  
47

### 48 **Randomization**

49  
50 After the participant has given written informed consent, patient data is entered into a digital  
51 database (CASTOR Electronic Data Capture (EDC) electronic case report form (eCRF)). We will use a  
52 web-based block-randomization module in Castor to randomize participants into the control and  
53 interventional group (1:1). Randomization will be stratified by participating center to ensure that the  
54 nCLE and non-nCLE group is of the same size in each center. As nodule size has significant impact on  
55  
56  
57  
58  
59  
60

1  
2  
3 diagnostic yield,(8) we will stratify for nodule size ( $\leq 20$  mm and  $>20$  mm) to ensure that size is evenly  
4 distributed across study arms.  
5  
6  
7

8 Patients and endoscopists will not be blinded since the physician needs to know if nCLE images must  
9 be acquired during bronchoscopy. Pathologists will be blinded to procedure type and raters who will  
10 analyze the nCLE videos after the procedure will be blinded to the patient history and  
11 histopathological outcome of the tissue samples.  
12  
13  
14

## 15 16 17 **Study population**

18  
19 Consecutive patients will be recruited by their treating physician at pulmonology outpatient clinics of  
20 participating centers. Patients are eligible for inclusion if they meet the following inclusion criteria:  
21

- 22 1.  $\geq 18$  years of age
- 23 2. Suspected malignant peripheral lung lesion with an indication for a bronchoscopic diagnostic  
24 work-up as determined by the attending physician or tumor board. Peripheral pulmonary  
25 lesions are defined as lesions located beyond the visible segmental bronchi, not detectable by  
26 regular flexible bronchoscopy
- 27 3. Bronchus sign on pre-procedural CT or estimated confidence for successful navigation to the  
28 nodule resulting in a r-EBUS signal
- 29 4. Solid part of the lesion must be  $\geq 10$  mm
- 30 5. Largest dimension of lesion size on CT  $\leq 30$  mm (long-axis)
- 31 6. Ability to understand and willingness to sign a written informed consent

32  
33  
34  
35  
36  
37  
38  
39  
40  
41 A potential subject who meets any of the following criteria will be excluded from participation in this  
42 study:  
43

- 44 1. Inability or non-willingness to provide informed consent
- 45 2. Endobronchial visible malignancy on bronchoscopic inspection
- 46 3. Target lesion within reach of the linear EBUS scope
- 47 4. Failure to comply with the study protocol
- 48 5. Known allergy or risk factors for an allergic reaction to fluorescein
- 49 6. Pregnancy or breastfeeding
- 50 7. Hemodynamic instability
- 51 8. Refractory hypoxemia
- 52 9. Therapeutic anticoagulant use that cannot be withheld for an appropriate interval before the  
53 procedure  
54  
55  
56  
57  
58  
59  
60

10. Unable to tolerate general anesthesia according to the anesthesiologist
11. Undergoing chemotherapy as several chemotherapies have fluorescent properties at the same wavelength (e.g., doxorubicin)

### Primary outcome measure

Diagnostic yield (defined as the proportion of patients in whom the bronchoscopic procedure results in a definitive diagnosis [either malignant, specific benign or non-specific benign confirmed as benign in follow-up], relative to the total number of patients that underwent the diagnostic bronchoscopic procedure). If patients with multiple lesions are included, the diagnostic yield will be computed per nodule.

### Secondary outcome measures

1. Diagnostic sensitivity for malignancy (defined as the proportion of patients in whom the bronchoscopic procedure diagnoses malignancy relative to the total number of patients with a final diagnosis of malignancy as determined by the reference standard).
2. Diagnostic yield according to the strict definition by Vachani et al.(21) (defined as the proportion of patients in whom the bronchoscopic procedure results in a definitive diagnosis [either malignant or specific benign diagnosis], relative to the total number of patients that underwent the diagnostic bronchoscopic procedure).
3. Procedure duration (from bronchoscope insertion until removal).
4. Percentage of patients in which the needle was fine-tuned (defined as moving the needle within the same distal airway) or repositioned (defined as the selection of a different distal airway for tissue sampling) based on nCLE feedback (defined as the number of patients the needle was fine-tuned/repositioned divided by the total number of patients in which nCLE imaging was used).
5. Fluoroscopy radiation time and dose.
6. Diagnostic yield of ROSE (defined as the proportion of patients in whom ROSE resulted in a classifying diagnosis [malignant or specific benign diagnosis], relative to the total number of patients).
7. Proportion of patients in which ROSE provided tool-in-lesion confirmation, meaning that the acquired tissue shows signs of a malignant or non-malignant diagnosis and was not related to airway/lung parenchyma sampling such as bronchus epithelium/blood contamination, and tissue not suitable for a specific diagnosis such as atypical cells.



- 1
  - 2
  - 3
  - 4
  - 5
  - 6
  - 7
  - 8
  - 9
  - 10
  - 11
  - 12
  - 13
  - 14
  - 15
  - 16
  - 17
  - 18
  - 19
  - 20
  - 21
  - 22
  - 23
  - 24
  - 25
  - 26
  - 27
  - 28
  - 29
  - 30
  - 31
  - 32
  - 33
  - 34
  - 35
  - 36
  - 37
  - 38
  - 39
  - 40
  - 41
  - 42
  - 43
  - 44
  - 45
  - 46
  - 47
  - 48
  - 49
  - 50
  - 51
  - 52
  - 53
  - 54
  - 55
  - 56
  - 57
  - 58
  - 59
  - 60
8. Complication rate (defined as any complication or complication categories occurring during or directly after the bronchoscopic procedure or any procedure-related complication within one week after the procedure).
  9. Requirement of additional diagnostic procedures (CT-guided transthoracic biopsies, surgical diagnostics and/or additional bronchoscopy) during the 6-month follow-up period.

### Exploratory endpoints

As an exploratory endpoint, we aim to identify potential new nCLE image characteristics for malignant and benign pathologies. We will also create an algorithm for automated nCLE criteria recognition using machine- or deep-learning methods.

### Outcome parameters

Table 1 shows the baseline patient characteristics and corresponding procedural information that will be collected at the time of study inclusion, during the procedure and 6-month follow-up period.

### Investigational product

The Cellvizio® confocal laser endomicroscopy system with the corresponding AQ-Flex™ 19 miniprobe (Mauna Kea technologies (MKT), Paris, France) is the investigational medical device of this study. The probe has a compatible operating diameter of 0.91 mm, a resolution of 3,5 µm, a penetration depth of 40 to 50 µm and a maximum field of view of 325 µm. The device and corresponding probes are CE-marked and will be used within the intended purpose.(22)

The technique uses a laser beam (488 nm) focused by an objective lens to illuminate the tissue, with the illumination focus at a pre-defined depth. The light strikes the tissue resulting in fluorescent light emission back from autofluorescent structures such as elastin in the airways or an exogenous fluorescent dye such as fluorescein, a contrast dye used for nCLE imaging in the lung. Light originating from the focal layer will be focused by the objective lens at the opening of a pinhole and detected, while light from out-of-focus layers is rejected by the pinhole. This results in high-resolution imaging of individual cells and structures at a specific point with limited influence of (scattered) light from out-of-focus areas.(22)

Table 1: Data to be collected

|                                                                                                                                                                                                                                    |
|------------------------------------------------------------------------------------------------------------------------------------------------------------------------------------------------------------------------------------|
| <b>Patient characteristics</b>                                                                                                                                                                                                     |
| Age                                                                                                                                                                                                                                |
| Sex                                                                                                                                                                                                                                |
| BMI                                                                                                                                                                                                                                |
| Smoking history                                                                                                                                                                                                                    |
| Patient cancer history                                                                                                                                                                                                             |
| Family history of lung cancer                                                                                                                                                                                                      |
| <b>Pre-procedural (PET)CT scan lesion characteristics</b>                                                                                                                                                                          |
| CT scan quality (slice thickness)                                                                                                                                                                                                  |
| Size (largest diameter)                                                                                                                                                                                                            |
| Localization (segmental level)                                                                                                                                                                                                     |
| Lesion appearance/nodule type (Solid, non-solid/ground glass, partially solid)                                                                                                                                                     |
| Bronchus sign (present(concentric/eccentric )/absent/insufficient CT scan quality)                                                                                                                                                 |
| Spiculation sign (present/absent)                                                                                                                                                                                                  |
| Emphysema (present/absent)                                                                                                                                                                                                         |
| PET uptake (not performed/no uptake/faint ( $SUV < 1$ )/moderate ( $SUV 1 - 2.5$ ) /intense ( $SUV > 2.5$ ))                                                                                                                       |
| <b>Intra-procedural information</b>                                                                                                                                                                                                |
| r-EBUS sign (eccentric, concentric, absent)                                                                                                                                                                                        |
| Location of tissue sampling (lung segment)                                                                                                                                                                                         |
| nCLE image observations (for every needle pass)                                                                                                                                                                                    |
| Needle fine-tuning & repositioning done (for every needle pass)                                                                                                                                                                    |
| Sampling techniques used (TBNA, (cryo)biopsy, brush)                                                                                                                                                                               |
| ROSE results of tissue sample (if available)                                                                                                                                                                                       |
| Bronchoscopy start and end time                                                                                                                                                                                                    |
| Fluoroscopy duration                                                                                                                                                                                                               |
| Additional procedures performed (e.g., EBUS/EUS-B/etc.)                                                                                                                                                                            |
| (Serious) complications                                                                                                                                                                                                            |
| <b>Post-procedural information</b>                                                                                                                                                                                                 |
| (Serious) complications (up to 1 week after the procedure)                                                                                                                                                                         |
| Final pathological diagnosis (cytology and/or histology)                                                                                                                                                                           |
| (Additional) Diagnostic follow-up procedures needed (e.g., transthoracic needle biopsies, surgery, additional bronchoscopy, follow-up imaging) including (altered) diagnosis and/or results of follow-up CT-scans of the lesion(s) |

*RUL: right upper lobe; RML: right middle lobe; RLL; right lower lobe; LUP: left upper lobe; LLL: left lower lobe; CT: computed tomography; ROSE: rapid on-site evaluation; r-EBUS: radial endobronchial ultrasound; TBNA: transbronchial needle aspiration; SUV: standard uptake value*

## Study procedures

### Conventional diagnostic bronchoscopy (control group & intervention group)

The following procedure will be performed routinely (regardless of study participation): Bronchoscopic procedures will be performed by experienced pulmonologists specifically trained in navigational bronchoscopy and nCLE-imaging. All procedures are performed according to institutional practice, usually on an outpatient basis. Patient preparation and sedation will be done according to institutional practice and might include propofol or midazolam sedation and the use of topical anesthesia. Vital parameters will be monitored during and after the procedure.

Systematic bronchoscopic inspection of the airways will be performed, followed by r-EBUS imaging (guide sheath optional) to select the distal airway with the highest probability of reaching the lesion. The use of fluoroscopy, EMN, VB or ultrathin bronchoscope is optional if regularly used at that institution. CBCT navigation with or without augmented fluoroscopy and robotic bronchoscopy will not be used in patients included in this trial. Bronchoscopist may use these techniques after following all actions related to this protocol while ensuring tissue samples are processed separately. Transbronchial needle aspirations (TBNA) using the 18G FleXNeedle® (Broncus Medical Inc., San Jose, United States of America) and (cryo)biopsies will be performed to acquire tissue for pathological evaluation (a recommended minimum of 3 TBNA and 3 biopsies). During the bronchoscopic work up, some of the cytological aspirations will be evaluated on site (Rapid onsite evaluation, ROSE) and the representativeness of the samples will be reported to the bronchoscopist. ROSE will always be performed for the first TBNA pass. For the following passes, the bronchoscopist decides if it is indicated.

### Addition of nCLE imaging (intervention group)

The same procedure will be performed as described above for the patients randomized to the intervention arm, except for the addition of fluorescein administration and nCLE imaging before TBNA. Prior to the procedure, an 18G needle is preloaded with the CLE probe (AQ-Flex™ 19 Miniprobe, Mauna Kea Technologies, Paris, France). The CLE probe is advanced through the needle until the probe is positioned approximately 4 mm past the needle tip and secured using a locking device to maintain the probe position relative to the needle tip.

1  
2  
3 After determining the sample location based on r-EBUS and/or fluoroscopy, fluorescein (2.5 mL of 10%  
4 fluoresceindinatrium solution) is administered intravenously. Then, the preloaded 18G needle  
5 punctures the target area, followed by the insertion of the CLE probe through the biopsy needle for  
6 real-time microscopic feedback. In case nCLE visualizes airway or lung parenchyma, indicating a near-  
7 miss, the biopsy needle is fine-tuned (i.e., the needle is moved within the same distal airway) or  
8 repositioned (i.e., a different distal airway is chosen). If nCLE demonstrates that the biopsy needle is  
9 placed within the lesion, the CLE probe is removed from the biopsy needle while holding the needle  
10 in position, followed by tissue sampling at the same location (repeated for at least 3 TBNA). A  
11 flowchart of the procedure steps for both the conventional bronchoscopy and the nCLE-guided  
12 bronchoscopy is shown in Figure 2.

### 21 **nCLE image interpretation**

22  
23 The airway and lung parenchyma nCLE criteria as described by Kramer et al.(18) will be considered as  
24 “out-of-lesion” criteria indicating mispositioning of the needle. Currently known criteria for “tool-in-  
25 lesion” are malignancy criteria and granuloma criteria.(18, 19, 23) nCLE images will be interpreted  
26 during the procedure by the performing bronchoscopist and their team. Additionally, all videos are  
27 rated post-procedure by blinded raters of the initiating center to establish a ground truth  
28 interpretation of the images.

### 35 **Pathological examination**

36  
37 The cytological and histological examination will be done according to standard hospital procedure. In  
38 case the bronchoscopic procedure is considered non-diagnostic, additional procedures (transthoracic  
39 needle aspiration, surgical procedure, etc.) could follow to obtain a definite diagnosis. Results of the  
40 nCLE imaging do not influence the indication for additional diagnostic procedures. If a surgical  
41 procedure is indicated, the histological images will be collected to compare this with the nCLE imaging.

42  
43 In this study, the final pathological diagnosis will be subdivided into four categories as described by  
44 Vachani et al.,(21) namely [1] malignant, [2] non-malignant, which is divided into specific benign  
45 (including granulomatous, infectious and lymphocyte-predominant patterns) or nonspecific benign  
46 (e.g. inflammation), and [3] non-diagnostic (i.e., insufficient material for classifying diagnosis or in case  
47 atypical cells could not be classified further).

### 57 **Reference standard**

1  
2  
3 For the primary outcome, diagnostic yield will be calculated using the intermediate method described  
4 by Vachani et al.(21) The abovementioned final pathological diagnosis categories will be used  
5 regardless of the results of the reference standard, except for initial non-specific benign diagnoses. In  
6 these cases, results from the reference standard will be considered. If the initial benign diagnosis is  
7 confirmed benign in follow-up, the bronchoscopic procedure will be considered diagnostic.  
8

9  
10 For the calculation of diagnostic sensitivity, malignant cases identified by the procedures under  
11 investigation will be considered as true positive since false positive results (almost) never occur.  
12 Benign (either specific or non-specific) and non-diagnostic samples will undergo a reference standard,  
13 which can be a subsequent sampling method such as transthoracic needle biopsy or surgery.  
14 Alternatively, if no subsequent sampling method is performed, clinical and radiological follow-up at 6  
15 months is considered the reference standard. If follow-up CT imaging shows regression or resolution  
16 of the nodule or in case a nodule remains stable, it will be considered as a confirmation of non-  
17 malignant diagnosis (i.e., true negative). Cases that are benign (either specific or non-specific) or non-  
18 diagnostic at the index bronchoscopy will be considered false negative if a malignancy diagnosis is  
19 established by the reference standard or if therapeutic procedures are done without confirmation of  
20 diagnosis. Figure 3 gives a schematic overview of the calculation methods of diagnostic yield and  
21 sensitivity for malignancy.  
22  
23  
24  
25  
26  
27  
28  
29  
30  
31  
32

### 33 **Informed consent procedure**

34  
35 Patients will be recruited by their treating physician. If the patient is willing to receive more  
36 information about study participation, information will be provided by the local investigator. The  
37 eligible participants will have sufficient time to consider their consent. Written informed consent must  
38 be provided before any study-related procedures take place. After informed consent, patients will be  
39 randomized using Castor EDC software and assigned to the control or intervention group. The  
40 bronchoscopy will then be performed according to the study protocol. In case patients decline  
41 participation in the study, they will be treated to the usual local clinical practices and guidelines.  
42  
43  
44  
45  
46  
47

### 48 **Quality assurance**

49  
50 Only experienced pulmonologists will perform the procedures to ensure high-quality bronchoscopic  
51 procedures. Additionally, all participating centers will be trained in the use of the CLE Cellvizio device  
52 and to maintain homogeneous quality of the nCLE image acquisition and interpretation over all  
53 centers. Training entails theoretic and practical training by the initiating center with extensive nCLE  
54 experience and MKT representatives.  
55  
56  
57  
58  
59  
60

## Sample size justification

Based on previous studies and meta-analyses, we expect the diagnostic yield in patients with a lesion <30 mm in the conventional bronchoscopy arm to be 62%.<sup>(24, 25)</sup> We hypothesize that additional nCLE guidance in the intervention arm will result in a diagnostic yield of 80%. In total, 198 patients are needed to show that nCLE guidance results in a diagnostic yield that is 18 percent point higher than the conventional bronchoscopy arm ( $\alpha=0.05$  and  $\text{power}=0.80$ ). Taking into account a 5% study drop-out, a total of 208 patients will be included. We believe an increase in the diagnostic yield (from 62% to 80%) demonstrates a clinically relevant improvement in lung cancer diagnosis.

## Data analysis

Results for continuous variables will be expressed as means and standard deviations or medians with interquartile ranges. Categorical variables will be expressed as frequencies and percentages. The Chi-squared test will be used to compare diagnostic yield (or other comparisons between categorical variables) between the two randomization groups. Continuous variables will be compared using Student's t-test, or Mann-Whitney-U tests. A two-tailed P-value <0.05 will be considered statistically significant. All analyses are done based on an intention-to-treat approach, meaning that patients are analyzed as part of the intervention group they were assigned to, even if nCLE imaging was not executed in a patient in the intervention arm due to unforeseen circumstances. These specific cases will be reported in the manuscript. Patients not undergoing the planned bronchoscopy procedure after randomization are excluded from the analysis. Patients with missing outcome data will be excluded from analysis. Patients with incomplete essential follow-up information will also be excluded from the calculation of diagnostic sensitivity. However, we will also calculate diagnostic sensitivity based on a 'worst-case scenario', in which these patients are considered false negatives. For the primary outcome, subgroup analysis will be performed for several lesions and procedural characteristics (lesion size ( $\leq 20$  mm vs  $> 20$  mm), radial EBUS image (eccentric vs concentric vs absent), location (upper lobe (without lingual) vs middle lobe/lingual vs lower lobe), pre-test probability that the nodule is cancerous (<10%, 10 – 35%, 36-70% and >70%) based on the Brock score.<sup>(26)</sup>

## Patient and Public Involvement statement

There was no patients or public involvement in the design of this study. An original research manuscript will be prepared to present the study results.

## Ethics, amendments and dissemination

The CLEVER study will be conducted in accordance with the Declaration of Helsinki (64th WMA General Assembly, Fortaleza, Brazil, October 2013) and the Medical Research Involving Human Subjects Act (WMO, The Netherlands) principles. To date, the Medical Ethical Committee of the Amsterdam UMC (NL83257.018.22), Athens Chest Hospital (21583/25-08-23) and General University Hospital in Prague (č.j. 143/23 S) have approved the study. All participating sites will obtain local ethical approval prior to starting inclusions. Written informed consent will be obtained prior to randomization and any study-related procedures. In case of major changes to the protocol, the ethical review board will be notified, and it will be communicated with all participating centers and registered on [clinicaltrials.gov](https://clinicaltrials.gov).

## Data management and safety

After informed consent, the patient will be given a code. This code will be used on all (pseudonymized) data, including CLE images and electronic Case Report Form (eCRF) data. Castor Electronic Data Capture ecosystem (International Organization of Standardization (ISO) 27001 and 9001 certified) will be used to collect key patient information described in outcome parameters. The key to the code is safeguarded by the local principal investigator and access to all records is limited to directly involved researchers. The coordinating investigator will centralize patients' data, and principal investigators will have direct access to their own site's data sets and to other sites' data upon reasonable request. All principal investigators will maintain records, including signed patient informed consent forms and information on adverse events.

Data management of all data (collection, storage, and analysis) will be done according to the local data management plan. All records will be stored for a period of 15 years following the completion or termination of the study. Monitoring will be done according to a monitoring plan with specific attention paid to informed consent, completion of the eCRF, and storage of CLE video data.

## Patient safety and adverse events

The study was deemed a negligible risk study (according to the Nederlandse Federatie van Universitaire Medisch Centra (NFU) descriptions) by the ethical committee of the Amsterdam UMC. Previous study publications showed that nCLE-imaging and intravenous fluorescein administration are safe.<sup>(27)</sup> Fluorescein adverse reactions are rare and mostly mild in nature. No study related adverse

1  
2  
3 events occurred in the prior bronchoscopic nCLE studies in the Amsterdam UMC.(18, 19) Estimated  
4 prolonged endoscopy time due to study participation is approximately 10 minutes. Patients will not  
5 be aware of this as they will already be sedated for the bronchoscopic procedure.  
6  
7  
8

9  
10 In case any (serious) adverse event ((S)AE) occur during the procedure or up to one week after the  
11 procedure, the sponsor will register SAEs through the web portal *Toetsingonline* to the accredited  
12 METC that has approved the protocol. Adverse events are defined as any undesirable experience  
13 occurring to a subject during the study, whether or not considered related to the trial procedure. The  
14 severity and possible relatedness to the investigational product or the procedure will be documented.  
15 Investigators of the participating centers will report all serious adverse events to the coordinating and  
16 principal investigator of the initiating site. Reporting of SAEs that result in death or are life-threatening  
17 will be done within 7 days after initial identification, followed by a period of a maximum of 8 days to  
18 complete the preliminary report. All other SAEs will be reported within 15 days after first knowledge  
19 of the SAE.  
20  
21  
22  
23  
24  
25  
26  
27  
28

### 29 **Annual progress report**

30  
31 The sponsor will ensure that a progress report is submitted to the medical ethics committee once a  
32 year. Information on the start date of inclusion, number of subjects included to date, number of  
33 subjects that have completed participation, serious adverse events, and amendments.  
34  
35  
36  
37  
38  
39

### 40 **Amendments**

41  
42 Substantive protocol amendments will be assessed by the METC Amsterdam UMC. A substantial  
43 amendment is already incorporated in this publication. In the course of subject screening, it was  
44 observed that certain patients, integral to the population that could potentially benefit from nCLE,  
45 were excluded. Initially presence of a positive bronchus sign was obligatory. After inclusion of 12  
46 patients, we also include patients if the bronchoscopist has estimated confidence for successful  
47 navigation to the nodule resulting in a r-EBUS signal without a clear bronchus sign on chest CT. As only  
48 5% of patients were included at a single center at the moment of the change, effects on the outcomes  
49 are negligible. In the event of other substantial amendments, all changes with a rationale will be  
50 reported in future publications arising from this protocol.  
51  
52  
53  
54  
55  
56  
57  
58  
59  
60



## Dissemination

We aim to publish the study results in a peer-reviewed journal. Reporting will be in line with CONSORT and STARD 2015 reporting guidelines.(28, 29)

## Discussion

In this multicenter, investigator-initiated, randomized controlled trial, we aim to determine if the addition of nCLE-imaging to bronchoscopic peripheral lung lesion analysis results in an improved diagnostic yield.

Since there still is a gap between the success rate of navigating the tissue sampling instrument toward the target lesion and the final diagnostic yield, there is a need for real-time tool-in-lesion confirmation. The addition of high-resolution microscopic nCLE imaging at the tip of the needle could potentially lead to a decrease in mispositioning rates and an improved diagnostic yield. As a result, fewer patients would need additional diagnostic procedures such as transthoracic needle biopsy or surgery, which are more invasive and have higher incidences of complications such as pneumothorax and hemorrhage.(30) Previous smaller studies have already shown that nCLE is safe, and raters can distinguish different image characteristics with high accuracy. On top of that, it has also been demonstrated that fine-tuning the needle based on these image characteristics is often done, even when navigation to the lesion was successful.(18-20) However, nCLE image interpretation remains subjective and challenging, especially when interpreting images live in the bronchoscopy suite. As described by Tian et al.(31), the role of artificial intelligence might be important to make the technique routinely implementable in clinical practice. An exploratory endpoint of this study is to develop a deep-learning network for automated image interpretation. This is the first step towards easier, quicker and reproducible image interpretation.

Current literature on nCLE imaging for this purpose remains limited to smaller patient groups and the clinical benefit remains to be demonstrated. The results of the CLEVER study provide a formal comparison between conventional image-guided diagnostic bronchoscopy and conventional bronchoscopy with the addition of nCLE in a large randomized patient group. The results of this trial will clarify the added benefit of nCLE for bronchoscopic diagnosis of peripheral lung nodules and identify which patients could benefit from the use of this technique.

## Author contributions

SvH, TK, DAK, DMdB, PIB and JTA were involved in conception and trial design. SvH, TK, DAK, PIB and JTA were involved in drafting of the study protocol. DAK provided statistical expertise. All authors were involved in editing and final approval of the protocol. SvH, DG, CB, JH, MH, VP, CR, AS, GS, EK, NA, JV, ZS, MAH, JMAD, PIB and JTA will be involved in the conduct of the study and data acquisition. SvH, DAK, DMdB, PIB and JTA will be involved in the data analysis and interpretation. SvH, DAK, PIB and JTA will be involved in drafting of the final manuscript for dissemination. All authors will provide editing and approval of the final manuscript for publication.

## Funding

This is an investigator-initiated study with financial and material support from Mauna Kea Technologies (9 Rue d'Enghien, 75010 Paris, France). The funder has no role in study design, data collection and analysis, decision to publish, or preparation of the manuscript.

## Declaration of interests

JTA declares material and financial support to the sponsor's institution from Mauna Kea Technologies for this study.

## Data sharing statement

The final trial dataset will be available to study investigators on completion of the trial, and after publication of the primary manuscript. All data relevant to the study will be included in the article or uploaded as supplementary information. Data are available upon reasonable request.

## Bibliography

1. Bade BC, Dela Cruz CS. Lung Cancer 2020: Epidemiology, Etiology, and Prevention. *Clin Chest Med.* 2020;41(1):1-24. doi:10.1016/j.ccm.2019.10.001.
2. Sung H, Ferlay J, Siegel RL, et al. Global Cancer Statistics 2020: GLOBOCAN Estimates of Incidence and Mortality Worldwide for 36 Cancers in 185 Countries. *CA: A Cancer Journal for Clinicians.* 2021;71(3):209-49. doi:10.3322/caac.21660.
3. Hoffman RM, Atallah RP, Struble RD, Badgett RG. Lung Cancer Screening with Low-Dose CT: a Meta-Analysis. *J Gen Intern Med.* 2020;35(10):3015-25. doi:10.1007/s11606-020-05951-7.
4. Hyltdgaard C, Trolle C, Harders SMW, et al. Increased use of diagnostic CT imaging increases the detection of stage IA lung cancer: pathways and patient characteristics. *BMC Cancer.* 2022;22(1):464. doi:10.1186/s12885-022-09585-2.

5. Zhang EW, Shepard JO, Kuo A, et al. Characteristics and Outcomes of Lung Cancers Detected on Low-Dose Lung Cancer Screening CT. *Cancer Epidemiol Biomarkers Prev.* 2021;30(8):1472-9. doi:10.1158/1055-9965.Epi-20-1847.
6. Horeweg N, van der Aalst CM, Thunnissen E, et al. Characteristics of lung cancers detected by computer tomography screening in the randomized NELSON trial. *Am J Respir Crit Care Med.* 2013;187(8):848-54. doi:10.1164/rccm.201209-1651OC.
7. Kramer T, Annema JT. Advanced bronchoscopic techniques for the diagnosis and treatment of peripheral lung cancer. *Lung Cancer.* 2021;161:152-62. doi:10.1016/j.lungcan.2021.09.015.
8. Kops SEP, Heus P, Korevaar DA, et al. Diagnostic yield and safety of navigation bronchoscopy: A systematic review and meta-analysis. *Lung Cancer.* 2023;180:107196. doi:10.1016/j.lungcan.2023.107196.
9. Nadig TR, Thomas N, Nietert PJ, et al. Guided bronchoscopy for the evaluation of pulmonary lesions: An updated meta-analysis. *Chest.* 2023. doi:10.1016/j.chest.2022.12.044.
10. Chen A, Chenna P, Loiselle A, et al. Radial Probe Endobronchial Ultrasound for Peripheral Pulmonary Lesions. A 5-Year Institutional Experience. *Annals of the American Thoracic Society.* 2014;11(4):578-82. doi:10.1513/AnnalsATS.201311-384OC.
11. Mondoni M, Rinaldo RF, Carlucci P, et al. Bronchoscopic sampling techniques in the era of technological bronchoscopy. *Pulmonology.* 2022;28(6):461-71. doi:10.1016/j.pulmoe.2020.06.007.
12. Tang Y, Tian S, Chen H, et al. Transbronchial lung cryobiopsy for peripheral pulmonary lesions. A narrative review. *Pulmonology.* 2023. doi:10.1016/j.pulmoe.2023.08.010.
13. Chen AC, Pastis NJ, Jr., Mahajan AK, et al. Robotic Bronchoscopy for Peripheral Pulmonary Lesions: A Multicenter Pilot and Feasibility Study (BENEFIT). *Chest.* 2021;159(2):845-52. doi:10.1016/j.chest.2020.08.2047.
14. Chaddha U, Kovacs SP, Manley C, et al. Robot-assisted bronchoscopy for pulmonary lesion diagnosis: results from the initial multicenter experience. *BMC Pulmonary Medicine.* 2019;19(1):243. doi:10.1186/s12890-019-1010-8.
15. Gex G, Pralong JA, Combescure C, et al. Diagnostic yield and safety of electromagnetic navigation bronchoscopy for lung nodules: a systematic review and meta-analysis. *Respiration.* 2014;87(2):165-76. doi:10.1159/000355710.
16. Fugazza A, Gaiani F, Carra MC, et al. Confocal Laser Endomicroscopy in Gastrointestinal and Pancreatobiliary Diseases: A Systematic Review and Meta-Analysis. *Biomed Res Int.* 2016;2016:4638683. doi:10.1155/2016/4638683.
17. Goorsenberg A, Kalverda KA, Annema J, Bonta P. Advances in Optical Coherence Tomography and Confocal Laser Endomicroscopy in Pulmonary Diseases. *Respiration.* 2020;99(3):190-205. doi:10.1159/000503261.
18. Kramer T, Wijmans L, de Bruin M, et al. Bronchoscopic needle-based confocal laser endomicroscopy (nCLE) as a real-time detection tool for peripheral lung cancer. *Thorax.* 2022;77(4):370-7. doi:10.1136/thoraxjnl-2021-216885.
19. Wijmans L, Yared J, de Bruin DM, et al. Needle-based confocal laser endomicroscopy for real-time diagnosing and staging of lung cancer. *Eur Respir J.* 2019;53(6). doi:10.1183/13993003.01520-2018.
20. Manley CJ, Kramer T, Kumar R, et al. Robotic bronchoscopic needle-based confocal laser endomicroscopy to diagnose peripheral lung nodules. *Respirology.* 2022. doi:10.1111/resp.14438.
21. Vachani A, Maldonado F, Laxmanan B, et al. The Impact of Alternative Approaches to Diagnostic Yield Calculation in Studies of Bronchoscopy. *Chest.* 2022;161(5):1426-8. doi:10.1016/j.chest.2021.08.074.
22. Chauhan SS, Abu Dayyeh BK, Bhat YM, et al. Confocal laser endomicroscopy. *Gastrointestinal Endoscopy.* 2014;80(6):928-38. doi:10.1016/j.gie.2014.06.021.
23. Kramer T, Wijmans L, van Heumen S, et al. Needle-based confocal laser endomicroscopy for real-time granuloma detection. *Respirology.* 2023;28(10):934-41. doi:10.1111/resp.14542.

- 1
- 2
- 3
- 4 24. Ali MS, Trick W, Mba BI, et al. Radial endobronchial ultrasound for the diagnosis of peripheral
- 5 pulmonary lesions: A systematic review and meta-analysis. *Respirology*. 2017;22(3):443-53.
- 6 doi:10.1111/resp.12980.
- 7 25. Lee J, Song JU. Diagnostic yield of radial probe endobronchial ultrasonography-guided
- 8 transbronchial biopsy without fluoroscopy in peripheral pulmonary lesions: A systematic review and
- 9 meta-analysis. *Thorac Cancer*. 2023;14(2):195-205. doi:10.1111/1759-7714.14733.
- 10 26. McWilliams A, Tammemagi MC, Mayo JR, et al. Probability of cancer in pulmonary nodules
- 11 detected on first screening CT. *N Engl J Med*. 2013;369(10):910-9. doi:10.1056/NEJMoa1214726.
- 12 27. Wallace MB, Meining A, Canto MI, et al. The safety of intravenous fluorescein for confocal
- 13 laser endomicroscopy in the gastrointestinal tract. *Aliment Pharmacol Ther*. 2010;31(5):548-52.
- 14 doi:10.1111/j.1365-2036.2009.04207.x.
- 15 28. Bossuyt PM, Reitsma JB, Bruns DE, et al. STARD 2015: an updated list of essential items for
- 16 reporting diagnostic accuracy studies. *Bmj*. 2015;351:h5527. doi:10.1136/bmj.h5527.
- 17 29. Schulz KF, Altman DG, Moher D. CONSORT 2010 statement: updated guidelines for reporting
- 18 parallel group randomised trials. *Bmj*. 2010;340:c332. doi:10.1136/bmj.c332.
- 19 30. Ho ATN, Gorthi R, Lee R, et al. Solitary Lung Nodule: CT-Guided Transthoracic Biopsy vs
- 20 Transbronchial Biopsy With Endobronchial Ultrasound and Flexible Bronchoscope, a Meta-Analysis of
- 21 Randomized Controlled Trials. *Lung*. 2023. doi:10.1007/s00408-023-00596-9.
- 22 31. Tian S, Huang H, Zhang Y, et al. The role of confocal laser endomicroscopy in pulmonary
- 23 medicine. *Eur Respir Rev*. 2023;32(167). doi:10.1183/16000617.0185-2022.
- 24
- 25
- 26
- 27
- 28
- 29
- 30
- 31
- 32
- 33
- 34
- 35
- 36
- 37
- 38
- 39
- 40
- 41
- 42
- 43
- 44
- 45
- 46
- 47
- 48
- 49
- 50
- 51
- 52
- 53
- 54
- 55
- 56
- 57
- 58
- 59
- 60

## Figure headings

Figure 1: Study flowchart. r-EBUS: radial endobronchial ultrasound; EMN: electromagnetic navigation; VB: virtual bronchoscopy; nCLE: needle-based confocal laser endomicroscopy; TBNA: transbronchial needle aspiration; PET: positron emission tomography; CT: computed tomography

Figure 2: Procedure flowchart for control and interventional group (without and with nCLE). Note: fluorescein administration is only done once before the first puncture. TBNA: transbronchial needle aspiration; ROSE: rapid on-site evaluation; EBUS: endobronchial ultrasound; EMN: electromagnetic navigation; VB: virtual bronchoscopy; nCLE: needle-based confocal laser endomicroscopy

Figure 3: Flowchart explaining calculation methods of diagnostic yield and sensitivity of malignancy. SPB: specific benign; NSB: non-specific benign; ND: non-diagnostic; TP: true positive; TN: true negative; FN: false negative; CT: computed tomography

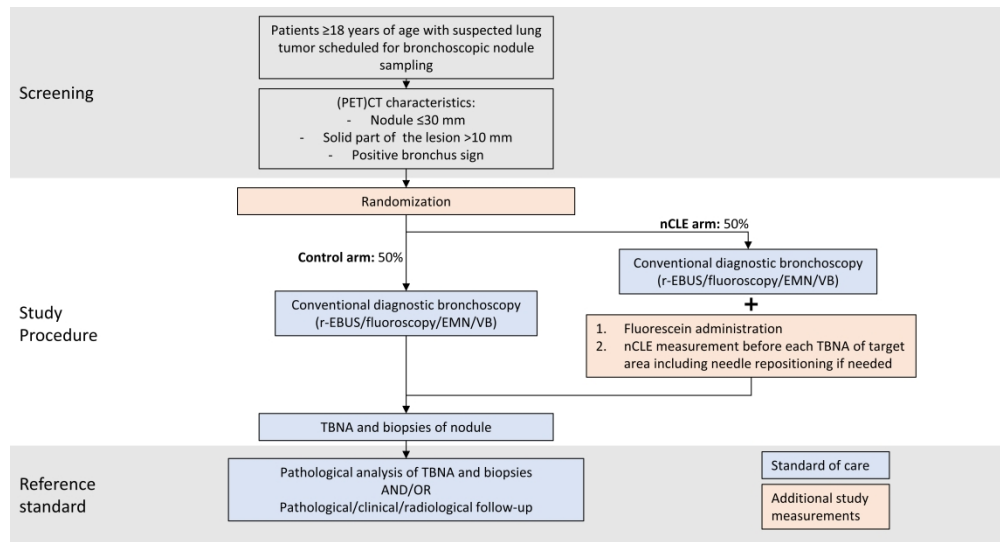

Figure 1: Study flowchart. r-EBUS: radial endobronchial ultrasound; EMN: electromagnetic navigation; VB: virtual bronchoscopy; nCLE: needle-based confocal laser endomicroscopy; TBNA: transbronchial needle aspiration; PET: positron emission tomography; CT: computed tomography

275x147mm (600 x 600 DPI)

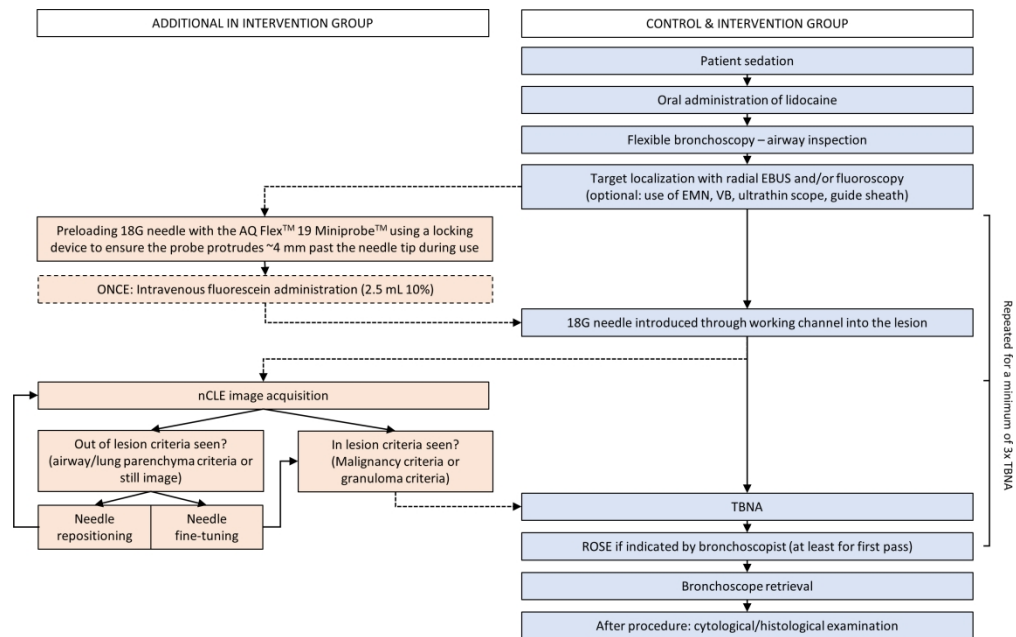

Figure 2: Procedure flowchart for control and interventional group (without and with nCLE). Note: fluorescein administration is only done once before the first puncture. TBNA: transbronchial needle aspiration; ROSE: rapid on-site evaluation; EBUS: endobronchial ultrasound; EMN: electromagnetic navigation; VB: virtual bronchoscopy; nCLE: needle-based confocal laser endomicroscopy

246x155mm (300 x 300 DPI)

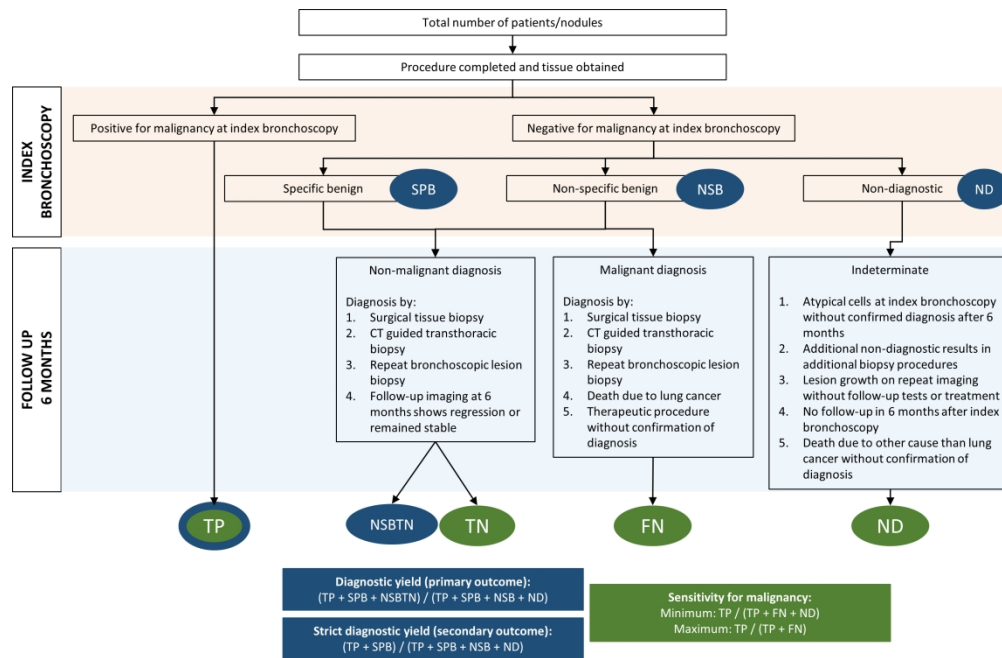

Figure 3: Flowchart explaining calculation methods of diagnostic yield and sensitivity of malignancy. SPB: specific benign; NSB: non-specific benign; ND: non-diagnostic; TP: true positive; TN: true negative; FN: false negative; CT: computed tomography

262x170mm (300 x 300 DPI)



# Reporting checklist for protocol of a clinical trial.

Based on the SPIRIT guidelines.

## Instructions to authors

Complete this checklist by entering the page numbers from your manuscript where readers will find each of the items listed below.

Your article may not currently address all the items on the checklist. Please modify your text to include the missing information. If you are certain that an item does not apply, please write "n/a" and provide a short explanation.

Upload your completed checklist as an extra file when you submit to a journal.

In your methods section, say that you used the SPIRIT reporting guidelines, and cite them as:

Chan A-W, Tetzlaff JM, Gøtzsche PC, Altman DG, Mann H, Berlin J, Dickersin K, Hróbjartsson A, Schulz KF, Parulekar WR, Krleža-Jerić K, Laupacis A, Moher D. SPIRIT 2013 Explanation and Elaboration: Guidance for protocols of clinical trials. *BMJ*. 2013;346:e7586

|                                             |                     | Reporting Item                                                                                               | Page Number |
|---------------------------------------------|---------------------|--------------------------------------------------------------------------------------------------------------|-------------|
| <b>Administrative information</b>           |                     |                                                                                                              |             |
| Title                                       | <a href="#">#1</a>  | Descriptive title identifying the study design, population, interventions, and, if applicable, trial acronym | 1           |
| Trial registration                          | <a href="#">#2a</a> | Trial identifier and registry name. If not yet registered, name of intended registry                         | 2           |
| Trial registration: data set                | <a href="#">#2b</a> | All items from the World Health Organization Trial Registration Data Set                                     | NA          |
| Protocol version                            | <a href="#">#3</a>  | Date and version identifier                                                                                  | NA          |
| Funding                                     | <a href="#">#4</a>  | Sources and types of financial, material, and other support                                                  | 15          |
| Roles and responsibilities: contributorship | <a href="#">#5a</a> | Names, affiliations, and roles of protocol contributors                                                      | 1 and 14    |

|    |                           |                     |                                                        |           |
|----|---------------------------|---------------------|--------------------------------------------------------|-----------|
| 1  | Roles and                 | <a href="#">#5b</a> | Name and contact information for the trial sponsor     | 1 and 14  |
| 2  | responsibilities:         |                     |                                                        |           |
| 3  | sponsor contact           |                     |                                                        |           |
| 4  | information               |                     |                                                        |           |
| 5  |                           |                     |                                                        |           |
| 6  |                           |                     |                                                        |           |
| 7  |                           |                     |                                                        |           |
| 8  | Roles and                 | <a href="#">#5c</a> | Role of study sponsor and funders, if any, in study    | 1, 14, 15 |
| 9  | responsibilities:         |                     | design; collection, management, analysis, and          |           |
| 10 | sponsor and funder        |                     | interpretation of data; writing of the report; and the |           |
| 11 |                           |                     | decision to submit the report for publication,         |           |
| 12 |                           |                     | including whether they will have ultimate authority    |           |
| 13 |                           |                     | over any of these activities                           |           |
| 14 |                           |                     |                                                        |           |
| 15 |                           |                     |                                                        |           |
| 16 |                           |                     |                                                        |           |
| 17 | Roles and                 | <a href="#">#5d</a> | Composition, roles, and responsibilities of the        | NA        |
| 18 | responsibilities:         |                     | coordinating centre, steering committee, endpoint      |           |
| 19 | committees                |                     | adjudication committee, data management team,          |           |
| 20 |                           |                     | and other individuals or groups overseeing the         |           |
| 21 |                           |                     | trial, if applicable (see Item 21a for data            |           |
| 22 |                           |                     | monitoring committee)                                  |           |
| 23 |                           |                     |                                                        |           |
| 24 |                           |                     |                                                        |           |
| 25 |                           |                     |                                                        |           |
| 26 |                           |                     |                                                        |           |
| 27 | <b>Introduction</b>       |                     |                                                        |           |
| 28 |                           |                     |                                                        |           |
| 29 | Background and            | <a href="#">#6a</a> | Description of research question and justification     | 3         |
| 30 | rationale                 |                     | for undertaking the trial, including summary of        |           |
| 31 |                           |                     | relevant studies (published and unpublished)           |           |
| 32 |                           |                     | examining benefits and harms for each                  |           |
| 33 |                           |                     | intervention                                           |           |
| 34 |                           |                     |                                                        |           |
| 35 |                           |                     |                                                        |           |
| 36 |                           |                     |                                                        |           |
| 37 |                           |                     |                                                        |           |
| 38 | Background and            | <a href="#">#6b</a> | Explanation for choice of comparators                  | 3         |
| 39 | rationale: choice of      |                     |                                                        |           |
| 40 | comparators               |                     |                                                        |           |
| 41 |                           |                     |                                                        |           |
| 42 |                           |                     |                                                        |           |
| 43 | Objectives                | <a href="#">#7</a>  | Specific objectives or hypotheses                      | 4         |
| 44 |                           |                     |                                                        |           |
| 45 | Trial design              | <a href="#">#8</a>  | Description of trial design including type of trial    | 4         |
| 46 |                           |                     | (eg, parallel group, crossover, factorial, single      |           |
| 47 |                           |                     | group), allocation ratio, and framework (eg,           |           |
| 48 |                           |                     | superiority, equivalence, non-inferiority,             |           |
| 49 |                           |                     | exploratory)                                           |           |
| 50 |                           |                     |                                                        |           |
| 51 |                           |                     |                                                        |           |
| 52 |                           |                     |                                                        |           |
| 53 |                           |                     |                                                        |           |
| 54 | <b>Methods:</b>           |                     |                                                        |           |
| 55 | <b>Participants,</b>      |                     |                                                        |           |
| 56 | <b>interventions, and</b> |                     |                                                        |           |
| 57 | <b>outcomes</b>           |                     |                                                        |           |
| 58 |                           |                     |                                                        |           |
| 59 |                           |                     |                                                        |           |
| 60 |                           |                     |                                                        |           |

|    |                                 |                      |                                                                                                                                                                                                                                                                                                                                                                                |         |
|----|---------------------------------|----------------------|--------------------------------------------------------------------------------------------------------------------------------------------------------------------------------------------------------------------------------------------------------------------------------------------------------------------------------------------------------------------------------|---------|
| 1  | Study setting                   | <a href="#">#9</a>   | Description of study settings (eg, community clinic, academic hospital) and list of countries where data will be collected. Reference to where list of study sites can be obtained                                                                                                                                                                                             | 4       |
| 2  |                                 |                      |                                                                                                                                                                                                                                                                                                                                                                                |         |
| 3  |                                 |                      |                                                                                                                                                                                                                                                                                                                                                                                |         |
| 4  |                                 |                      |                                                                                                                                                                                                                                                                                                                                                                                |         |
| 5  |                                 |                      |                                                                                                                                                                                                                                                                                                                                                                                |         |
| 6  |                                 |                      |                                                                                                                                                                                                                                                                                                                                                                                |         |
| 7  |                                 |                      |                                                                                                                                                                                                                                                                                                                                                                                |         |
| 8  | Eligibility criteria            | <a href="#">#10</a>  | Inclusion and exclusion criteria for participants. If applicable, eligibility criteria for study centres and individuals who will perform the interventions (eg, surgeons, psychotherapists)                                                                                                                                                                                   | 5,6     |
| 9  |                                 |                      |                                                                                                                                                                                                                                                                                                                                                                                |         |
| 10 |                                 |                      |                                                                                                                                                                                                                                                                                                                                                                                |         |
| 11 |                                 |                      |                                                                                                                                                                                                                                                                                                                                                                                |         |
| 12 |                                 |                      |                                                                                                                                                                                                                                                                                                                                                                                |         |
| 13 |                                 |                      |                                                                                                                                                                                                                                                                                                                                                                                |         |
| 14 |                                 |                      |                                                                                                                                                                                                                                                                                                                                                                                |         |
| 15 | Interventions: description      | <a href="#">#11a</a> | Interventions for each group with sufficient detail to allow replication, including how and when they will be administered                                                                                                                                                                                                                                                     | 9,10    |
| 16 |                                 |                      |                                                                                                                                                                                                                                                                                                                                                                                |         |
| 17 |                                 |                      |                                                                                                                                                                                                                                                                                                                                                                                |         |
| 18 |                                 |                      |                                                                                                                                                                                                                                                                                                                                                                                |         |
| 19 |                                 |                      |                                                                                                                                                                                                                                                                                                                                                                                |         |
| 20 | Interventions: modifications    | <a href="#">#11b</a> | Criteria for discontinuing or modifying allocated interventions for a given trial participant (eg, drug dose change in response to harms, participant request, or improving / worsening disease)                                                                                                                                                                               | NA      |
| 21 |                                 |                      |                                                                                                                                                                                                                                                                                                                                                                                |         |
| 22 |                                 |                      |                                                                                                                                                                                                                                                                                                                                                                                |         |
| 23 |                                 |                      |                                                                                                                                                                                                                                                                                                                                                                                |         |
| 24 |                                 |                      |                                                                                                                                                                                                                                                                                                                                                                                |         |
| 25 |                                 |                      |                                                                                                                                                                                                                                                                                                                                                                                |         |
| 26 |                                 |                      |                                                                                                                                                                                                                                                                                                                                                                                |         |
| 27 | Interventions: adherence        | <a href="#">#11c</a> | Strategies to improve adherence to intervention protocols, and any procedures for monitoring adherence (eg, drug tablet return; laboratory tests)                                                                                                                                                                                                                              | 11      |
| 28 |                                 |                      |                                                                                                                                                                                                                                                                                                                                                                                |         |
| 29 |                                 |                      |                                                                                                                                                                                                                                                                                                                                                                                |         |
| 30 |                                 |                      |                                                                                                                                                                                                                                                                                                                                                                                |         |
| 31 |                                 |                      |                                                                                                                                                                                                                                                                                                                                                                                |         |
| 32 | Interventions: concomitant care | <a href="#">#11d</a> | Relevant concomitant care and interventions that are permitted or prohibited during the trial                                                                                                                                                                                                                                                                                  | 9, 10   |
| 33 |                                 |                      |                                                                                                                                                                                                                                                                                                                                                                                |         |
| 34 |                                 |                      |                                                                                                                                                                                                                                                                                                                                                                                |         |
| 35 |                                 |                      |                                                                                                                                                                                                                                                                                                                                                                                |         |
| 36 | Outcomes                        | <a href="#">#12</a>  | Primary, secondary, and other outcomes, including the specific measurement variable (eg, systolic blood pressure), analysis metric (eg, change from baseline, final value, time to event), method of aggregation (eg, median, proportion), and time point for each outcome. Explanation of the clinical relevance of chosen efficacy and harm outcomes is strongly recommended | 6,7     |
| 37 |                                 |                      |                                                                                                                                                                                                                                                                                                                                                                                |         |
| 38 |                                 |                      |                                                                                                                                                                                                                                                                                                                                                                                |         |
| 39 |                                 |                      |                                                                                                                                                                                                                                                                                                                                                                                |         |
| 40 |                                 |                      |                                                                                                                                                                                                                                                                                                                                                                                |         |
| 41 |                                 |                      |                                                                                                                                                                                                                                                                                                                                                                                |         |
| 42 |                                 |                      |                                                                                                                                                                                                                                                                                                                                                                                |         |
| 43 |                                 |                      |                                                                                                                                                                                                                                                                                                                                                                                |         |
| 44 |                                 |                      |                                                                                                                                                                                                                                                                                                                                                                                |         |
| 45 |                                 |                      |                                                                                                                                                                                                                                                                                                                                                                                |         |
| 46 |                                 |                      |                                                                                                                                                                                                                                                                                                                                                                                |         |
| 47 |                                 |                      |                                                                                                                                                                                                                                                                                                                                                                                |         |
| 48 |                                 |                      |                                                                                                                                                                                                                                                                                                                                                                                |         |
| 49 | Participant timeline            | <a href="#">#13</a>  | Time schedule of enrolment, interventions (including any run-ins and washouts), assessments, and visits for participants. A schematic diagram is highly recommended (see Figure)                                                                                                                                                                                               | 9,10,11 |
| 50 |                                 |                      |                                                                                                                                                                                                                                                                                                                                                                                |         |
| 51 |                                 |                      |                                                                                                                                                                                                                                                                                                                                                                                |         |
| 52 |                                 |                      |                                                                                                                                                                                                                                                                                                                                                                                |         |
| 53 |                                 |                      |                                                                                                                                                                                                                                                                                                                                                                                |         |
| 54 |                                 |                      |                                                                                                                                                                                                                                                                                                                                                                                |         |
| 55 |                                 |                      |                                                                                                                                                                                                                                                                                                                                                                                |         |
| 56 |                                 |                      |                                                                                                                                                                                                                                                                                                                                                                                |         |
| 57 | Sample size                     | <a href="#">#14</a>  | Estimated number of participants needed to achieve study objectives and how it was                                                                                                                                                                                                                                                                                             | 11      |
| 58 |                                 |                      |                                                                                                                                                                                                                                                                                                                                                                                |         |
| 59 |                                 |                      |                                                                                                                                                                                                                                                                                                                                                                                |         |
| 60 |                                 |                      |                                                                                                                                                                                                                                                                                                                                                                                |         |

determined, including clinical and statistical assumptions supporting any sample size calculations

Recruitment [#15](#) Strategies for achieving adequate participant enrolment to reach target sample size 11

**Methods:**  
**Assignment of interventions (for controlled trials)**

Allocation: sequence generation [#16a](#) Method of generating the allocation sequence (eg, computer-generated random numbers), and list of any factors for stratification. To reduce predictability of a random sequence, details of any planned restriction (eg, blocking) should be provided in a separate document that is unavailable to those who enrol participants or assign interventions 4,5

Allocation concealment mechanism [#16b](#) Mechanism of implementing the allocation sequence (eg, central telephone; sequentially numbered, opaque, sealed envelopes), describing any steps to conceal the sequence until interventions are assigned 4,5

Allocation: implementation [#16c](#) Who will generate the allocation sequence, who will enrol participants, and who will assign participants to interventions 4,5

Blinding (masking) [#17a](#) Who will be blinded after assignment to interventions (eg, trial participants, care providers, outcome assessors, data analysts), and how 4,5

Blinding (masking): emergency unblinding [#17b](#) If blinded, circumstances under which unblinding is permissible, and procedure for revealing a participant's allocated intervention during the trial NA

**Methods: Data collection, management, and analysis**

|    |                                                  |                      |                                                                                                                                                                                                                                                                                                                                                                                                              |          |
|----|--------------------------------------------------|----------------------|--------------------------------------------------------------------------------------------------------------------------------------------------------------------------------------------------------------------------------------------------------------------------------------------------------------------------------------------------------------------------------------------------------------|----------|
| 1  | Data collection plan                             | <a href="#">#18a</a> | Plans for assessment and collection of outcome, baseline, and other trial data, including any related processes to promote data quality (eg, duplicate measurements, training of assessors) and a description of study instruments (eg, questionnaires, laboratory tests) along with their reliability and validity, if known. Reference to where data collection forms can be found, if not in the protocol | 7, 11    |
| 2  |                                                  |                      |                                                                                                                                                                                                                                                                                                                                                                                                              |          |
| 3  |                                                  |                      |                                                                                                                                                                                                                                                                                                                                                                                                              |          |
| 4  |                                                  |                      |                                                                                                                                                                                                                                                                                                                                                                                                              |          |
| 5  |                                                  |                      |                                                                                                                                                                                                                                                                                                                                                                                                              |          |
| 6  |                                                  |                      |                                                                                                                                                                                                                                                                                                                                                                                                              |          |
| 7  |                                                  |                      |                                                                                                                                                                                                                                                                                                                                                                                                              |          |
| 8  |                                                  |                      |                                                                                                                                                                                                                                                                                                                                                                                                              |          |
| 9  |                                                  |                      |                                                                                                                                                                                                                                                                                                                                                                                                              |          |
| 10 |                                                  |                      |                                                                                                                                                                                                                                                                                                                                                                                                              |          |
| 11 |                                                  |                      |                                                                                                                                                                                                                                                                                                                                                                                                              |          |
| 12 |                                                  |                      |                                                                                                                                                                                                                                                                                                                                                                                                              |          |
| 13 |                                                  |                      |                                                                                                                                                                                                                                                                                                                                                                                                              |          |
| 14 |                                                  |                      |                                                                                                                                                                                                                                                                                                                                                                                                              |          |
| 15 | Data collection plan: retention                  | <a href="#">#18b</a> | Plans to promote participant retention and complete follow-up, including list of any outcome data to be collected for participants who discontinue or deviate from intervention protocols                                                                                                                                                                                                                    | NA       |
| 16 |                                                  |                      |                                                                                                                                                                                                                                                                                                                                                                                                              |          |
| 17 |                                                  |                      |                                                                                                                                                                                                                                                                                                                                                                                                              |          |
| 18 |                                                  |                      |                                                                                                                                                                                                                                                                                                                                                                                                              |          |
| 19 |                                                  |                      |                                                                                                                                                                                                                                                                                                                                                                                                              |          |
| 20 |                                                  |                      |                                                                                                                                                                                                                                                                                                                                                                                                              |          |
| 21 |                                                  |                      |                                                                                                                                                                                                                                                                                                                                                                                                              |          |
| 22 | Data management                                  | <a href="#">#19</a>  | Plans for data entry, coding, security, and storage, including any related processes to promote data quality (eg, double data entry; range checks for data values). Reference to where details of data management procedures can be found, if not in the protocol                                                                                                                                            | 12,13    |
| 23 |                                                  |                      |                                                                                                                                                                                                                                                                                                                                                                                                              |          |
| 24 |                                                  |                      |                                                                                                                                                                                                                                                                                                                                                                                                              |          |
| 25 |                                                  |                      |                                                                                                                                                                                                                                                                                                                                                                                                              |          |
| 26 |                                                  |                      |                                                                                                                                                                                                                                                                                                                                                                                                              |          |
| 27 |                                                  |                      |                                                                                                                                                                                                                                                                                                                                                                                                              |          |
| 28 |                                                  |                      |                                                                                                                                                                                                                                                                                                                                                                                                              |          |
| 29 |                                                  |                      |                                                                                                                                                                                                                                                                                                                                                                                                              |          |
| 30 |                                                  |                      |                                                                                                                                                                                                                                                                                                                                                                                                              |          |
| 31 |                                                  |                      |                                                                                                                                                                                                                                                                                                                                                                                                              |          |
| 32 | Statistics: outcomes                             | <a href="#">#20a</a> | Statistical methods for analysing primary and secondary outcomes. Reference to where other details of the statistical analysis plan can be found, if not in the protocol                                                                                                                                                                                                                                     | 11,12    |
| 33 |                                                  |                      |                                                                                                                                                                                                                                                                                                                                                                                                              |          |
| 34 |                                                  |                      |                                                                                                                                                                                                                                                                                                                                                                                                              |          |
| 35 |                                                  |                      |                                                                                                                                                                                                                                                                                                                                                                                                              |          |
| 36 |                                                  |                      |                                                                                                                                                                                                                                                                                                                                                                                                              |          |
| 37 |                                                  |                      |                                                                                                                                                                                                                                                                                                                                                                                                              |          |
| 38 |                                                  |                      |                                                                                                                                                                                                                                                                                                                                                                                                              |          |
| 39 | Statistics: additional analyses                  | <a href="#">#20b</a> | Methods for any additional analyses (eg, subgroup and adjusted analyses)                                                                                                                                                                                                                                                                                                                                     | 10,11,12 |
| 40 |                                                  |                      |                                                                                                                                                                                                                                                                                                                                                                                                              |          |
| 41 |                                                  |                      |                                                                                                                                                                                                                                                                                                                                                                                                              |          |
| 42 |                                                  |                      |                                                                                                                                                                                                                                                                                                                                                                                                              |          |
| 43 | Statistics: analysis population and missing data | <a href="#">#20c</a> | Definition of analysis population relating to protocol non-adherence (eg, as randomised analysis), and any statistical methods to handle missing data (eg, multiple imputation)                                                                                                                                                                                                                              | 10,11,12 |
| 44 |                                                  |                      |                                                                                                                                                                                                                                                                                                                                                                                                              |          |
| 45 |                                                  |                      |                                                                                                                                                                                                                                                                                                                                                                                                              |          |
| 46 |                                                  |                      |                                                                                                                                                                                                                                                                                                                                                                                                              |          |
| 47 |                                                  |                      |                                                                                                                                                                                                                                                                                                                                                                                                              |          |
| 48 |                                                  |                      |                                                                                                                                                                                                                                                                                                                                                                                                              |          |
| 49 | <b>Methods:</b>                                  |                      |                                                                                                                                                                                                                                                                                                                                                                                                              |          |
| 50 | <b>Monitoring</b>                                |                      |                                                                                                                                                                                                                                                                                                                                                                                                              |          |
| 51 |                                                  |                      |                                                                                                                                                                                                                                                                                                                                                                                                              |          |
| 52 |                                                  |                      |                                                                                                                                                                                                                                                                                                                                                                                                              |          |
| 53 | Data monitoring: formal committee                | <a href="#">#21a</a> | Composition of data monitoring committee (DMC); summary of its role and reporting structure; statement of whether it is independent from the sponsor and competing interests; and reference to                                                                                                                                                                                                               | 13       |
| 54 |                                                  |                      |                                                                                                                                                                                                                                                                                                                                                                                                              |          |
| 55 |                                                  |                      |                                                                                                                                                                                                                                                                                                                                                                                                              |          |
| 56 |                                                  |                      |                                                                                                                                                                                                                                                                                                                                                                                                              |          |
| 57 |                                                  |                      |                                                                                                                                                                                                                                                                                                                                                                                                              |          |
| 58 |                                                  |                      |                                                                                                                                                                                                                                                                                                                                                                                                              |          |
| 59 |                                                  |                      |                                                                                                                                                                                                                                                                                                                                                                                                              |          |
| 60 |                                                  |                      |                                                                                                                                                                                                                                                                                                                                                                                                              |          |

where further details about its charter can be found, if not in the protocol. Alternatively, an explanation of why a DMC is not needed

|    |                                      |                                                                                                                                                                                                                                    |        |
|----|--------------------------------------|------------------------------------------------------------------------------------------------------------------------------------------------------------------------------------------------------------------------------------|--------|
| 1  |                                      |                                                                                                                                                                                                                                    |        |
| 2  |                                      |                                                                                                                                                                                                                                    |        |
| 3  |                                      |                                                                                                                                                                                                                                    |        |
| 4  |                                      |                                                                                                                                                                                                                                    |        |
| 5  | Data monitoring:                     | <a href="#">#21b</a>                                                                                                                                                                                                               | 13     |
| 6  | interim analysis                     | Description of any interim analyses and stopping guidelines, including who will have access to these interim results and make the final decision to terminate the trial                                                            |        |
| 7  |                                      |                                                                                                                                                                                                                                    |        |
| 8  |                                      |                                                                                                                                                                                                                                    |        |
| 9  |                                      |                                                                                                                                                                                                                                    |        |
| 10 |                                      |                                                                                                                                                                                                                                    |        |
| 11 |                                      |                                                                                                                                                                                                                                    |        |
| 12 | Harms                                | <a href="#">#22</a>                                                                                                                                                                                                                | 13     |
| 13 |                                      | Plans for collecting, assessing, reporting, and managing solicited and spontaneously reported adverse events and other unintended effects of trial interventions or trial conduct                                                  |        |
| 14 |                                      |                                                                                                                                                                                                                                    |        |
| 15 |                                      |                                                                                                                                                                                                                                    |        |
| 16 |                                      |                                                                                                                                                                                                                                    |        |
| 17 |                                      |                                                                                                                                                                                                                                    |        |
| 18 |                                      |                                                                                                                                                                                                                                    |        |
| 19 | Auditing                             | <a href="#">#23</a>                                                                                                                                                                                                                | NA     |
| 20 |                                      | Frequency and procedures for auditing trial conduct, if any, and whether the process will be independent from investigators and the sponsor                                                                                        |        |
| 21 |                                      |                                                                                                                                                                                                                                    |        |
| 22 |                                      |                                                                                                                                                                                                                                    |        |
| 23 |                                      |                                                                                                                                                                                                                                    |        |
| 24 | <b>Ethics and dissemination</b>      |                                                                                                                                                                                                                                    |        |
| 25 |                                      |                                                                                                                                                                                                                                    |        |
| 26 |                                      |                                                                                                                                                                                                                                    |        |
| 27 |                                      |                                                                                                                                                                                                                                    |        |
| 28 | Research ethics approval             | <a href="#">#24</a>                                                                                                                                                                                                                | 12     |
| 29 |                                      | Plans for seeking research ethics committee / institutional review board (REC / IRB) approval                                                                                                                                      |        |
| 30 |                                      |                                                                                                                                                                                                                                    |        |
| 31 |                                      |                                                                                                                                                                                                                                    |        |
| 32 | Protocol amendments                  | <a href="#">#25</a>                                                                                                                                                                                                                | 13     |
| 33 |                                      | Plans for communicating important protocol modifications (eg, changes to eligibility criteria, outcomes, analyses) to relevant parties (eg, investigators, REC / IRBs, trial participants, trial registries, journals, regulators) |        |
| 34 |                                      |                                                                                                                                                                                                                                    |        |
| 35 |                                      |                                                                                                                                                                                                                                    |        |
| 36 |                                      |                                                                                                                                                                                                                                    |        |
| 37 |                                      |                                                                                                                                                                                                                                    |        |
| 38 |                                      |                                                                                                                                                                                                                                    |        |
| 39 |                                      |                                                                                                                                                                                                                                    |        |
| 40 | Consent or assent                    | <a href="#">#26a</a>                                                                                                                                                                                                               | 11     |
| 41 |                                      | Who will obtain informed consent or assent from potential trial participants or authorised surrogates, and how (see Item 32)                                                                                                       |        |
| 42 |                                      |                                                                                                                                                                                                                                    |        |
| 43 |                                      |                                                                                                                                                                                                                                    |        |
| 44 |                                      |                                                                                                                                                                                                                                    |        |
| 45 |                                      |                                                                                                                                                                                                                                    |        |
| 46 | Consent or assent: ancillary studies | <a href="#">#26b</a>                                                                                                                                                                                                               | NA     |
| 47 |                                      | Additional consent provisions for collection and use of participant data and biological specimens in ancillary studies, if applicable                                                                                              |        |
| 48 |                                      |                                                                                                                                                                                                                                    |        |
| 49 |                                      |                                                                                                                                                                                                                                    |        |
| 50 |                                      |                                                                                                                                                                                                                                    |        |
| 51 | Confidentiality                      | <a href="#">#27</a>                                                                                                                                                                                                                | 12, 13 |
| 52 |                                      | How personal information about potential and enrolled participants will be collected, shared, and maintained in order to protect confidentiality before, during, and after the trial                                               |        |
| 53 |                                      |                                                                                                                                                                                                                                    |        |
| 54 |                                      |                                                                                                                                                                                                                                    |        |
| 55 |                                      |                                                                                                                                                                                                                                    |        |
| 56 |                                      |                                                                                                                                                                                                                                    |        |
| 57 |                                      |                                                                                                                                                                                                                                    |        |
| 58 |                                      |                                                                                                                                                                                                                                    |        |
| 59 |                                      |                                                                                                                                                                                                                                    |        |
| 60 |                                      |                                                                                                                                                                                                                                    |        |

|    |                       |                      |                                                        |               |
|----|-----------------------|----------------------|--------------------------------------------------------|---------------|
| 1  | Declaration of        | <a href="#">#28</a>  | Financial and other competing interests for            | 15            |
| 2  | interests             |                      | principal investigators for the overall trial and each |               |
| 3  |                       |                      | study site                                             |               |
| 4  |                       |                      |                                                        |               |
| 5  |                       |                      |                                                        |               |
| 6  | Data access           | <a href="#">#29</a>  | Statement of who will have access to the final trial   | 15            |
| 7  |                       |                      | dataset, and disclosure of contractual agreements      |               |
| 8  |                       |                      | that limit such access for investigators               |               |
| 9  |                       |                      |                                                        |               |
| 10 |                       |                      |                                                        |               |
| 11 | Ancillary and post    | <a href="#">#30</a>  | Provisions, if any, for ancillary and post-trial care, | NA            |
| 12 | trial care            |                      | and for compensation to those who suffer harm          |               |
| 13 |                       |                      | from trial participation                               |               |
| 14 |                       |                      |                                                        |               |
| 15 |                       |                      |                                                        |               |
| 16 |                       |                      |                                                        |               |
| 17 | Dissemination policy: | <a href="#">#31a</a> | Plans for investigators and sponsor to                 | 14            |
| 18 | trial results         |                      | communicate trial results to participants,             |               |
| 19 |                       |                      | healthcare professionals, the public, and other        |               |
| 20 |                       |                      | relevant groups (eg, via publication, reporting in     |               |
| 21 |                       |                      | results databases, or other data sharing               |               |
| 22 |                       |                      | arrangements), including any publication               |               |
| 23 |                       |                      | restrictions                                           |               |
| 24 |                       |                      |                                                        |               |
| 25 |                       |                      |                                                        |               |
| 26 |                       |                      |                                                        |               |
| 27 |                       |                      |                                                        |               |
| 28 | Dissemination policy: | <a href="#">#31b</a> | Authorship eligibility guidelines and any intended     | NA            |
| 29 | authorship            |                      | use of professional writers                            |               |
| 30 |                       |                      |                                                        |               |
| 31 |                       |                      |                                                        |               |
| 32 | Dissemination policy: | <a href="#">#31c</a> | Plans, if any, for granting public access to the full  | 15            |
| 33 | reproducible          |                      | protocol, participant-level dataset, and statistical   |               |
| 34 | research              |                      | code                                                   |               |
| 35 |                       |                      |                                                        |               |
| 36 |                       |                      |                                                        |               |
| 37 | <b>Appendices</b>     |                      |                                                        |               |
| 38 |                       |                      |                                                        |               |
| 39 |                       |                      |                                                        |               |
| 40 | Informed consent      | <a href="#">#32</a>  | Model consent form and other related                   | Supplementary |
| 41 | materials             |                      | documentation given to participants and                | information   |
| 42 |                       |                      | authorised surrogates                                  |               |
| 43 |                       |                      |                                                        |               |
| 44 |                       |                      |                                                        |               |
| 45 | Biological specimens  | <a href="#">#33</a>  | Plans for collection, laboratory evaluation, and       | NA            |
| 46 |                       |                      | storage of biological specimens for genetic or         |               |
| 47 |                       |                      | molecular analysis in the current trial and for        |               |
| 48 |                       |                      | future use in ancillary studies, if applicable         |               |
| 49 |                       |                      |                                                        |               |
| 50 |                       |                      |                                                        |               |
| 51 |                       |                      |                                                        |               |

The SPIRIT Explanation and Elaboration paper is distributed under the terms of the Creative Commons Attribution License CC-BY-NC. This checklist was completed on 19. October 2023 using <https://www.goodreports.org/>, a tool made by the [EQUATOR Network](#) in collaboration with [Penelope.ai](#)

# BMJ Open

## Bronchoscopy with and without needle-based confocal laser endomicroscopy for peripheral lung nodule diagnosis: protocol for a multicenter randomized controlled trial (CLEVER trial)

|                               |                                                                                                                                                                                                                                                                                                                                                                                                                                                                                                                                                                                                                                                                                                                                                                                                                                                                                                                                                                                                                                                                                                                                                                                                                                                                                                                                                                                                                                                                                                                                                                                                                                                                                                                                                                                                                                                                                                                                                                                                                                                                                                                                                                                                                                                                           |
|-------------------------------|---------------------------------------------------------------------------------------------------------------------------------------------------------------------------------------------------------------------------------------------------------------------------------------------------------------------------------------------------------------------------------------------------------------------------------------------------------------------------------------------------------------------------------------------------------------------------------------------------------------------------------------------------------------------------------------------------------------------------------------------------------------------------------------------------------------------------------------------------------------------------------------------------------------------------------------------------------------------------------------------------------------------------------------------------------------------------------------------------------------------------------------------------------------------------------------------------------------------------------------------------------------------------------------------------------------------------------------------------------------------------------------------------------------------------------------------------------------------------------------------------------------------------------------------------------------------------------------------------------------------------------------------------------------------------------------------------------------------------------------------------------------------------------------------------------------------------------------------------------------------------------------------------------------------------------------------------------------------------------------------------------------------------------------------------------------------------------------------------------------------------------------------------------------------------------------------------------------------------------------------------------------------------|
| Journal:                      | <i>BMJ Open</i>                                                                                                                                                                                                                                                                                                                                                                                                                                                                                                                                                                                                                                                                                                                                                                                                                                                                                                                                                                                                                                                                                                                                                                                                                                                                                                                                                                                                                                                                                                                                                                                                                                                                                                                                                                                                                                                                                                                                                                                                                                                                                                                                                                                                                                                           |
| Manuscript ID                 | bmjopen-2023-081148.R3                                                                                                                                                                                                                                                                                                                                                                                                                                                                                                                                                                                                                                                                                                                                                                                                                                                                                                                                                                                                                                                                                                                                                                                                                                                                                                                                                                                                                                                                                                                                                                                                                                                                                                                                                                                                                                                                                                                                                                                                                                                                                                                                                                                                                                                    |
| Article Type:                 | Protocol                                                                                                                                                                                                                                                                                                                                                                                                                                                                                                                                                                                                                                                                                                                                                                                                                                                                                                                                                                                                                                                                                                                                                                                                                                                                                                                                                                                                                                                                                                                                                                                                                                                                                                                                                                                                                                                                                                                                                                                                                                                                                                                                                                                                                                                                  |
| Date Submitted by the Author: | 17-Apr-2024                                                                                                                                                                                                                                                                                                                                                                                                                                                                                                                                                                                                                                                                                                                                                                                                                                                                                                                                                                                                                                                                                                                                                                                                                                                                                                                                                                                                                                                                                                                                                                                                                                                                                                                                                                                                                                                                                                                                                                                                                                                                                                                                                                                                                                                               |
| Complete List of Authors:     | <p>van Heumen, Saskia; Amsterdam Universitair Medische Centra, Department of Respiratory Medicine</p> <p>Kramer, Tess; Amsterdam Universitair Medische Centra, Department of Respiratory Medicine</p> <p>Korevaar, Daniël; Amsterdam Universitair Medische Centra, Department of Respiratory Medicine</p> <p>Gompelmann, Daniela; Medical University of Vienna, Department of Internal Medicine II, Division of Pulmonology</p> <p>Bal, Christina; Medical University of Vienna, Department of Internal Medicine II, Division of Pulmonology</p> <p>Hetzel, Juergen; University Hospital Basel, Department of Pneumology</p> <p>Jahn, Kathleen; University Hospital Basel, Department of Pneumology</p> <p>Poletti, V; Morgagni-Pierantoni Hospital, Department of Thoracic Diseases</p> <p>Ravaglia, Claudia; Morgagni-Pierantoni Hospital, Department of Thoracic Diseases, G.B. Morgagni Hospital and University of Bologna, Forlì, Italy</p> <p>Sadoughi, Ali; Montefiore Medical Center Einstein Campus, Department of Pulmonary Medicine</p> <p>Stratakos, Grigoris; National and Kapodistrian University of Athens, 1st Respiratory Medicine Department of the National Kapodistrian University of Athens</p> <p>Bakiri, Katerina; National and Kapodistrian University of Athens, 1st Respiratory Medicine Department</p> <p>Koukaki, Evangelia; National and Kapodistrian University of Athens, 1st Respiratory Medicine Department of the National Kapodistrian University of Athens</p> <p>Anagnostopoulos, Nektarios; National and Kapodistrian University of Athens, 1st Respiratory Medicine Department of the National Kapodistrian University of Athens</p> <p>Votruba, Jiří; General University Hospital in Prague, 1st Department of Tuberculosis and Respiratory Diseases, First Faculty of Medicine</p> <p>Šestáková, Zuzana; General University Hospital in Prague, 1st Department of Tuberculosis and Respiratory Diseases, First Faculty of Medicine</p> <p>Heuvelmans, Marjolein; Amsterdam Universitair Medische Centra, Department of Respiratory Medicine</p> <p>Daniels, Johannes; Amsterdam Universitair Medische Centra, Department of Respiratory Medicine</p> <p>de Bruin, Daniel; Amsterdam Universitair Medische Centra, Department</p> |



1  
2  
3  
4  
5  
6  
7  
8  
9  
10  
11  
12  
13  
14  
15  
16  
17  
18  
19  
20  
21  
22  
23  
24  
25  
26  
27  
28  
29  
30  
31  
32  
33  
34  
35  
36  
37  
38  
39  
40  
41  
42  
43  
44  
45  
46  
47  
48  
49  
50  
51  
52  
53  
54  
55  
56  
57  
58  
59  
60

|                                   |                                                                                                                                                                                                                                                                                 |
|-----------------------------------|---------------------------------------------------------------------------------------------------------------------------------------------------------------------------------------------------------------------------------------------------------------------------------|
|                                   | of Biomedical Engineering and Physics; Cancer Centre Amsterdam, Imaging and Biomarkers<br>Bonta, Peter; Amsterdam Universitair Medische Centra, Department of Respiratory Medicine<br>Annema, Jouke; Amsterdam Universitair Medische Centra, Department of Respiratory Medicine |
| <b>Primary Subject Heading:</b>   | Respiratory medicine                                                                                                                                                                                                                                                            |
| <b>Secondary Subject Heading:</b> | Oncology, Pathology, Diagnostics                                                                                                                                                                                                                                                |
| <b>Keywords:</b>                  | Biopsy, Clinical Trial, Diagnostic Imaging, Respiratory tract tumours < ONCOLOGY, Cytopathology < PATHOLOGY                                                                                                                                                                     |
|                                   |                                                                                                                                                                                                                                                                                 |

SCHOLARONE™  
Manuscripts

# Bronchoscopy with and without needle-based confocal laser endomicroscopy for peripheral lung nodule diagnosis: protocol for a multicenter randomized controlled trial (CLEVER trial)

S. van Heumen<sup>1</sup>, T. Kramer<sup>1</sup>, D.A. Korevaar<sup>1</sup>, D. Gompelmann<sup>2</sup>, C. Bal<sup>2</sup>, J. Hetzel<sup>3</sup>, K. Jahn<sup>3</sup>, V. Poletti<sup>4</sup>, C. Ravaglia<sup>4</sup>, A. Sadoughi<sup>5</sup>, G. Stratakos<sup>6</sup>, K. Bakiri<sup>6</sup>, E. Koukaki<sup>6</sup>, N. Anagnostopoulos<sup>6</sup>, J. Votruba<sup>7</sup>, Z. Šestáková<sup>7</sup>, M.A. Heuvelmans<sup>1</sup>, J.M.A. Daniels<sup>1</sup>, D.M. de Bruin<sup>8,9</sup>, P.I. Bonta<sup>1</sup>, J.T. Annema<sup>1\*</sup>

\*Corresponding author: Prof. dr. J.T. Annema, [j.t.annema@amsterdamumc.nl](mailto:j.t.annema@amsterdamumc.nl)

<sup>1</sup> Department of Respiratory Medicine, Amsterdam University Medical Centers, Amsterdam, The Netherlands

<sup>2</sup> Department of Internal Medicine II, Division of Pulmonology, Medical University of Vienna, Vienna, Austria

<sup>3</sup> Department of Pneumology, University Hospital Basel, Basel, Switzerland

<sup>4</sup> Department of Thoracic Diseases, G.B. Morgagni Hospital and University of Bologna, Forlì, Italy

<sup>5</sup> Department of Pulmonary Medicine, Montefiore Medical Center/Albert Einstein College of Medicine, Bronx, NY, USA.

<sup>6</sup> 1st Respiratory Medicine Department of the National, Kapodistrian University of Athens, Athens, Greece

<sup>7</sup> 1st Department of Tuberculosis and Respiratory Diseases, First Faculty of Medicine, Charles University and General University Hospital in Prague, Prague, Czech Republic

<sup>8</sup> Department of Biomedical Engineering and Physics, Amsterdam University Medical Centers, Amsterdam

<sup>9</sup> Cancer Center Amsterdam, Imaging and Biomarkers, Amsterdam, The Netherlands

## Abstract

**Introduction:** Despite many technological advances, the diagnostic yield of bronchoscopic peripheral lung nodule analysis remains limited due to frequent mispositioning. Needle-based confocal laser endomicroscopy (nCLE) enables real-time microscopic feedback on needle positioning, potentially improving the sampling location and diagnostic yield. Previous studies have defined and validated nCLE criteria for malignancy, airway, and lung parenchyma. Larger studies demonstrating the effect of nCLE on diagnostic yield are lacking. We aim to investigate if nCLE-imaging integrated with

1  
2  
3 conventional bronchoscopy results in a higher diagnostic yield compared to conventional  
4 bronchoscopy without nCLE.

5  
6 **Methods and analysis:** This is a parallel-group randomized controlled trial. Recruitment is performed  
7  
8 at pulmonology outpatient clinics in university and general hospitals in six different European  
9  
10 countries and one hospital in the United States. Consecutive patients with a for malignancy suspected  
11  
12 peripheral lung nodule (10-30 mm) with an indication for diagnostic bronchoscopy will be screened,  
13  
14 and 208 patients will be included. Web-based randomization (1:1) between the two procedures will  
15  
16 be performed. The primary outcome is diagnostic yield. Secondary outcomes include diagnostic  
17  
18 sensitivity for malignancy, needle repositionings, procedure and fluoroscopy duration, and  
19  
20 complications. Pathologists will be blinded to procedure type; patients and endoscopists will not.

21  
22 **Ethics and dissemination:** Primary approval by the Ethics Committee of the Amsterdam University  
23  
24 Medical Center. Dissemination involves publication in a peer-reviewed journal.

25  
26 **Support:** Financial and material support from Mauna Kea Technologies.

27  
28 **Trial registration:** ClinicalTrials.gov NCT06079970.

29  
30 **Keywords:** Respiratory tract neoplasms, bronchoscopy, confocal laser scanning microscopy, nCLE,  
31  
32 rapid-on-site evaluation (ROSE), histology/cytology, lung cancer, peripheral lung nodule

33  
34 **Manuscript word count:** 4187

## 35 36 37 Article summary

### 38 39 40 Strengths and limitations

- 41  
42 • This is a (international multicenter) randomized controlled trial evaluating a novel sampling  
43  
44 technique needle-based confocal laser endomicroscopy (nCLE) with the current standard for  
45  
46 bronchoscopic diagnosis of peripheral lung nodules.
- 47  
48 • The definition of diagnostic yield is under debate. In this study, the diagnostic yield will be  
49  
50 reported based on two different definitions for better comparison with existing and future  
51  
52 studies.
- 53  
54 • Each participating center uses their own methods for conventional bronchoscopic diagnosis of  
55  
56 peripheral lung nodules and will therefore not be completely uniform across all centers. Each  
57  
58 center will keep conventional methods uniform in both the control and intervention group to  
59  
60 ensure differences can be attributed to the nCLE technique.
- In this study only peripheral pulmonary nodules between 1 – 3 cm are included.

1  
2  
3  
4  
5  
6  
7  
8  
9  
10  
11  
12  
13  
14  
15  
16  
17  
18  
19  
20  
21  
22  
23  
24  
25  
26  
27  
28  
29  
30  
31  
32  
33  
34  
35  
36  
37  
38  
39  
40  
41  
42  
43  
44  
45  
46  
47  
48  
49  
50  
51  
52  
53  
54  
55  
56  
57  
58  
59  
60

For peer review only

## Introduction

Lung cancer remains the leading cause of cancer-related deaths, with 2.09 million new diagnoses and 1.76 million deaths worldwide per year.(1, 2) The increased use of chest computed tomography (CT) and the future implementation of low-dose CT lung cancer screening result in an increased detection of lung nodules.(3, 4) Consequently, more early-stage lung cancer is detected, which is most often located in the periphery of the lung.(5, 6) Depending on lesion characteristics and associated risk factors, tissue sampling is needed to establish a definitive diagnosis and determine the appropriate treatment.

Bronchoscopic analysis of peripheral lung nodules remains challenging despite many technological innovations. The procedure comprises three essential pillars needed for a diagnostic success: navigation to the lesion, confirmation of tool location within the lesion (i.e., tool-in-lesion confirmation) and successful tissue sampling. In the past years, fluoroscopy, radial probe endobronchial ultrasound (r-EBUS), electromagnetic navigation (EMN), virtual bronchoscopy (VB) or cone beam computed tomography (CBCT) combined with augmented fluoroscopy have improved navigation with or without tool-in-lesion confirmation.(7) Additionally, rapid on-site evaluation (ROSE) is sometimes used for direct feedback on representativeness of the sample and forming a preliminary diagnosis. Nevertheless, diagnostic yield rarely exceeds 71%,(8) as it depends highly on factors such as nodule size, bronchus sign on pre-procedural CT, eccentric vs. concentric r-EBUS pattern, pre-test probability of malignancy and sampling tools used.(9-12) The arrival of robotic bronchoscopy platforms combined with existing techniques have shown promising results with high navigation success rates. However, diagnostic yield remains behind due to substantial mispositioning rates, retaining a large gap between navigation success and diagnostic yield.(13-15) The persistently low diagnostic yield calls for complementary techniques providing real-time information for fine-tuning the needle position.

Confocal laser endomicroscopy (CLE) is a high-resolution microscopic technique that visualizes individual cells in real-time. It has proven useful in the gastroenterology field, where it has been demonstrated that CLE could be used for rapid diagnosis, targeting of biopsies, and prediction of neoplasms.(16) CLE has been recently introduced in the respiratory tract, including for the peripheral lung nodule analysis.(17-19) CLE probes are thin enough to fit through 18G biopsy needles to provide microscopic feedback at the tip of the needle (needle-based CLE (nCLE)). Fluorescein dye is used as a contrast agent and binds to the extracellular matrix, resulting in a highly fluorescent background in which individual cells can be seen. Previous studies have identified three nCLE image characteristics

1  
2  
3 for malignancy in the lung,(19) and criteria for airway and lung parenchyma.(18) The identification of  
4 malignancy and distinction from airway and lung parenchyma were accurate based on these  
5 criteria.(18, 19)  
6  
7

8 A recent study demonstrated a high needle mispositioning rate, as nCLE-imaging resulted in a  
9 repositioning of the biopsy needle in 9 out of 20 patients.(20) nCLE could therefore potentially bridge  
10 the gap between navigation success and diagnostic yield.  
11  
12  
13

14  
15 To date, larger studies investigating the effect of the addition of nCLE to bronchoscopic peripheral  
16 lung nodule analysis are lacking. The improved diagnostic yield could reduce the necessity further or  
17 more invasive diagnostic interventions such as CT-guided transthoracic biopsies or diagnostic surgery.  
18 In this multicenter randomized controlled trial, we aim to investigate if nCLE-imaging integrated with  
19 conventional bronchoscopy results in a higher diagnostic yield compared to conventional  
20 bronchoscopy without nCLE in diagnosing peripheral lung nodules.  
21  
22  
23  
24  
25

## 26 **Methods and analysis**

### 27 **Study design**

28  
29 This study is an investigator-initiated, international, multicenter, parallel-group randomized  
30 controlled trial comparing two bronchoscopy procedures (with or without nCLE) for the diagnosis of  
31 suspected peripheral lung nodules. The study flowchart is shown in Figure 1.  
32  
33  
34  
35  
36  
37  
38

### 39 **Participating centers**

40  
41 The study is executed in university or general hospitals in six countries in Europe and one hospital in  
42 the United States. Study inclusion started on 18 October 2023. Other centers will start including in  
43 2024 and the estimated duration of the study is 24 months including follow up.  
44  
45  
46  
47

### 48 **Randomization**

49  
50 After the participant has given written informed consent, patient data is entered into a digital  
51 database (CASTOR Electronic Data Capture (EDC) electronic case report form (eCRF)). We will use a  
52 web-based block-randomization module in Castor to randomize participants into the control and  
53 interventional group (1:1). Randomization will be stratified by participating center to ensure that the  
54 nCLE and non-nCLE group is of the same size in each center. As nodule size has significant impact on  
55  
56  
57  
58  
59  
60

1  
2  
3 diagnostic yield,(8) we will stratify for nodule size ( $\leq 20$  mm and  $>20$  mm) to ensure that size is evenly  
4 distributed across study arms.  
5  
6  
7

8 Patients and endoscopists will not be blinded since the physician needs to know if nCLE images must  
9 be acquired during bronchoscopy. Pathologists will be blinded to procedure type and raters who will  
10 analyze the nCLE videos after the procedure will be blinded to the patient history and  
11 histopathological outcome of the tissue samples.  
12  
13  
14

## 15 16 17 **Study population**

18  
19 Consecutive patients will be recruited by their treating physician at pulmonology outpatient clinics of  
20 participating centers. Patients are eligible for inclusion if they meet the following inclusion criteria:  
21  
22

- 23 1.  $\geq 18$  years of age
- 24 2. Suspected malignant peripheral lung lesion with an indication for a bronchoscopic diagnostic  
25 work-up as determined by the attending physician or tumor board. Peripheral pulmonary  
26 lesions are defined as lesions located beyond the visible segmental bronchi, not detectable by  
27 regular flexible bronchoscopy
- 28 3. Bronchus sign on pre-procedural CT or estimated confidence for successful navigation to the  
29 nodule resulting in a r-EBUS signal
- 30 4. Solid part of the lesion must be  $\geq 10$  mm
- 31 5. Largest dimension of lesion size on CT  $\leq 30$  mm (long-axis)
- 32 6. Ability to understand and willingness to sign a written informed consent

33  
34  
35  
36  
37  
38  
39  
40  
41 A potential subject who meets any of the following criteria will be excluded from participation in this  
42 study:  
43

- 44 1. Inability or non-willingness to provide informed consent
- 45 2. Endobronchial visible malignancy on bronchoscopic inspection
- 46 3. Target lesion within reach of the linear EBUS scope
- 47 4. Failure to comply with the study protocol
- 48 5. Known allergy or risk factors for an allergic reaction to fluorescein
- 49 6. Pregnancy or breastfeeding
- 50 7. Hemodynamic instability
- 51 8. Refractory hypoxemia
- 52 9. Therapeutic anticoagulant use that cannot be withheld for an appropriate interval before the  
53 procedure  
54  
55  
56  
57  
58  
59  
60

10. Unable to tolerate general anesthesia according to the anesthesiologist
11. Undergoing chemotherapy as several chemotherapies have fluorescent properties at the same wavelength (e.g., doxorubicin)

### Primary outcome measure

Diagnostic yield (defined as the proportion of patients in whom the bronchoscopic procedure results in a definitive diagnosis [either malignant, specific benign or non-specific benign confirmed as benign in follow-up], relative to the total number of patients that underwent the diagnostic bronchoscopic procedure). If patients with multiple lesions are included, the diagnostic yield will be computed per nodule.

### Secondary outcome measures

1. Diagnostic sensitivity for malignancy (defined as the proportion of patients in whom the bronchoscopic procedure diagnoses malignancy relative to the total number of patients with a final diagnosis of malignancy as determined by the reference standard).
2. Diagnostic yield according to the strict definition by Vachani et al.(21) (defined as the proportion of patients in whom the bronchoscopic procedure results in a definitive diagnosis [either malignant or specific benign diagnosis], relative to the total number of patients that underwent the diagnostic bronchoscopic procedure).
3. Procedure duration (from bronchoscope insertion until removal).
4. Percentage of patients in which the needle was fine-tuned (defined as moving the needle within the same distal airway) or repositioned (defined as the selection of a different distal airway for tissue sampling) based on nCLE feedback (defined as the number of patients the needle was fine-tuned/repositioned divided by the total number of patients in which nCLE imaging was used).
5. Fluoroscopy radiation time and dose.
6. Diagnostic yield of ROSE (defined as the proportion of patients in whom ROSE resulted in a classifying diagnosis [malignant or specific benign diagnosis], relative to the total number of patients).
7. Proportion of patients in which ROSE provided tool-in-lesion confirmation, meaning that the acquired tissue shows signs of a malignant or non-malignant diagnosis and was not related to airway/lung parenchyma sampling such as bronchus epithelium/blood contamination, and tissue not suitable for a specific diagnosis such as atypical cells.



- 1
  - 2
  - 3
  - 4
  - 5
  - 6
  - 7
  - 8
  - 9
  - 10
  - 11
  - 12
  - 13
  - 14
  - 15
  - 16
  - 17
  - 18
  - 19
  - 20
  - 21
  - 22
  - 23
  - 24
  - 25
  - 26
  - 27
  - 28
  - 29
  - 30
  - 31
  - 32
  - 33
  - 34
  - 35
  - 36
  - 37
  - 38
  - 39
  - 40
  - 41
  - 42
  - 43
  - 44
  - 45
  - 46
  - 47
  - 48
  - 49
  - 50
  - 51
  - 52
  - 53
  - 54
  - 55
  - 56
  - 57
  - 58
  - 59
  - 60
8. Complication rate (defined as any complication or complication categories occurring during or directly after the bronchoscopic procedure or any procedure-related complication within one week after the procedure).
9. Requirement of additional diagnostic procedures (CT-guided transthoracic biopsies, surgical diagnostics and/or additional bronchoscopy) during the 6-month follow-up period.

### Exploratory endpoints

As an exploratory endpoint, we aim to identify potential new nCLE image characteristics for malignant and benign pathologies. We will also create an algorithm for automated nCLE criteria recognition using machine- or deep-learning methods.

### Outcome parameters

Table 1 shows the baseline patient characteristics and corresponding procedural information that will be collected at the time of study inclusion, during the procedure and 6-month follow-up period.

### Investigational product

The Cellvizio® confocal laser endomicroscopy system with the corresponding AQ-Flex™ 19 miniprobe (Mauna Kea technologies (MKT), Paris, France) is the investigational medical device of this study. The probe has a compatible operating diameter of 0.91 mm, a resolution of 3,5 µm, a penetration depth of 40 to 50 µm and a maximum field of view of 325 µm. The device and corresponding probes are CE-marked and will be used within the intended purpose.(22)

The technique uses a laser beam (488 nm) focused by an objective lens to illuminate the tissue, with the illumination focus at a pre-defined depth. The light strikes the tissue resulting in fluorescent light emission back from autofluorescent structures such as elastin in the airways or an exogenous fluorescent dye such as fluorescein, a contrast dye used for nCLE imaging in the lung. Light originating from the focal layer will be focused by the objective lens at the opening of a pinhole and detected, while light from out-of-focus layers is rejected by the pinhole. This results in high-resolution imaging of individual cells and structures at a specific point with limited influence of (scattered) light from out-of-focus areas.(22)

Table 1: Data to be collected

|                                                                                                                                                                                                                                    |
|------------------------------------------------------------------------------------------------------------------------------------------------------------------------------------------------------------------------------------|
| <b>Patient characteristics</b>                                                                                                                                                                                                     |
| Age                                                                                                                                                                                                                                |
| Sex                                                                                                                                                                                                                                |
| BMI                                                                                                                                                                                                                                |
| Smoking history                                                                                                                                                                                                                    |
| Patient cancer history                                                                                                                                                                                                             |
| Family history of lung cancer                                                                                                                                                                                                      |
| <b>Pre-procedural (PET)CT scan lesion characteristics</b>                                                                                                                                                                          |
| CT scan quality (slice thickness)                                                                                                                                                                                                  |
| Size (largest diameter)                                                                                                                                                                                                            |
| Localization (segmental level)                                                                                                                                                                                                     |
| Lesion appearance/nodule type (Solid, non-solid/ground glass, partially solid)                                                                                                                                                     |
| Bronchus sign (present(concentric/eccentric )/absent/insufficient CT scan quality)                                                                                                                                                 |
| Spiculation sign (present/absent)                                                                                                                                                                                                  |
| Emphysema (present/absent)                                                                                                                                                                                                         |
| PET uptake (not performed/no uptake/faint ( $SUV < 1$ )/moderate ( $SUV 1 - 2.5$ ) /intense ( $SUV > 2.5$ ))                                                                                                                       |
| <b>Intra-procedural information</b>                                                                                                                                                                                                |
| r-EBUS sign (eccentric, concentric, absent)                                                                                                                                                                                        |
| Location of tissue sampling (lung segment)                                                                                                                                                                                         |
| nCLE image observations (for every needle pass)                                                                                                                                                                                    |
| Needle fine-tuning & repositioning done (for every needle pass)                                                                                                                                                                    |
| Sampling techniques used (TBNA, (cryo)biopsy, brush)                                                                                                                                                                               |
| ROSE results of tissue sample (if available)                                                                                                                                                                                       |
| Bronchoscopy start and end time                                                                                                                                                                                                    |
| Fluoroscopy duration                                                                                                                                                                                                               |
| Additional procedures performed (e.g., EBUS/EUS-B/etc.)                                                                                                                                                                            |
| (Serious) complications                                                                                                                                                                                                            |
| <b>Post-procedural information</b>                                                                                                                                                                                                 |
| (Serious) complications (up to 1 week after the procedure)                                                                                                                                                                         |
| Final pathological diagnosis (cytology and/or histology)                                                                                                                                                                           |
| (Additional) Diagnostic follow-up procedures needed (e.g., transthoracic needle biopsies, surgery, additional bronchoscopy, follow-up imaging) including (altered) diagnosis and/or results of follow-up CT-scans of the lesion(s) |

*RUL: right upper lobe; RML: right middle lobe; RLL; right lower lobe; LUP: left upper lobe; LLL: left lower lobe; CT: computed tomography; ROSE: rapid on-site evaluation; r-EBUS: radial endobronchial ultrasound; TBNA: transbronchial needle aspiration; SUV: standard uptake value*

## Study procedures

### Conventional diagnostic bronchoscopy (control group & intervention group)

The following procedure will be performed routinely (regardless of study participation): Bronchoscopic procedures will be performed by experienced pulmonologists specifically trained in navigational bronchoscopy and nCLE-imaging. All procedures are performed according to institutional practice, usually on an outpatient basis. Patient preparation and sedation will be done according to institutional practice and might include propofol or midazolam sedation and the use of topical anesthesia. Vital parameters will be monitored during and after the procedure.

Systematic bronchoscopic inspection of the airways will be performed, followed by r-EBUS imaging (guide sheath optional) to select the distal airway with the highest probability of reaching the lesion. The use of fluoroscopy, EMN, VB or ultrathin bronchoscope is optional if regularly used at that institution. CBCT navigation with or without augmented fluoroscopy and robotic bronchoscopy will not be used in patients included in this trial. Bronchoscopist may use these techniques after following all actions related to this protocol while ensuring tissue samples are processed separately. Transbronchial needle aspirations (TBNA) using the 18G FleXNeedle® (Broncus Medical Inc., San Jose, United States of America) and (cryo)biopsies will be performed to acquire tissue for pathological evaluation (a recommended minimum of 3 TBNA and 3 biopsies). During the bronchoscopic work up, some of the cytological aspirations will be evaluated on site (Rapid onsite evaluation, ROSE) and the representativeness of the samples will be reported to the bronchoscopist. ROSE will always be performed for the first TBNA pass. For the following passes, the bronchoscopist decides if it is indicated.

### Addition of nCLE imaging (intervention group)

The same procedure will be performed as described above for the patients randomized to the intervention arm, except for the addition of fluorescein administration and nCLE imaging before TBNA. Prior to the procedure, an 18G needle is preloaded with the CLE probe (AQ-Flex™ 19 Miniprobe, Mauna Kea Technologies, Paris, France). The CLE probe is advanced through the needle until the probe is positioned approximately 4 mm past the needle tip and secured using a locking device to maintain the probe position relative to the needle tip.

1  
2  
3 After determining the sample location based on r-EBUS and/or fluoroscopy, fluorescein (2.5 mL of 10%  
4 fluoresceindinatrium solution) is administered intravenously. Then, the preloaded 18G needle  
5 punctures the target area, followed by the insertion of the CLE probe through the biopsy needle for  
6 real-time microscopic feedback. In case nCLE visualizes airway or lung parenchyma, indicating a near-  
7 miss, the biopsy needle is fine-tuned (i.e., the needle is moved within the same distal airway) or  
8 repositioned (i.e., a different distal airway is chosen). If nCLE demonstrates that the biopsy needle is  
9 placed within the lesion, the CLE probe is removed from the biopsy needle while holding the needle  
10 in position, followed by tissue sampling at the same location (repeated for at least 3 TBNAs). A  
11 flowchart of the procedure steps for both the conventional bronchoscopy and the nCLE-guided  
12 bronchoscopy is shown in Figure 2.

### 21 **nCLE image interpretation**

22  
23 The airway and lung parenchyma nCLE criteria as described by Kramer et al.(18) will be considered as  
24 “out-of-lesion” criteria indicating mispositioning of the needle. Currently known criteria for “tool-in-  
25 lesion” are malignancy criteria and granuloma criteria.(18, 19, 23) nCLE images will be interpreted  
26 during the procedure by the performing bronchoscopist and their team. Additionally, all videos are  
27 rated post-procedure by blinded raters of the initiating center to establish a ground truth  
28 interpretation of the images.

### 35 **Pathological examination**

36  
37 The cytological and histological examination will be done according to standard hospital procedure. In  
38 case the bronchoscopic procedure is considered non-diagnostic, additional procedures (transthoracic  
39 needle aspiration, surgical procedure, etc.) could follow to obtain a definite diagnosis. Results of the  
40 nCLE imaging do not influence the indication for additional diagnostic procedures. If a surgical  
41 procedure is indicated, the histological images will be collected to compare this with the nCLE imaging.

42  
43 In this study, the final pathological diagnosis will be subdivided into four categories as described by  
44 Vachani et al.,(21) namely [1] malignant, [2] non-malignant, which is divided into specific benign  
45 (including granulomatous, infectious and lymphocyte-predominant patterns) or nonspecific benign  
46 (e.g. inflammation), and [3] non-diagnostic (i.e., insufficient material for classifying diagnosis or in case  
47 atypical cells could not be classified further).

### 57 **Reference standard**

1  
2  
3 For the primary outcome, diagnostic yield will be calculated using the intermediate method described  
4 by Vachani et al.(21) The abovementioned final pathological diagnosis categories will be used  
5 regardless of the results of the reference standard, except for initial non-specific benign diagnoses. In  
6 these cases, results from the reference standard will be considered. If the initial benign diagnosis is  
7 confirmed benign in follow-up, the bronchoscopic procedure will be considered diagnostic.  
8

9  
10 For the calculation of diagnostic sensitivity, malignant cases identified by the procedures under  
11 investigation will be considered as true positive since false positive results (almost) never occur.  
12 Benign (either specific or non-specific) and non-diagnostic samples will undergo a reference standard,  
13 which can be a subsequent sampling method such as transthoracic needle biopsy or surgery.  
14 Alternatively, if no subsequent sampling method is performed, clinical and radiological follow-up at 6  
15 months is considered the reference standard. If follow-up CT imaging shows regression or resolution  
16 of the nodule or in case a nodule remains stable, it will be considered as a confirmation of non-  
17 malignant diagnosis (i.e., true negative). Cases that are benign (either specific or non-specific) or non-  
18 diagnostic at the index bronchoscopy will be considered false negative if a malignancy diagnosis is  
19 established by the reference standard or if therapeutic procedures are done without confirmation of  
20 diagnosis. Figure 3 gives a schematic overview of the calculation methods of diagnostic yield and  
21 sensitivity for malignancy.  
22  
23  
24  
25  
26  
27  
28  
29  
30  
31  
32

### 33 **Informed consent procedure**

34  
35 Patients will be recruited by their treating physician. If the patient is willing to receive more  
36 information about study participation, information will be provided by the local investigator. The  
37 eligible participants will have sufficient time to consider their consent. Written informed consent must  
38 be provided before any study-related procedures take place. The English template of the informed  
39 consent is provided as a supplementary file. After informed consent, patients will be randomized using  
40 Castor EDC software and assigned to the control or intervention group. The bronchoscopy will then  
41 be performed according to the study protocol. In case patients decline participation in the study, they  
42 will be treated to the usual local clinical practices and guidelines.  
43  
44  
45  
46  
47  
48  
49

### 50 **Quality assurance**

51  
52 Only experienced pulmonologists will perform the procedures to ensure high-quality bronchoscopic  
53 procedures. Additionally, all participating centers will be trained in the use of the CLE Cellvizio device  
54 and to maintain homogeneous quality of the nCLE image acquisition and interpretation over all  
55 centers. Training entails theoretic and practical training by the initiating center with extensive nCLE  
56 experience and MKT representatives.  
57  
58  
59  
60

## Sample size justification

Based on previous studies and meta-analyses, we expect the diagnostic yield in patients with a lesion <30 mm in the conventional bronchoscopy arm to be 62%.<sup>(24, 25)</sup> We hypothesize that additional nCLE guidance in the intervention arm will result in a diagnostic yield of 80%. In total, 198 patients are needed to show that nCLE guidance results in a diagnostic yield that is 18 percent point higher than the conventional bronchoscopy arm ( $\alpha=0.05$  and  $\text{power}=0.80$ ). Taking into account a 5% study drop-out, a total of 208 patients will be included. We believe an increase in the diagnostic yield (from 62% to 80%) demonstrates a clinically relevant improvement in lung cancer diagnosis.

## Data analysis

Results for continuous variables will be expressed as means and standard deviations or medians with interquartile ranges. Categorical variables will be expressed as frequencies and percentages. The Chi-squared test will be used to compare diagnostic yield (or other comparisons between categorical variables) between the two randomization groups. Continuous variables will be compared using Student's t-test, or Mann-Whitney-U tests. A two-tailed P-value <0.05 will be considered statistically significant. All analyses are done based on an intention-to-treat approach, meaning that patients are analyzed as part of the intervention group they were assigned to, even if nCLE imaging was not executed in a patient in the intervention arm due to unforeseen circumstances. These specific cases will be reported in the manuscript. Patients not undergoing the planned bronchoscopy procedure after randomization are excluded from the analysis. Patients with missing outcome data will be excluded from analysis. Patients with incomplete essential follow-up information will also be excluded from the calculation of diagnostic sensitivity. However, we will also calculate diagnostic sensitivity based on a 'worst-case scenario', in which these patients are considered false negatives. For the primary outcome, subgroup analysis will be performed for several lesions and procedural characteristics (lesion size ( $\leq 20$  mm vs  $>20$  mm), radial EBUS image (eccentric vs concentric vs absent), location (upper lobe (without lingual) vs middle lobe/lingual vs lower lobe), pre-test probability that the nodule is cancerous (<10%, 10 – 35%, 36-70% and >70%) based on the Brock score.<sup>(26)</sup>

## Protocol amendments

Substantive protocol amendments will be assessed by the METC Amsterdam UMC. A substantial amendment is already incorporated in this publication. In the course of subject screening, it was observed that certain patients, integral to the population that could potentially benefit from nCLE,

1  
2  
3 were excluded. Initially presence of a positive bronchus sign was obligatory. After inclusion of 12  
4 patients, we also include patients if the bronchoscopist has estimated confidence for successful  
5 navigation to the nodule resulting in a r-EBUS signal without a clear bronchus sign on chest CT. As only  
6 5% of patients were included at a single center at the moment of the change, effects on the outcomes  
7 are negligible. In the event of other substantial amendments, all changes with a rationale will be  
8 reported in future publications arising from this protocol.  
9  
10  
11  
12  
13  
14

### 15 **Patient and Public Involvement statement**

16  
17 There was no patients or public involvement in the design of this study. An original research  
18 manuscript will be prepared to present the study results.  
19  
20  
21

### 22 **Ethics and dissemination**

23  
24 The CLEVER study will be conducted in accordance with the Declaration of Helsinki (64th WMA  
25 General Assembly, Fortaleza, Brazil, October 2013) and the Medical Research Involving Human  
26 Subjects Act (WMO, The Netherlands) principles. To date, the Medical Ethical Committee of the  
27 Amsterdam UMC (NL83257.018.22), Athens Chest Hospital (21583/25-08-23) and General University  
28 Hospital in Prague (č.j. 143/23 S) have approved the study. All participating sites will obtain local  
29 ethical approval prior to starting inclusions. Written informed consent will be obtained prior to  
30 randomization and any study-related procedures. In case of major changes to the protocol, the ethical  
31 review board will be notified, and it will be communicated with all participating centers and registered  
32 on clinicaltrials.gov.  
33  
34  
35  
36  
37  
38  
39  
40  
41  
42

### 43 **Data management and safety**

44  
45 After informed consent, the patient will be given a code. This code will be used on all (pseudonymized)  
46 data, including CLE images and electronic Case Report Form (eCRF) data. Castor Electronic Data  
47 Capture ecosystem (International Organization of Standardization (ISO) 27001 and 9001 certified) will  
48 be used to collect key patient information described in outcome parameters. The key to the code is  
49 safeguarded by the local principal investigator and access to all records is limited to directly involved  
50 researchers. The coordinating investigator will centralize patients' data, and principal investigators will  
51 have direct access to their own site's data sets and to other sites' data upon reasonable request. All  
52 principal investigators will maintain records, including signed patient informed consent forms and  
53 information on adverse events.  
54  
55  
56  
57  
58  
59  
60

1  
2  
3 Data management of all data (collection, storage, and analysis) will be done according to the local data  
4 management plan. All records will be stored for a period of 15 years following the completion or  
5 termination of the study. Monitoring will be done according to a monitoring plan with specific  
6 attention paid to informed consent, completion of the eCRF, and storage of CLE video data.  
7  
8  
9

## 10 11 12 **Patient safety and adverse events**

13  
14 The study was deemed a negligible risk study (according to the Nederlandse Federatie van  
15 Universitaire Medisch Centra (NFU) descriptions) by the ethical committee of the Amsterdam UMC.  
16 Previous study publications showed that nCLE-imaging and intravenous fluorescein administration are  
17 safe.(27) Fluorescein adverse reactions are rare and mostly mild in nature. No study related adverse  
18 events occurred in the prior bronchoscopic nCLE studies in the Amsterdam UMC.(18, 19) Estimated  
19 prolonged endoscopy time due to study participation is approximately 10 minutes. Patients will not  
20 be aware of this as they will already be sedated for the bronchoscopic procedure.  
21  
22  
23  
24  
25  
26

27  
28 In case any (serious) adverse event ((S)AE) occur during the procedure or up to one week after the  
29 procedure, the sponsor will register SAEs through the web portal *Toetsingonline* to the accredited  
30 METC that has approved the protocol. Adverse events are defined as any undesirable experience  
31 occurring to a subject during the study, whether or not considered related to the trial procedure. The  
32 severity and possible relatedness to the investigational product or the procedure will be documented.  
33 Investigators of the participating centers will report all serious adverse events to the coordinating and  
34 principal investigator of the initiating site. Reporting of SAEs that result in death or are life-threatening  
35 will be done within 7 days after initial identification, followed by a period of a maximum of 8 days to  
36 complete the preliminary report. All other SAEs will be reported within 15 days after first knowledge  
37 of the SAE.  
38  
39  
40  
41  
42  
43  
44  
45  
46

## 47 **Annual progress report**

48  
49 The sponsor will ensure that a progress report is submitted to the medical ethics committee once a  
50 year. Information on the start date of inclusion, number of subjects included to date, number of  
51 subjects that have completed participation, serious adverse events, and amendments.  
52  
53  
54

## 55 **Dissemination**

56  
57 We aim to publish the study results in a peer-reviewed journal. Reporting will be in line with CONSORT  
58 and STARD 2015 reporting guidelines.(28, 29)  
59  
60



## Discussion

In this multicenter, investigator-initiated, randomized controlled trial, we aim to determine if the addition of nCLE-imaging to bronchoscopic peripheral lung lesion analysis results in an improved diagnostic yield.

Since there still is a gap between the success rate of navigating the tissue sampling instrument toward the target lesion and the final diagnostic yield, there is a need for real-time tool-in-lesion confirmation. The addition of high-resolution microscopic nCLE imaging at the tip of the needle could potentially lead to a decrease in mispositioning rates and an improved diagnostic yield. As a result, fewer patients would need additional diagnostic procedures such as transthoracic needle biopsy or surgery, which are more invasive and have higher incidences of complications such as pneumothorax and hemorrhage.<sup>(30)</sup> Previous smaller studies have already shown that nCLE is safe, and raters can distinguish different image characteristics with high accuracy. On top of that, it has also been demonstrated that fine-tuning the needle based on these image characteristics is often done, even when navigation to the lesion was successful.<sup>(18-20)</sup> However, nCLE image interpretation remains subjective and challenging, especially when interpreting images live in the bronchoscopy suite. As described by Tian et al.<sup>(31)</sup>, the role of artificial intelligence might be important to make the technique routinely implementable in clinical practice. An exploratory endpoint of this study is to develop a deep-learning network for automated image interpretation. This is the first step towards easier, quicker and reproducible image interpretation.

Current literature on nCLE imaging for this purpose remains limited to smaller patient groups and the clinical benefit remains to be demonstrated. The results of the CLEVER study provide a formal comparison between conventional image-guided diagnostic bronchoscopy and conventional bronchoscopy with the addition of nCLE in a large randomized patient group. The results of this trial will clarify the added benefit of nCLE for bronchoscopic diagnosis of peripheral lung nodules and identify which patients could benefit from the use of this technique.

## Author contributions

SvH, TK, DAK, DMdB, PIB and JTA were involved in conception and trial design. SvH, TK, DAK, PIB and JTA were involved in drafting of the study protocol. DAK provided statistical expertise. All authors were involved in editing and final approval of the protocol. SvH, DG, CB, JH, KJ, VP, CR, AS, GS, KB, EK, NA, JV, ZS, MAH, JMAD, PIB and JTA will be involved in the conduct of the study and data acquisition. SvH,

1  
2  
3 DAK, DMdB, PIB and JTA will be involved in the data analysis and interpretation. SvH, DAK, PIB and JTA  
4 will be involved in drafting of the final manuscript for dissemination. All authors will provide editing  
5 and approval of the final manuscript for publication.  
6  
7  
8  
9

## 10 Funding

11  
12 This is an investigator-initiated study with financial and material support from Mauna Kea  
13 Technologies (9 Rue d'Enghien, 75010 Paris, France). The funder has no role in study design, data  
14 collection and analysis, decision to publish, or preparation of the manuscript.  
15  
16  
17

## 18 Declaration of interests

19  
20 JTA declares material and financial support to the sponsor's institution from Mauna Kea Technologies  
21 for this study. All Cellvizio equipment needed for the conduct of the study is provided in-kind to  
22 participating centers. All other authors declare no other conflicts of interest.  
23  
24  
25  
26  
27

## 28 Data sharing statement

29  
30 The final trial dataset will be available to study investigators on completion of the trial, and after  
31 publication of the primary manuscript. All data relevant to the study will be included in the article or  
32 uploaded as supplementary information. Data are available upon reasonable request.  
33  
34  
35  
36  
37

## 38 Bibliography

- 39  
40 1. Bade BC, Dela Cruz CS. Lung Cancer 2020: Epidemiology, Etiology, and Prevention. *Clin Chest*  
41 *Med.* 2020;41(1):1-24. doi:10.1016/j.ccm.2019.10.001.
- 42 2. Sung H, Ferlay J, Siegel RL, et al. Global Cancer Statistics 2020: GLOBOCAN Estimates of  
43 Incidence and Mortality Worldwide for 36 Cancers in 185 Countries. *CA: A Cancer Journal for*  
44 *Clinicians.* 2021;71(3):209-49. doi:10.3322/caac.21660.
- 45 3. Hoffman RM, Atallah RP, Struble RD, Badgett RG. Lung Cancer Screening with Low-Dose CT: a  
46 Meta-Analysis. *J Gen Intern Med.* 2020;35(10):3015-25. doi:10.1007/s11606-020-05951-7.
- 47 4. Hylgaard C, Trolle C, Harders SMW, et al. Increased use of diagnostic CT imaging increases  
48 the detection of stage IA lung cancer: pathways and patient characteristics. *BMC Cancer.*  
49 2022;22(1):464. doi:10.1186/s12885-022-09585-2.
- 50 5. Zhang EW, Shepard JO, Kuo A, et al. Characteristics and Outcomes of Lung Cancers Detected  
51 on Low-Dose Lung Cancer Screening CT. *Cancer Epidemiol Biomarkers Prev.* 2021;30(8):1472-9.  
52 doi:10.1158/1055-9965.Epi-20-1847.
- 53 6. Horeweg N, van der Aalst CM, Thunnissen E, et al. Characteristics of lung cancers detected by  
54 computer tomography screening in the randomized NELSON trial. *Am J Respir Crit Care Med.*  
55 2013;187(8):848-54. doi:10.1164/rccm.201209-1651OC.
- 56 7. Kramer T, Annema JT. Advanced bronchoscopic techniques for the diagnosis and treatment of  
57 peripheral lung cancer. *Lung Cancer.* 2021;161:152-62. doi:10.1016/j.lungcan.2021.09.015.  
58  
59  
60

8. Kops SEP, Heus P, Korevaar DA, et al. Diagnostic yield and safety of navigation bronchoscopy: A systematic review and meta-analysis. *Lung Cancer*. 2023;180:107196. doi:10.1016/j.lungcan.2023.107196.
9. Nadig TR, Thomas N, Nietert PJ, et al. Guided bronchoscopy for the evaluation of pulmonary lesions: An updated meta-analysis. *Chest*. 2023. doi:10.1016/j.chest.2022.12.044.
10. Chen A, Chenna P, Loiselle A, et al. Radial Probe Endobronchial Ultrasound for Peripheral Pulmonary Lesions. A 5-Year Institutional Experience. *Annals of the American Thoracic Society*. 2014;11(4):578-82. doi:10.1513/AnnalsATS.201311-384OC.
11. Mondoni M, Rinaldo RF, Carlucci P, et al. Bronchoscopic sampling techniques in the era of technological bronchoscopy. *Pulmonology*. 2022;28(6):461-71. doi:10.1016/j.pulmoe.2020.06.007.
12. Tang Y, Tian S, Chen H, et al. Transbronchial lung cryobiopsy for peripheral pulmonary lesions. A narrative review. *Pulmonology*. 2023. doi:10.1016/j.pulmoe.2023.08.010.
13. Chen AC, Pastis NJ, Jr., Mahajan AK, et al. Robotic Bronchoscopy for Peripheral Pulmonary Lesions: A Multicenter Pilot and Feasibility Study (BENEFIT). *Chest*. 2021;159(2):845-52. doi:10.1016/j.chest.2020.08.2047.
14. Chaddha U, Kovacs SP, Manley C, et al. Robot-assisted bronchoscopy for pulmonary lesion diagnosis: results from the initial multicenter experience. *BMC Pulmonary Medicine*. 2019;19(1):243. doi:10.1186/s12890-019-1010-8.
15. Gex G, Pralong JA, Combesure C, et al. Diagnostic yield and safety of electromagnetic navigation bronchoscopy for lung nodules: a systematic review and meta-analysis. *Respiration*. 2014;87(2):165-76. doi:10.1159/000355710.
16. Fugazza A, Gaiani F, Carra MC, et al. Confocal Laser Endomicroscopy in Gastrointestinal and Pancreatobiliary Diseases: A Systematic Review and Meta-Analysis. *Biomed Res Int*. 2016;2016:4638683. doi:10.1155/2016/4638683.
17. Goorsenberg A, Kalverda KA, Annema J, Bonta P. Advances in Optical Coherence Tomography and Confocal Laser Endomicroscopy in Pulmonary Diseases. *Respiration*. 2020;99(3):190-205. doi:10.1159/000503261.
18. Kramer T, Wijmans L, de Bruin M, et al. Bronchoscopic needle-based confocal laser endomicroscopy (nCLE) as a real-time detection tool for peripheral lung cancer. *Thorax*. 2022;77(4):370-7. doi:10.1136/thoraxjnl-2021-216885.
19. Wijmans L, Yared J, de Bruin DM, et al. Needle-based confocal laser endomicroscopy for real-time diagnosing and staging of lung cancer. *Eur Respir J*. 2019;53(6). doi:10.1183/13993003.01520-2018.
20. Manley CJ, Kramer T, Kumar R, et al. Robotic bronchoscopic needle-based confocal laser endomicroscopy to diagnose peripheral lung nodules. *Respirology*. 2022. doi:10.1111/resp.14438.
21. Vachani A, Maldonado F, Laxmanan B, et al. The Impact of Alternative Approaches to Diagnostic Yield Calculation in Studies of Bronchoscopy. *Chest*. 2022;161(5):1426-8. doi:10.1016/j.chest.2021.08.074.
22. Chauhan SS, Abu Dayyeh BK, Bhat YM, et al. Confocal laser endomicroscopy. *Gastrointestinal Endoscopy*. 2014;80(6):928-38. doi:10.1016/j.gie.2014.06.021.
23. Kramer T, Wijmans L, van Heumen S, et al. Needle-based confocal laser endomicroscopy for real-time granuloma detection. *Respirology*. 2023;28(10):934-41. doi:10.1111/resp.14542.
24. Ali MS, Trick W, Mba BI, et al. Radial endobronchial ultrasound for the diagnosis of peripheral pulmonary lesions: A systematic review and meta-analysis. *Respirology*. 2017;22(3):443-53. doi:10.1111/resp.12980.
25. Lee J, Song JU. Diagnostic yield of radial probe endobronchial ultrasonography-guided transbronchial biopsy without fluoroscopy in peripheral pulmonary lesions: A systematic review and meta-analysis. *Thorac Cancer*. 2023;14(2):195-205. doi:10.1111/1759-7714.14733.
26. McWilliams A, Tammemagi MC, Mayo JR, et al. Probability of cancer in pulmonary nodules detected on first screening CT. *N Engl J Med*. 2013;369(10):910-9. doi:10.1056/NEJMoa1214726.

- 1  
2  
3 27. Wallace MB, Meining A, Canto MI, et al. The safety of intravenous fluorescein for confocal  
4 laser endomicroscopy in the gastrointestinal tract. *Aliment Pharmacol Ther.* 2010;31(5):548-52.  
5 doi:10.1111/j.1365-2036.2009.04207.x.  
6  
7 28. Bossuyt PM, Reitsma JB, Bruns DE, et al. STARD 2015: an updated list of essential items for  
8 reporting diagnostic accuracy studies. *Bmj.* 2015;351:h5527. doi:10.1136/bmj.h5527.  
9  
10 29. Schulz KF, Altman DG, Moher D. CONSORT 2010 statement: updated guidelines for reporting  
11 parallel group randomised trials. *Bmj.* 2010;340:c332. doi:10.1136/bmj.c332.  
12  
13 30. Ho ATN, Gorthi R, Lee R, et al. Solitary Lung Nodule: CT-Guided Transthoracic Biopsy vs  
14 Transbronchial Biopsy With Endobronchial Ultrasound and Flexible Bronchoscope, a Meta-Analysis of  
15 Randomized Controlled Trials. *Lung.* 2023. doi:10.1007/s00408-023-00596-9.  
16  
17 31. Tian S, Huang H, Zhang Y, et al. The role of confocal laser endomicroscopy in pulmonary  
18 medicine. *Eur Respir Rev.* 2023;32(167). doi:10.1183/16000617.0185-2022.  
19  
20  
21  
22  
23  
24  
25  
26  
27  
28  
29  
30  
31  
32  
33  
34  
35  
36  
37  
38  
39  
40  
41  
42  
43  
44  
45  
46  
47  
48  
49  
50  
51  
52  
53  
54  
55  
56  
57  
58  
59  
60

For peer review only

## Figure headings

Figure 1: Study flowchart. r-EBUS: radial endobronchial ultrasound; EMN: electromagnetic navigation; VB: virtual bronchoscopy; nCLE: needle-based confocal laser endomicroscopy; TBNA: transbronchial needle aspiration; PET: positron emission tomography; CT: computed tomography

Figure 2: Procedure flowchart for control and interventional group (without and with nCLE). Note: fluorescein administration is only done once before the first puncture. TBNA: transbronchial needle aspiration; ROSE: rapid on-site evaluation; EBUS: endobronchial ultrasound; EMN: electromagnetic navigation; VB: virtual bronchoscopy; nCLE: needle-based confocal laser endomicroscopy

Figure 3: Flowchart explaining calculation methods of diagnostic yield and sensitivity of malignancy. SPB: specific benign; NSB: non-specific benign; ND: non-diagnostic; TP: true positive; TN: true negative; FN: false negative; CT: computed tomography

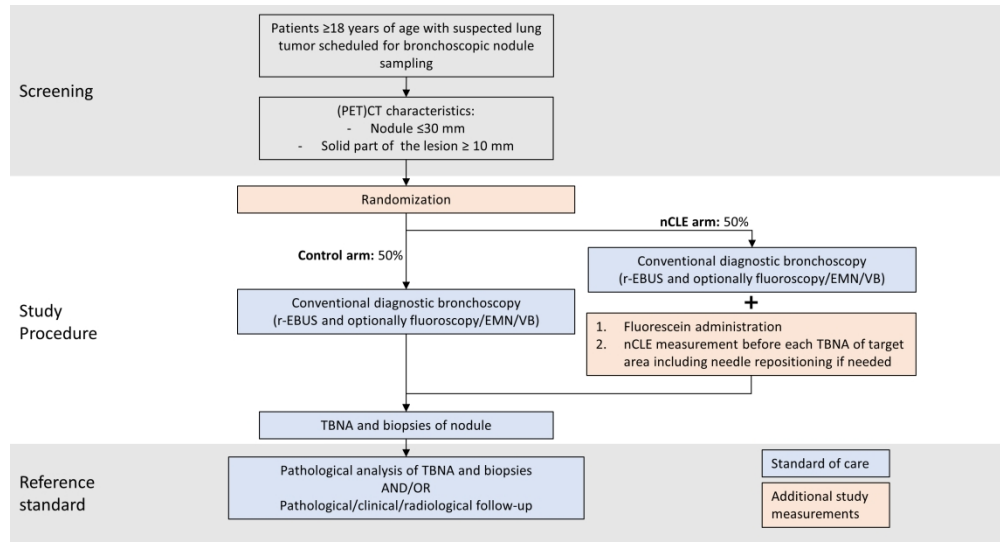

Figure 1: Study flowchart. r-EBUS: radial endobronchial ultrasound; EMN: electromagnetic navigation; VB: virtual bronchoscopy; nCLE: needle-based confocal laser endomicroscopy; TBNA: transbronchial needle aspiration; PET: positron emission tomography; CT: computed tomography

275x147mm (300 x 300 DPI)

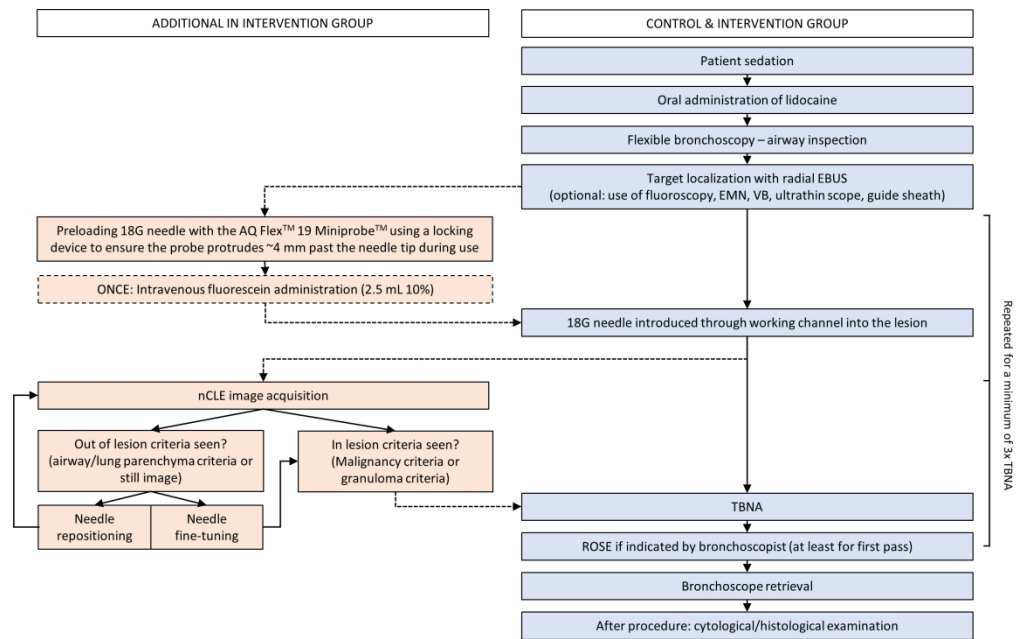

Figure 2: Procedure flowchart for control and interventional group (without and with nCLE). Note: fluorescein administration is only done once before the first puncture. TBNA: transbronchial needle aspiration; ROSE: rapid on-site evaluation; EBUS: endobronchial ultrasound; EMN: electromagnetic navigation; VB: virtual bronchoscopy; nCLE: needle-based confocal laser endomicroscopy

246x155mm (300 x 300 DPI)

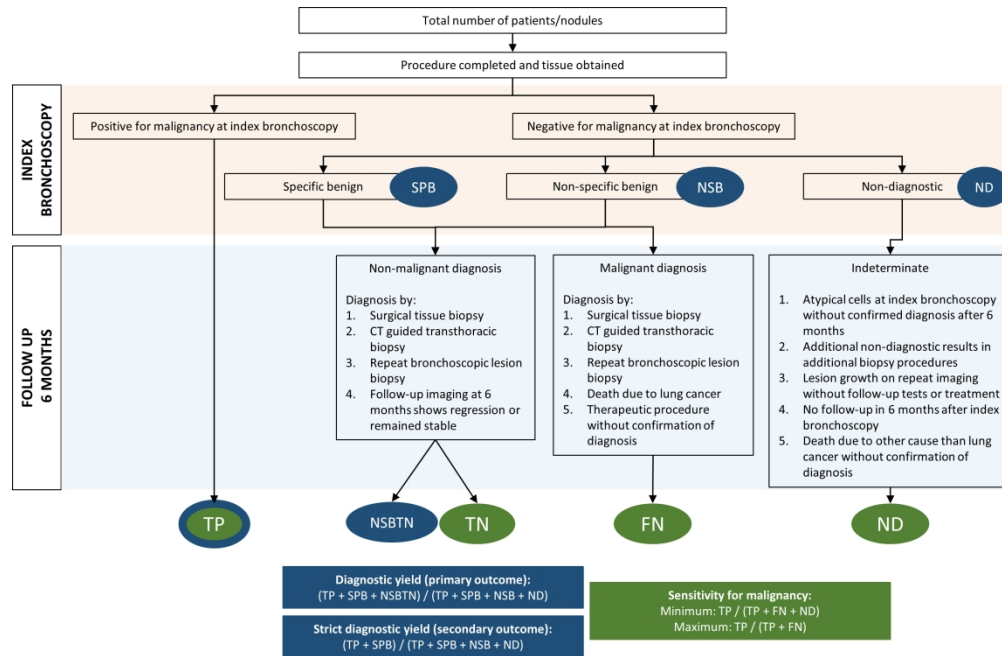

Figure 3: Flowchart explaining calculation methods of diagnostic yield and sensitivity of malignancy. SPB: specific benign; NSB: non-specific benign; ND: non-diagnostic; TP: true positive; TN: true negative; FN: false negative; CT: computed tomography

262x170mm (300 x 300 DPI)



Subject information

# Subject information for participation in medical research

## nCLE in lung tumors

*Official title: nCLE-guided bronchoscopy for peripheral lung cancer diagnosis; a randomized controlled trial*

### Introduction

Dear Sir/Madam,

With this letter, we would like to ask you to take part in a medical study. Participation is voluntary. You have received this letter because a scan showed an abnormality in the lung. You are scheduled for an examination of the lungs (bronchoscopy) to establish a diagnosis. You can read about the medical study in this information sheet, what it means for you, and what the pros and cons are. It is a lot of information. Can you please read the information and decide if you want to take part? If you want to take part, complete the form in Appendix D.

### Ask your questions

You can take your decision based on the information in this information sheet. We also suggest that you do this:

- Put your questions to the investigator who gave you this information.
- Talk to your partner, family or friends about this study.

## 1. General information

The Amsterdam University Medical Center (Amsterdam UMC), location AMC in The Netherlands has set up this study and is funded by Mauna Kea Technologies, a company specialized in making instruments used during bronchoscopy. Below, we always call the Amsterdam UMC the 'sponsor'.

Investigators, these can be doctors/research nurses, conduct the study in different hospitals.

Participants in medical research are often referred to as subjects.

This study needs 208 subjects from different countries. In [country], it is expected that 30 - 40 subjects will take part.

The Medical Ethics Review Committee Amsterdam UMC has initially approved this study in The Netherlands. The Medical Ethics Review Committee [X] has also approved the start of this study in [country].

Subject information

## 2. What is the purpose of the study?

With this study we investigate the addition of confocal laser endomicroscopy (CLE) to the regular bronchoscopic examination. We investigate whether the addition of CLE contributes to the accurate diagnosis of suspected lung abnormalities compared to normal diagnostic bronchoscopy without the addition of CLE.

## 3. What is the background of the study?

Abnormalities in the lungs can be a results of many different conditions. With current techniques used to visualize these abnormalities (PET-CT scan, CT scan and ultrasound) it is not always possible to say with certainty what causes the abnormality. Therefore, it is often decided to perform a bronchoscopy. During the examination, the suspected lung abnormality is localized in the lungs and some tissue is extracted with a thin needle of for further examination. The current tissue examination has limitations because tissue is not always obtained from the optimal site. As a result, the cause of the abnormality cannot always be diagnosed with certainty.

The newly available technique confocal laser endomicroscopy (CLE) offers possibilities to potentially establish a diagnosis with more certainty. The CLE technique works like a microscope where individual cells can be imaged with safe laser light. The CLE laser beam can be emitted into the tissue via the thin needle used for the standard bronchoscopy exam. By using CLE imaging at the tip of the needle, we expect to be able to extract tissue at the right place in more cases. We also call this the 'smart needle'.

The advantage of this technique is that a lung abnormality can be accurately imaged inside the body. However, it is not yet sufficiently known how and to what extent we can establish a better diagnosis if we use the 'smart needle'. That is why we are investigating whether adding the CLE technique to the existing standard examination leads to a better diagnosis.

## 4. What happens during the study?

*How long will the study take?*

Are you taking part in the study? The bronchoscopy will approximately take 10 minutes longer than usual. Because of the sedative that we administer during the bronchoscopy, you will not notice the extended duration of the procedure.

*Step 1: are you eligible to take part?*

First, we want to know if you are eligible to take part. The investigator will assess whether you are eligible based on your scans (PET-CT or CT scan). Your physician will discuss your potential participation with you.

*Step 2: the bronchoscopy*

## Subject information

As part of standard care, you will undergo a bronchoscopy exam via the trachea. A sedative will be administered through an IV in your arm to ensure you don't notice anything during the examination.

For the study, we will use the CLE-technique as an addition to the bronchoscopy exam in 50% of participants.

For this study, we will have 2 groups:

- Group 1. The participants in this group undergo the regular bronchoscopy exam without the addition of the CLE technique.
- Group 2. The participants in this group undergo the regular bronchoscopy exam with the addition of the CLE technique.

A draw will decide in which group you are in. Before the start of the bronchoscopy, you will not know which group you were assigned to.

First the bronchoscopy will start. The lungs will be inspected and we will search for the lung abnormality located deeper in the lungs. As part of the standard procedure, a needle will be used to puncture the suspected lung lesion to extract tissue samples for diagnosis. In case you were assigned to group 2 (i.e., implementation of the CLE technique), CLE images will be acquired at the tip of the needle used for tissue sampling. Administration of a contrast dye (fluorescein) is needed for CLE imaging. This dye will be administered via an IV which is also used to administer sedatives.

*What is the difference with standard care?*

This study is not very different from standard care. Due to participation in the study, the bronchoscopy may approximately take 10 minutes longer. You will not notice this because of the sedative. No additional body material is collected for this study. If you are placed in the group in which CLE is done in addition to the normal procedure, the safe dye fluorescein will also be administered.

After the bronchoscopy, you will stay in the recovery room for approximately 1.5 hours, which is standard protocol after a normal bronchoscopic exam. You do not have to come to the hospital for an extra visit if you participate in this study.

## **5. What agreements do we make with you?**

If you participate in this study, you have to follow the instructions your doctor gave you for the regular bronchoscopy. In total, the bronchoscopy will be extended by a maximum of 10 minutes due to the extra study measurements.

To obtain good images with the CLE method, it is essential that the fluorescein dye is administered via the IV. Fluorescein is a commonly used and safe drug. A small proportion of people (1.1%) may experience side effects such as nausea. In case you have a known sensitivity to fluorescein, you should not participate in this study. Consult your doctor if this applies to you.

Subject information

*Is it OK for you to get pregnant during the study?*

Women who are pregnant or breastfeeding cannot take part in this study. This is because it is not known what the effects of fluorescein are during pregnancy or breastfeeding.

## **6. What side effects, adverse events or discomforts could you experience?**

Few risks are associated with the CLE technique. Extensive research has been done and the CLE technique has been assessed as safe.

To obtain good image quality with the CLE method, it is essential that fluorescein dye is administered via your IV. Fluorescein is a widely used and safe contrast dye and side effects are rarely reported. About one in hundred people develop side effects of which nausea, vomiting and a rash are most commonly seen. Please let the doctor or researcher know if you experience any of these side effects.

You can find more information about fluorescein in the information leaflet, see Appendix C.

*What are the possible discomforts you may experience with checks or measurements during the study?*

Due acquisition of the CLE images, the bronchoscopy can take about 10 minutes longer than usual. You will be given sedatives as part of the standard bronchoscopy protocol and will therefore hardly notice the additional 10 minutes during the exam. After administration of fluorescein, your urine can be more yellow than usual for a day, this is normal.

## **7. What are the pros and cons if you take part in the study?**

Taking part in the study can have pros and cons, listed below. Think about this carefully and talk to other people about it.

If you participate in this research you will not have a direct benefit. In case you are assigned to group B in which CLE is used in addition to the normal bronchoscopy, there might be a higher chance of a diagnosis. However, the purpose of this research is to investigate if that is the case. If you take part you will help with the search for better diagnostics of lung abnormalities.

Taking part in the study can have these cons:

- You may experience side effects or adverse events from the fluorescein drug.
- The bronchoscopy will be 10 minutes longer than usual.

*You do not wish to participate in the study?*

It is up to you to decide if you wish to participate in the study. You do not wish to participate? Then the regular bronchoscopy exam will be done.

## **8. When does the study end?**

## Subject information

The investigator will let you know if there is any new information about the study that is important to you. The investigator will then ask you if you want to continue to take part.

In these situations, the study will stop for you:

- All checks are finished and you are discharged from the hospital.
- You want to stop participating in the study yourself. You can stop at any time. Report this to the investigator immediately. You do not have to explain why you want to stop. You will then get the standard bronchoscopy exam.
- The investigator thinks it is better for you to stop.
- One of the following authorities decides that the study should stop:
  - The government, or
  - The Medical Ethics Review Committee assessing the study, or
  - The Sponsor,

*What happens if you stop participating in the study?*

The investigators use the data that have been collected up to the moment that you decide to stop participating in the study.

## 9. What happens after the study has ended?

*Will you get the results of the study?*

If there is new information about the study that is important for you, the investigator will let you know what the main findings are. The researcher can also tell you which group you were in. Do you prefer not to know? Please tell the investigator. He/she will not tell you in that case.

## 10. What will be done with your data?

Are you taking part in the study? Then you also give your consent to collect, use and store your data.

*What data do we store?*

We store these data:

- your gender
- your date of birth
- information about your health
- (medical) information we collect during the study
- CLE videos

*Why do we collect, use and store your data?*

We collect, use and store your data to answer the questions of this study. And to be able to publish the results. Data can be used by the sponsor to perform analysis of the data. The company that support this research (Mauna Kea Technologies) will receive anonymized CLE videos upon reasonable request. This data will only be shared anonymously and cannot be traced back to you.

## Subject information

### *How do we protect your privacy?*

To protect your privacy, we give a code to your data. We only put this code on your data. We keep the key to the code in a safe place in the hospital. When we process your data we always use only that code. Even in reports and publications about the study, nobody will be able to see that it was about you.

### *Who can see your data?*

Some people can see your name and other personal information without a code. This could include data specifically collected for this study, but also data from your medical file. These are people checking whether the investigators are carrying out the study properly and reliably. These persons can access your data:

- An auditor who works for the investigator or sponsor
- National and international supervisory authorities.
- [other]

These people will keep your information confidential. We ask you to give permission for this access.

### *For how long do we store your data?*

We store your data in the hospital for [..] years. And for 15 years with the sponsor.

### *Can we use your data for other research?*

Your collected data may also be important for other medical research on suspected lung lesions and diagnostics. For this purpose, your data will be stored in the hospital for X years. Please indicate in the consent form whether you agree with this. Do you not want to give your consent? Then you can still take part in this study. You will get the same healthcare.

### *Can you take back your consent for the use of your data?*

You can take back your consent for the use of your data at any time. Please tell the investigator if you wish to do so. But please note: if you take back your consent, and the investigators have already collected data for research, they are still allowed to use this information.

### *Do you want to know more about your privacy?*

- Do you want to know more about your rights when processing personal data? Visit [URL]
- Do you have questions about your rights? Or do you have a complaint about the processing of your personal data? Please contact the person who is responsible for processing your personal data. For the present, this is:
  - The Amsterdam UMC and [institution] See Appendix A for contact details and website(s).
- If you have any complaints about the processing of your personal data, we recommend that you first discuss them with the research team. You can also contact

Subject information

1  
2  
3 the Data Protection Officer of [the institution]. Or you can submit a complaint to the  
4 Dutch Data Protection Authority.  
5  
6

7 *Where can you find more information about the study?*

8 You can find more information about the study on the following website (s).

9 [www.ClinicalTrials.gov](http://www.ClinicalTrials.gov). After the study, the website may show a summary of the results of  
10 this study. You can find the study by searching for “*Confocal Laser Endomicroscopy*  
11 *VERification*” (number: NCT06079970).  
12  
13  
14

### 15 **11. Will you receive compensation if you participate in the study?**

16 Participation in the study will not cost you anything. Neither will you get any compensation if  
17 you take part in this study. Because no additional travel expenses are made for participation,  
18 you will not be reimbursed for travel expenses.  
19  
20  
21

### 22 **12. Are you insured during the study?**

23 Insurance has been taken out for everyone who takes part in this study. The insurance pays  
24 for damage caused by the study. But not for all damage. You can find more information about  
25 this insurance and any exceptions in **Appendix B**. It also says who you can report damage  
26 to.  
27  
28  
29

### 30 **13. Informing other physicians**

31 The pulmonologist who performs the bronchoscopy knows that you are participating in the  
32 study. We do not inform your general practitioner or other treating specialists that you are  
33 participating, given that the study does not have any complications or additional risks that  
34 your general practitioner or other treating physician should be aware of.  
35  
36  
37  
38

### 39 **14. Do you have any questions?**

40 You can ask questions about the study to the research team.

41 Do you have a complaint? Discuss it with the investigator or the doctor who is treating you. If  
42 you prefer not to do so, please visit [complaints officer/complaints committee of your  
43 hospital/institute/other]. Appendix A tells you where to find this.  
44  
45  
46  
47

### 48 **15. How do you give consent for the study?**

49 You can first think carefully about this study. Then you tell the investigator if you understand  
50 the information and if you want to take part or not. If you want to take part, fill in the consent  
51 form that you can find with this information sheet. You and the investigator will both get a  
52 signed version of this consent form.  
53  
54  
55

56 Thank you for your attention.  
57  
58  
59  
60

Subject information

1  
2  
3  
4  
5  
6  
7  
8  
9  
10  
11  
12  
13  
14  
15  
16  
17  
18  
19  
20  
21  
22  
23  
24  
25  
26  
27  
28  
29  
30  
31  
32  
33  
34  
35  
36  
37  
38  
39  
40  
41  
42  
43  
44  
45  
46  
47  
48  
49  
50  
51  
52  
53  
54  
55  
56  
57  
58  
59  
60

## 16. Appendices tot his information

- A. Contact details
- B. Information about the insurance
- C. Information leaflet fluorescein for patients
- D. Consent form

For peer review only



Subject information

1  
2  
3 **Bijlage A: contact details for [name of participating centre]**  
4  
5

6 **Principal investigator:**

7 [for principal investigator of centre: name, contact details and accessibility]  
8  
9

10 < if applicable >

11 **Co-investigator:**

12  
13  
14 < if applicable >

15 [Study nurse/study doctor/nurse specialist]:  
16  
17

18 < if applicable > **Independent expert:**

19 [name, type of doctor/expert, contact details and accessibility]  
20  
21

22 **Complaints:** [service or person with contact details and accessibility]  
23  
24

25 **Data Protection Officer:**

26 Data protection officer of the institution: [contact details]

27 Data Protection Officer of the Sponsor: privacy@amsterdamumc.nl  
28  
29

30 For more information about your rights visit: [Contact details [including website]]  
31  
32  
33  
34  
35  
36  
37  
38  
39  
40  
41  
42  
43  
44  
45  
46  
47  
48  
49  
50  
51  
52  
53  
54  
55  
56  
57  
58  
59  
60

Subject information

## Appendix B: information about the insurance

The [Institution] has taken out insurance for everyone who takes part in the study. The insurance pays for the damage you have suffered because you participated in the study. This concerns damage you suffer during the study or within 4 years after you participated in the study. You must report damage to the insurer within 4 years.

Have you suffered damage as a result of the study? Please report this to this insurer:

*<also indicate here how subject should act/report in the event of damage:  
telephone/mail/post, other instructions?*

The insurer of the study is:

Name insurer: ...

Address: ...

Telephone number: ...

Email: ...

(Policy number: ...)

*< include only if there is a claims representative – this is compulsory if the insurer is established outside the Netherlands>*

The claims representative of the study is:

Name: ...

Address: ...

Email: ...

Telephone number: ...

The insurance pays a maximum of *<amount to be copied from policy, this must be at least €650,000 >* per person and *<amount to be copied from policy, this must be at least €5,000,000>* for the entire study (and *<amount to be copied from policy, this must be at least € 7,500,000>* per year for all studies by the same sponsor).

Please note that the insurance does **not** cover the following damage:

- Damage due to a risk about which we have given you information in this sheet. But this does not apply if the risk turned out to be greater than we previously thought. Or if the risk was very unlikely.
- Damage to your health that would also have happened if you had not taken part in the study.
- Damage that happens because you did not follow directions or instructions or did not follow them properly.
- Damage caused by a treatment method that already exists. Or by research into a treatment method that already exists.

## Subject information

1  
2  
3 These provisions can be found in the 'Besluit verplichte verzekering bij medisch-  
4 wetenschappelijk onderzoek met mensen 2015' ('Medical Research (Human Subjects)  
5 Compulsory Insurance Decree 2015'). This decision can be found in the Government Law  
6 Gazette (<https://wetten.overheid.nl>).  
7  
8  
9  
10  
11  
12  
13  
14  
15  
16  
17  
18  
19  
20  
21  
22  
23  
24  
25  
26  
27  
28  
29  
30  
31  
32  
33  
34  
35  
36  
37  
38  
39  
40  
41  
42  
43  
44  
45  
46  
47  
48  
49  
50  
51  
52  
53  
54  
55  
56  
57  
58  
59  
60

For peer review only

Subject information

## Appendix C – Information leaflet fluorescein for patients

*The name of this medicine is Fluorescein Sodium 100mg/ml Solution for Injection, which will be referred to as Fluorescein Sodium Injection throughout this leaflet.*

Read all of this leaflet carefully before you are given this medicine because it contains important information for you.

- Keep this leaflet. You may need to read it again.
- If you have any further questions, ask your doctor, pharmacist or nurse.
- This medicine has been prescribed for you only. Do not pass it on to others. It may harm them, even if their signs of illness are the same as yours.
- If you get any side effects talk to your doctor, pharmacist or nurse. This includes any possible side effects not listed in this leaflet.

### IN THIS LEAFLET

1. What Fluorescein Sodium Injection is and what it is used for
2. What you need to know before you are given Fluorescein Sodium Injection
3. How to use Fluorescein Sodium Injection
4. Possible side effects
5. How to store Fluorescein Sodium Injection

#### 1. What Fluorescein Sodium Injection is and what it is used for

Fluorescein Sodium Injection contains the active ingredient fluorescein sodium which works as a diagnostic stain. It is used in a hospital-based procedure on for example the eye called fluorescein angiography of the ocular fundus (part of the eye). This medicinal product is for diagnostic use only.

#### 2. What you need to know before you are given Fluorescein Sodium Injunctio

Do not use Fluorescein Sodium Injection if:

- you are allergic (hypersensitive) to fluorescein sodium or any of the other ingredients of this medicine.

If the above applies to you or you are in any doubt you should ask your doctor or pharmacist for advice before being given this medicine.

#### Warning and Precautions:

Your doctor or other healthcare professional will give you this medicine through an injection into one of your veins. Fluorescein Sodium Injection is for intravenous injection only and **MUST NOT** be injected into the arteries (arterial route) or into the spinal column (intrathecal route).

#### You must tell your doctor if:

#### Subject information

- You have previously undergone a hospital procedure on the eye called fluorescein angiography of the ocular fundus (a part of the eye)
- You have a history of allergy
- You have a history of heart or pulmonary disease
- You are taking drugs known as Beta-blockers including those applied in eye drops.
- You have kidney disease

#### **Taking other medicines**

Tell your doctor or pharmacist if you are taking, have recently taken or might take any other medicines including medicines obtained without a prescription. Fluorescein sodium can sometimes interact with other medicines that you could be taking causing unwanted side effects.

Preferably do not add anything. Fluorescein disodium is incompatible with acids, salts of acids and salts of heavy metals. Please inform your doctor or pharmacist if you are taking or have recently taken any other medicines. This also applies to medicines that you can obtain without a prescription.

#### **If you are due to have other diagnostic tests including blood, urine, and X-Ray investigations**

Fluorescein Sodium Injection may interfere with the results of some blood and urine tests within 3 days of having the procedure. If you are having any blood or urine tests taken, you should tell the doctor or nurse that you have been given Fluorescein Sodium Injection.

If an X-ray procedure is conducted within 36 hours of injection, the resulting high visibility of some organs such as the kidneys may lead to misinterpretation of the results.

#### **Pregnancy, breastfeeding and fertility**

If you are pregnant or think you may be pregnant prior to using Fluorescein Sodium Injection, tell your doctor who will decide whether to give you this medicine or not.

Fluorescein disodium should not be used during breast-feeding. Ask your doctor or pharmacist for advice before taking any medicine.

#### **Driving or operating machinery**

The use of Fluorescein Sodium during certain procedures, your vision may be temporarily impaired. Patients must abstain from driving a vehicle or operating machinery until the eyesight returns to normal.

#### **3. How to use Fluorescein Sodium 100mg/ml?**

Fluorescein disodium is injected directly into the bloodstream.

Dosage:

Subject information

The exact dose, to be determined by the doctor, is up to a maximum dose of Fluorescein sodium 500mg (equivalent to one 5ml ampoule 100 mg/ml) administered by intravenous injection.

#### 4. Possible side effects

Like all medicines, this medicine can cause side effects, although not everybody gets them. If you have undergone a similar examination, please tell your doctor if you have experienced an intolerance reaction regardless of how severe it may or may not have been.

The following side effects may occur during administration:

- nausea and vomiting,
- allergic reactions such as skin rash with intense itching and lump formation (urticaria), increased salivation (hypersalivation), runny nose (rhinorrhoea) and fever
- decreased number of blood platelets (thrombocytopenia)
- the appearance of fluid in the lungs (pulmonary oedema)
- temporary discoloration (yellowing) of the skin and urine
- anaphylactic reaction – anaphylactic shock

If you notice any side effects not listed in this leaflet or which you consider to be serious, please inform your doctor or pharmacist.

#### 5. How to store Fluorescein Sodium 100 mg/ml

Keep this medicine out of reach and sight of children. Keep ampoules in a cardboard box in order to protect from light

Use by date: Do not use this medicine after the expiry date which is stated on the carton and ampoule label after EXP. The expiry date refers to the last day of that month.

Do not use Fluorescein disodium if you notice that the solution is no longer completely clear or the ampoule is damaged.

For single use only. Once opened the ampoule must be used immediately.

Any unused product or waste material should be disposed of in accordance with local requirements.

Subject information

**Appendix D: Informed consent form – subject**

Belonging to nCLE in lung tumors

- I have read the information sheet. I was able to ask questions. My questions have been answered well enough. I had enough time to decide if I wanted to take part.
- I know that taking part is voluntary. I also know that at any time I can decide not to take part in the study. Or to stop taking part. I do not have to explain why.
- I give consent to collect and use my data. The investigators only do this to answer the question of this study.
- I know that some people will be able to see all of my data to review the study. These people are mentioned in this information sheet. I give consent to let them see my data for this review.
- I know that I cannot be pregnant during the study.
- Please tick yes or no in the table below.

|                                                                                                |                                 |                             |
|------------------------------------------------------------------------------------------------|---------------------------------|-----------------------------|
| I give consent to store my data to use for other research, as stated in the information sheet. | Yes<br><input type="checkbox"/> | No <input type="checkbox"/> |
| I give consent to ask me after this study if I want to participate in a follow-up study.       | Yes<br><input type="checkbox"/> | No <input type="checkbox"/> |
| I give consent to let me know after the study which treatment I received/in which group I was. | Yes<br><input type="checkbox"/> | No <input type="checkbox"/> |

- I want to take part in this study.

My name is (subject): .....

Signature: .....

Date : \_\_/\_\_/\_\_

-----

I declare that I have fully informed this subject about the study mentioned.

If any information becomes known during the study that could influence the subject's consent, I will let this subject know in good time.

Investigator name (or their representative): .....

Signature:.....

Date: \_\_/\_\_/\_\_

-----

*The study subject will receive a complete information sheet, together with a signed version of the consent form.*

# Reporting checklist for protocol of a clinical trial.

Based on the SPIRIT guidelines.

## Instructions to authors

Complete this checklist by entering the page numbers from your manuscript where readers will find each of the items listed below.

Your article may not currently address all the items on the checklist. Please modify your text to include the missing information. If you are certain that an item does not apply, please write "n/a" and provide a short explanation.

Upload your completed checklist as an extra file when you submit to a journal.

In your methods section, say that you used the SPIRIT reporting guidelines, and cite them as:

Chan A-W, Tetzlaff JM, Gøtzsche PC, Altman DG, Mann H, Berlin J, Dickersin K, Hróbjartsson A, Schulz KF, Parulekar WR, Krleža-Jerić K, Laupacis A, Moher D. SPIRIT 2013 Explanation and Elaboration: Guidance for protocols of clinical trials. *BMJ*. 2013;346:e7586

|                                             |                     | Reporting Item                                                                                               | Page Number |
|---------------------------------------------|---------------------|--------------------------------------------------------------------------------------------------------------|-------------|
| <b>Administrative information</b>           |                     |                                                                                                              |             |
| Title                                       | <a href="#">#1</a>  | Descriptive title identifying the study design, population, interventions, and, if applicable, trial acronym | 1           |
| Trial registration                          | <a href="#">#2a</a> | Trial identifier and registry name. If not yet registered, name of intended registry                         | 2           |
| Trial registration: data set                | <a href="#">#2b</a> | All items from the World Health Organization Trial Registration Data Set                                     | NA          |
| Protocol version                            | <a href="#">#3</a>  | Date and version identifier                                                                                  | NA          |
| Funding                                     | <a href="#">#4</a>  | Sources and types of financial, material, and other support                                                  | 15          |
| Roles and responsibilities: contributorship | <a href="#">#5a</a> | Names, affiliations, and roles of protocol contributors                                                      | 1 and 14    |



|    |                           |                     |                                                        |           |
|----|---------------------------|---------------------|--------------------------------------------------------|-----------|
| 1  | Roles and                 | <a href="#">#5b</a> | Name and contact information for the trial sponsor     | 1 and 14  |
| 2  | responsibilities:         |                     |                                                        |           |
| 3  | sponsor contact           |                     |                                                        |           |
| 4  | information               |                     |                                                        |           |
| 5  |                           |                     |                                                        |           |
| 6  |                           |                     |                                                        |           |
| 7  |                           |                     |                                                        |           |
| 8  | Roles and                 | <a href="#">#5c</a> | Role of study sponsor and funders, if any, in study    | 1, 14, 15 |
| 9  | responsibilities:         |                     | design; collection, management, analysis, and          |           |
| 10 | sponsor and funder        |                     | interpretation of data; writing of the report; and the |           |
| 11 |                           |                     | decision to submit the report for publication,         |           |
| 12 |                           |                     | including whether they will have ultimate authority    |           |
| 13 |                           |                     | over any of these activities                           |           |
| 14 |                           |                     |                                                        |           |
| 15 |                           |                     |                                                        |           |
| 16 |                           |                     |                                                        |           |
| 17 | Roles and                 | <a href="#">#5d</a> | Composition, roles, and responsibilities of the        | NA        |
| 18 | responsibilities:         |                     | coordinating centre, steering committee, endpoint      |           |
| 19 | committees                |                     | adjudication committee, data management team,          |           |
| 20 |                           |                     | and other individuals or groups overseeing the         |           |
| 21 |                           |                     | trial, if applicable (see Item 21a for data            |           |
| 22 |                           |                     | monitoring committee)                                  |           |
| 23 |                           |                     |                                                        |           |
| 24 |                           |                     |                                                        |           |
| 25 |                           |                     |                                                        |           |
| 26 |                           |                     |                                                        |           |
| 27 | <b>Introduction</b>       |                     |                                                        |           |
| 28 |                           |                     |                                                        |           |
| 29 | Background and            | <a href="#">#6a</a> | Description of research question and justification     | 3         |
| 30 | rationale                 |                     | for undertaking the trial, including summary of        |           |
| 31 |                           |                     | relevant studies (published and unpublished)           |           |
| 32 |                           |                     | examining benefits and harms for each                  |           |
| 33 |                           |                     | intervention                                           |           |
| 34 |                           |                     |                                                        |           |
| 35 |                           |                     |                                                        |           |
| 36 |                           |                     |                                                        |           |
| 37 |                           |                     |                                                        |           |
| 38 | Background and            | <a href="#">#6b</a> | Explanation for choice of comparators                  | 3         |
| 39 | rationale: choice of      |                     |                                                        |           |
| 40 | comparators               |                     |                                                        |           |
| 41 |                           |                     |                                                        |           |
| 42 |                           |                     |                                                        |           |
| 43 | Objectives                | <a href="#">#7</a>  | Specific objectives or hypotheses                      | 4         |
| 44 |                           |                     |                                                        |           |
| 45 | Trial design              | <a href="#">#8</a>  | Description of trial design including type of trial    | 4         |
| 46 |                           |                     | (eg, parallel group, crossover, factorial, single      |           |
| 47 |                           |                     | group), allocation ratio, and framework (eg,           |           |
| 48 |                           |                     | superiority, equivalence, non-inferiority,             |           |
| 49 |                           |                     | exploratory)                                           |           |
| 50 |                           |                     |                                                        |           |
| 51 |                           |                     |                                                        |           |
| 52 |                           |                     |                                                        |           |
| 53 |                           |                     |                                                        |           |
| 54 | <b>Methods:</b>           |                     |                                                        |           |
| 55 | <b>Participants,</b>      |                     |                                                        |           |
| 56 | <b>interventions, and</b> |                     |                                                        |           |
| 57 | <b>outcomes</b>           |                     |                                                        |           |
| 58 |                           |                     |                                                        |           |
| 59 |                           |                     |                                                        |           |
| 60 |                           |                     |                                                        |           |

|    |                                 |                      |                                                                                                                                                                                                                                                                                                                                                                                |         |
|----|---------------------------------|----------------------|--------------------------------------------------------------------------------------------------------------------------------------------------------------------------------------------------------------------------------------------------------------------------------------------------------------------------------------------------------------------------------|---------|
| 1  | Study setting                   | <a href="#">#9</a>   | Description of study settings (eg, community clinic, academic hospital) and list of countries where data will be collected. Reference to where list of study sites can be obtained                                                                                                                                                                                             | 4       |
| 2  |                                 |                      |                                                                                                                                                                                                                                                                                                                                                                                |         |
| 3  |                                 |                      |                                                                                                                                                                                                                                                                                                                                                                                |         |
| 4  |                                 |                      |                                                                                                                                                                                                                                                                                                                                                                                |         |
| 5  |                                 |                      |                                                                                                                                                                                                                                                                                                                                                                                |         |
| 6  |                                 |                      |                                                                                                                                                                                                                                                                                                                                                                                |         |
| 7  |                                 |                      |                                                                                                                                                                                                                                                                                                                                                                                |         |
| 8  | Eligibility criteria            | <a href="#">#10</a>  | Inclusion and exclusion criteria for participants. If applicable, eligibility criteria for study centres and individuals who will perform the interventions (eg, surgeons, psychotherapists)                                                                                                                                                                                   | 5,6     |
| 9  |                                 |                      |                                                                                                                                                                                                                                                                                                                                                                                |         |
| 10 |                                 |                      |                                                                                                                                                                                                                                                                                                                                                                                |         |
| 11 |                                 |                      |                                                                                                                                                                                                                                                                                                                                                                                |         |
| 12 |                                 |                      |                                                                                                                                                                                                                                                                                                                                                                                |         |
| 13 |                                 |                      |                                                                                                                                                                                                                                                                                                                                                                                |         |
| 14 |                                 |                      |                                                                                                                                                                                                                                                                                                                                                                                |         |
| 15 | Interventions: description      | <a href="#">#11a</a> | Interventions for each group with sufficient detail to allow replication, including how and when they will be administered                                                                                                                                                                                                                                                     | 9,10    |
| 16 |                                 |                      |                                                                                                                                                                                                                                                                                                                                                                                |         |
| 17 |                                 |                      |                                                                                                                                                                                                                                                                                                                                                                                |         |
| 18 |                                 |                      |                                                                                                                                                                                                                                                                                                                                                                                |         |
| 19 |                                 |                      |                                                                                                                                                                                                                                                                                                                                                                                |         |
| 20 | Interventions: modifications    | <a href="#">#11b</a> | Criteria for discontinuing or modifying allocated interventions for a given trial participant (eg, drug dose change in response to harms, participant request, or improving / worsening disease)                                                                                                                                                                               | NA      |
| 21 |                                 |                      |                                                                                                                                                                                                                                                                                                                                                                                |         |
| 22 |                                 |                      |                                                                                                                                                                                                                                                                                                                                                                                |         |
| 23 |                                 |                      |                                                                                                                                                                                                                                                                                                                                                                                |         |
| 24 |                                 |                      |                                                                                                                                                                                                                                                                                                                                                                                |         |
| 25 |                                 |                      |                                                                                                                                                                                                                                                                                                                                                                                |         |
| 26 |                                 |                      |                                                                                                                                                                                                                                                                                                                                                                                |         |
| 27 | Interventions: adherence        | <a href="#">#11c</a> | Strategies to improve adherence to intervention protocols, and any procedures for monitoring adherence (eg, drug tablet return; laboratory tests)                                                                                                                                                                                                                              | 11      |
| 28 |                                 |                      |                                                                                                                                                                                                                                                                                                                                                                                |         |
| 29 |                                 |                      |                                                                                                                                                                                                                                                                                                                                                                                |         |
| 30 |                                 |                      |                                                                                                                                                                                                                                                                                                                                                                                |         |
| 31 |                                 |                      |                                                                                                                                                                                                                                                                                                                                                                                |         |
| 32 | Interventions: concomitant care | <a href="#">#11d</a> | Relevant concomitant care and interventions that are permitted or prohibited during the trial                                                                                                                                                                                                                                                                                  | 9, 10   |
| 33 |                                 |                      |                                                                                                                                                                                                                                                                                                                                                                                |         |
| 34 |                                 |                      |                                                                                                                                                                                                                                                                                                                                                                                |         |
| 35 |                                 |                      |                                                                                                                                                                                                                                                                                                                                                                                |         |
| 36 | Outcomes                        | <a href="#">#12</a>  | Primary, secondary, and other outcomes, including the specific measurement variable (eg, systolic blood pressure), analysis metric (eg, change from baseline, final value, time to event), method of aggregation (eg, median, proportion), and time point for each outcome. Explanation of the clinical relevance of chosen efficacy and harm outcomes is strongly recommended | 6,7     |
| 37 |                                 |                      |                                                                                                                                                                                                                                                                                                                                                                                |         |
| 38 |                                 |                      |                                                                                                                                                                                                                                                                                                                                                                                |         |
| 39 |                                 |                      |                                                                                                                                                                                                                                                                                                                                                                                |         |
| 40 |                                 |                      |                                                                                                                                                                                                                                                                                                                                                                                |         |
| 41 |                                 |                      |                                                                                                                                                                                                                                                                                                                                                                                |         |
| 42 |                                 |                      |                                                                                                                                                                                                                                                                                                                                                                                |         |
| 43 |                                 |                      |                                                                                                                                                                                                                                                                                                                                                                                |         |
| 44 |                                 |                      |                                                                                                                                                                                                                                                                                                                                                                                |         |
| 45 |                                 |                      |                                                                                                                                                                                                                                                                                                                                                                                |         |
| 46 |                                 |                      |                                                                                                                                                                                                                                                                                                                                                                                |         |
| 47 |                                 |                      |                                                                                                                                                                                                                                                                                                                                                                                |         |
| 48 |                                 |                      |                                                                                                                                                                                                                                                                                                                                                                                |         |
| 49 | Participant timeline            | <a href="#">#13</a>  | Time schedule of enrolment, interventions (including any run-ins and washouts), assessments, and visits for participants. A schematic diagram is highly recommended (see Figure)                                                                                                                                                                                               | 9,10,11 |
| 50 |                                 |                      |                                                                                                                                                                                                                                                                                                                                                                                |         |
| 51 |                                 |                      |                                                                                                                                                                                                                                                                                                                                                                                |         |
| 52 |                                 |                      |                                                                                                                                                                                                                                                                                                                                                                                |         |
| 53 |                                 |                      |                                                                                                                                                                                                                                                                                                                                                                                |         |
| 54 |                                 |                      |                                                                                                                                                                                                                                                                                                                                                                                |         |
| 55 |                                 |                      |                                                                                                                                                                                                                                                                                                                                                                                |         |
| 56 |                                 |                      |                                                                                                                                                                                                                                                                                                                                                                                |         |
| 57 | Sample size                     | <a href="#">#14</a>  | Estimated number of participants needed to achieve study objectives and how it was                                                                                                                                                                                                                                                                                             | 11      |
| 58 |                                 |                      |                                                                                                                                                                                                                                                                                                                                                                                |         |
| 59 |                                 |                      |                                                                                                                                                                                                                                                                                                                                                                                |         |
| 60 |                                 |                      |                                                                                                                                                                                                                                                                                                                                                                                |         |

determined, including clinical and statistical assumptions supporting any sample size calculations

Recruitment [#15](#) Strategies for achieving adequate participant enrolment to reach target sample size 11

**Methods:**  
**Assignment of interventions (for controlled trials)**

Allocation: sequence generation [#16a](#) Method of generating the allocation sequence (eg, computer-generated random numbers), and list of any factors for stratification. To reduce predictability of a random sequence, details of any planned restriction (eg, blocking) should be provided in a separate document that is unavailable to those who enrol participants or assign interventions 4,5

Allocation concealment mechanism [#16b](#) Mechanism of implementing the allocation sequence (eg, central telephone; sequentially numbered, opaque, sealed envelopes), describing any steps to conceal the sequence until interventions are assigned 4,5

Allocation: implementation [#16c](#) Who will generate the allocation sequence, who will enrol participants, and who will assign participants to interventions 4,5

Blinding (masking) [#17a](#) Who will be blinded after assignment to interventions (eg, trial participants, care providers, outcome assessors, data analysts), and how 4,5

Blinding (masking): emergency unblinding [#17b](#) If blinded, circumstances under which unblinding is permissible, and procedure for revealing a participant's allocated intervention during the trial NA

**Methods: Data collection, management, and analysis**

|    |                                                  |                      |                                                                                                                                                                                                                                                                                                                                                                                                              |          |
|----|--------------------------------------------------|----------------------|--------------------------------------------------------------------------------------------------------------------------------------------------------------------------------------------------------------------------------------------------------------------------------------------------------------------------------------------------------------------------------------------------------------|----------|
| 1  | Data collection plan                             | <a href="#">#18a</a> | Plans for assessment and collection of outcome, baseline, and other trial data, including any related processes to promote data quality (eg, duplicate measurements, training of assessors) and a description of study instruments (eg, questionnaires, laboratory tests) along with their reliability and validity, if known. Reference to where data collection forms can be found, if not in the protocol | 7, 11    |
| 2  |                                                  |                      |                                                                                                                                                                                                                                                                                                                                                                                                              |          |
| 3  |                                                  |                      |                                                                                                                                                                                                                                                                                                                                                                                                              |          |
| 4  |                                                  |                      |                                                                                                                                                                                                                                                                                                                                                                                                              |          |
| 5  |                                                  |                      |                                                                                                                                                                                                                                                                                                                                                                                                              |          |
| 6  |                                                  |                      |                                                                                                                                                                                                                                                                                                                                                                                                              |          |
| 7  |                                                  |                      |                                                                                                                                                                                                                                                                                                                                                                                                              |          |
| 8  |                                                  |                      |                                                                                                                                                                                                                                                                                                                                                                                                              |          |
| 9  |                                                  |                      |                                                                                                                                                                                                                                                                                                                                                                                                              |          |
| 10 |                                                  |                      |                                                                                                                                                                                                                                                                                                                                                                                                              |          |
| 11 |                                                  |                      |                                                                                                                                                                                                                                                                                                                                                                                                              |          |
| 12 |                                                  |                      |                                                                                                                                                                                                                                                                                                                                                                                                              |          |
| 13 |                                                  |                      |                                                                                                                                                                                                                                                                                                                                                                                                              |          |
| 14 |                                                  |                      |                                                                                                                                                                                                                                                                                                                                                                                                              |          |
| 15 | Data collection plan: retention                  | <a href="#">#18b</a> | Plans to promote participant retention and complete follow-up, including list of any outcome data to be collected for participants who discontinue or deviate from intervention protocols                                                                                                                                                                                                                    | NA       |
| 16 |                                                  |                      |                                                                                                                                                                                                                                                                                                                                                                                                              |          |
| 17 |                                                  |                      |                                                                                                                                                                                                                                                                                                                                                                                                              |          |
| 18 |                                                  |                      |                                                                                                                                                                                                                                                                                                                                                                                                              |          |
| 19 |                                                  |                      |                                                                                                                                                                                                                                                                                                                                                                                                              |          |
| 20 |                                                  |                      |                                                                                                                                                                                                                                                                                                                                                                                                              |          |
| 21 |                                                  |                      |                                                                                                                                                                                                                                                                                                                                                                                                              |          |
| 22 | Data management                                  | <a href="#">#19</a>  | Plans for data entry, coding, security, and storage, including any related processes to promote data quality (eg, double data entry; range checks for data values). Reference to where details of data management procedures can be found, if not in the protocol                                                                                                                                            | 12,13    |
| 23 |                                                  |                      |                                                                                                                                                                                                                                                                                                                                                                                                              |          |
| 24 |                                                  |                      |                                                                                                                                                                                                                                                                                                                                                                                                              |          |
| 25 |                                                  |                      |                                                                                                                                                                                                                                                                                                                                                                                                              |          |
| 26 |                                                  |                      |                                                                                                                                                                                                                                                                                                                                                                                                              |          |
| 27 |                                                  |                      |                                                                                                                                                                                                                                                                                                                                                                                                              |          |
| 28 |                                                  |                      |                                                                                                                                                                                                                                                                                                                                                                                                              |          |
| 29 |                                                  |                      |                                                                                                                                                                                                                                                                                                                                                                                                              |          |
| 30 |                                                  |                      |                                                                                                                                                                                                                                                                                                                                                                                                              |          |
| 31 |                                                  |                      |                                                                                                                                                                                                                                                                                                                                                                                                              |          |
| 32 | Statistics: outcomes                             | <a href="#">#20a</a> | Statistical methods for analysing primary and secondary outcomes. Reference to where other details of the statistical analysis plan can be found, if not in the protocol                                                                                                                                                                                                                                     | 11,12    |
| 33 |                                                  |                      |                                                                                                                                                                                                                                                                                                                                                                                                              |          |
| 34 |                                                  |                      |                                                                                                                                                                                                                                                                                                                                                                                                              |          |
| 35 |                                                  |                      |                                                                                                                                                                                                                                                                                                                                                                                                              |          |
| 36 |                                                  |                      |                                                                                                                                                                                                                                                                                                                                                                                                              |          |
| 37 |                                                  |                      |                                                                                                                                                                                                                                                                                                                                                                                                              |          |
| 38 |                                                  |                      |                                                                                                                                                                                                                                                                                                                                                                                                              |          |
| 39 | Statistics: additional analyses                  | <a href="#">#20b</a> | Methods for any additional analyses (eg, subgroup and adjusted analyses)                                                                                                                                                                                                                                                                                                                                     | 10,11,12 |
| 40 |                                                  |                      |                                                                                                                                                                                                                                                                                                                                                                                                              |          |
| 41 |                                                  |                      |                                                                                                                                                                                                                                                                                                                                                                                                              |          |
| 42 |                                                  |                      |                                                                                                                                                                                                                                                                                                                                                                                                              |          |
| 43 | Statistics: analysis population and missing data | <a href="#">#20c</a> | Definition of analysis population relating to protocol non-adherence (eg, as randomised analysis), and any statistical methods to handle missing data (eg, multiple imputation)                                                                                                                                                                                                                              | 10,11,12 |
| 44 |                                                  |                      |                                                                                                                                                                                                                                                                                                                                                                                                              |          |
| 45 |                                                  |                      |                                                                                                                                                                                                                                                                                                                                                                                                              |          |
| 46 |                                                  |                      |                                                                                                                                                                                                                                                                                                                                                                                                              |          |
| 47 |                                                  |                      |                                                                                                                                                                                                                                                                                                                                                                                                              |          |
| 48 |                                                  |                      |                                                                                                                                                                                                                                                                                                                                                                                                              |          |
| 49 | <b>Methods:</b>                                  |                      |                                                                                                                                                                                                                                                                                                                                                                                                              |          |
| 50 | <b>Monitoring</b>                                |                      |                                                                                                                                                                                                                                                                                                                                                                                                              |          |
| 51 |                                                  |                      |                                                                                                                                                                                                                                                                                                                                                                                                              |          |
| 52 |                                                  |                      |                                                                                                                                                                                                                                                                                                                                                                                                              |          |
| 53 | Data monitoring: formal committee                | <a href="#">#21a</a> | Composition of data monitoring committee (DMC); summary of its role and reporting structure; statement of whether it is independent from the sponsor and competing interests; and reference to                                                                                                                                                                                                               | 13       |
| 54 |                                                  |                      |                                                                                                                                                                                                                                                                                                                                                                                                              |          |
| 55 |                                                  |                      |                                                                                                                                                                                                                                                                                                                                                                                                              |          |
| 56 |                                                  |                      |                                                                                                                                                                                                                                                                                                                                                                                                              |          |
| 57 |                                                  |                      |                                                                                                                                                                                                                                                                                                                                                                                                              |          |
| 58 |                                                  |                      |                                                                                                                                                                                                                                                                                                                                                                                                              |          |
| 59 |                                                  |                      |                                                                                                                                                                                                                                                                                                                                                                                                              |          |
| 60 |                                                  |                      |                                                                                                                                                                                                                                                                                                                                                                                                              |          |

where further details about its charter can be found, if not in the protocol. Alternatively, an explanation of why a DMC is not needed

|    |                                      |                                                                                                                                                                                                                                    |        |
|----|--------------------------------------|------------------------------------------------------------------------------------------------------------------------------------------------------------------------------------------------------------------------------------|--------|
| 1  |                                      |                                                                                                                                                                                                                                    |        |
| 2  |                                      |                                                                                                                                                                                                                                    |        |
| 3  |                                      |                                                                                                                                                                                                                                    |        |
| 4  |                                      |                                                                                                                                                                                                                                    |        |
| 5  | Data monitoring:                     | <a href="#">#21b</a>                                                                                                                                                                                                               | 13     |
| 6  | interim analysis                     | Description of any interim analyses and stopping guidelines, including who will have access to these interim results and make the final decision to terminate the trial                                                            |        |
| 7  |                                      |                                                                                                                                                                                                                                    |        |
| 8  |                                      |                                                                                                                                                                                                                                    |        |
| 9  |                                      |                                                                                                                                                                                                                                    |        |
| 10 |                                      |                                                                                                                                                                                                                                    |        |
| 11 |                                      |                                                                                                                                                                                                                                    |        |
| 12 | Harms                                | <a href="#">#22</a>                                                                                                                                                                                                                | 13     |
| 13 |                                      | Plans for collecting, assessing, reporting, and managing solicited and spontaneously reported adverse events and other unintended effects of trial interventions or trial conduct                                                  |        |
| 14 |                                      |                                                                                                                                                                                                                                    |        |
| 15 |                                      |                                                                                                                                                                                                                                    |        |
| 16 |                                      |                                                                                                                                                                                                                                    |        |
| 17 |                                      |                                                                                                                                                                                                                                    |        |
| 18 |                                      |                                                                                                                                                                                                                                    |        |
| 19 | Auditing                             | <a href="#">#23</a>                                                                                                                                                                                                                | NA     |
| 20 |                                      | Frequency and procedures for auditing trial conduct, if any, and whether the process will be independent from investigators and the sponsor                                                                                        |        |
| 21 |                                      |                                                                                                                                                                                                                                    |        |
| 22 |                                      |                                                                                                                                                                                                                                    |        |
| 23 |                                      |                                                                                                                                                                                                                                    |        |
| 24 | <b>Ethics and dissemination</b>      |                                                                                                                                                                                                                                    |        |
| 25 |                                      |                                                                                                                                                                                                                                    |        |
| 26 |                                      |                                                                                                                                                                                                                                    |        |
| 27 |                                      |                                                                                                                                                                                                                                    |        |
| 28 | Research ethics approval             | <a href="#">#24</a>                                                                                                                                                                                                                | 12     |
| 29 |                                      | Plans for seeking research ethics committee / institutional review board (REC / IRB) approval                                                                                                                                      |        |
| 30 |                                      |                                                                                                                                                                                                                                    |        |
| 31 |                                      |                                                                                                                                                                                                                                    |        |
| 32 | Protocol amendments                  | <a href="#">#25</a>                                                                                                                                                                                                                | 13     |
| 33 |                                      | Plans for communicating important protocol modifications (eg, changes to eligibility criteria, outcomes, analyses) to relevant parties (eg, investigators, REC / IRBs, trial participants, trial registries, journals, regulators) |        |
| 34 |                                      |                                                                                                                                                                                                                                    |        |
| 35 |                                      |                                                                                                                                                                                                                                    |        |
| 36 |                                      |                                                                                                                                                                                                                                    |        |
| 37 |                                      |                                                                                                                                                                                                                                    |        |
| 38 |                                      |                                                                                                                                                                                                                                    |        |
| 39 |                                      |                                                                                                                                                                                                                                    |        |
| 40 | Consent or assent                    | <a href="#">#26a</a>                                                                                                                                                                                                               | 11     |
| 41 |                                      | Who will obtain informed consent or assent from potential trial participants or authorised surrogates, and how (see Item 32)                                                                                                       |        |
| 42 |                                      |                                                                                                                                                                                                                                    |        |
| 43 |                                      |                                                                                                                                                                                                                                    |        |
| 44 |                                      |                                                                                                                                                                                                                                    |        |
| 45 |                                      |                                                                                                                                                                                                                                    |        |
| 46 | Consent or assent: ancillary studies | <a href="#">#26b</a>                                                                                                                                                                                                               | NA     |
| 47 |                                      | Additional consent provisions for collection and use of participant data and biological specimens in ancillary studies, if applicable                                                                                              |        |
| 48 |                                      |                                                                                                                                                                                                                                    |        |
| 49 |                                      |                                                                                                                                                                                                                                    |        |
| 50 |                                      |                                                                                                                                                                                                                                    |        |
| 51 | Confidentiality                      | <a href="#">#27</a>                                                                                                                                                                                                                | 12, 13 |
| 52 |                                      | How personal information about potential and enrolled participants will be collected, shared, and maintained in order to protect confidentiality before, during, and after the trial                                               |        |
| 53 |                                      |                                                                                                                                                                                                                                    |        |
| 54 |                                      |                                                                                                                                                                                                                                    |        |
| 55 |                                      |                                                                                                                                                                                                                                    |        |
| 56 |                                      |                                                                                                                                                                                                                                    |        |
| 57 |                                      |                                                                                                                                                                                                                                    |        |
| 58 |                                      |                                                                                                                                                                                                                                    |        |
| 59 |                                      |                                                                                                                                                                                                                                    |        |
| 60 |                                      |                                                                                                                                                                                                                                    |        |

|    |                       |                      |                                                        |               |
|----|-----------------------|----------------------|--------------------------------------------------------|---------------|
| 1  | Declaration of        | <a href="#">#28</a>  | Financial and other competing interests for            | 15            |
| 2  | interests             |                      | principal investigators for the overall trial and each |               |
| 3  |                       |                      | study site                                             |               |
| 4  |                       |                      |                                                        |               |
| 5  |                       |                      |                                                        |               |
| 6  | Data access           | <a href="#">#29</a>  | Statement of who will have access to the final trial   | 15            |
| 7  |                       |                      | dataset, and disclosure of contractual agreements      |               |
| 8  |                       |                      | that limit such access for investigators               |               |
| 9  |                       |                      |                                                        |               |
| 10 |                       |                      |                                                        |               |
| 11 | Ancillary and post    | <a href="#">#30</a>  | Provisions, if any, for ancillary and post-trial care, | NA            |
| 12 | trial care            |                      | and for compensation to those who suffer harm          |               |
| 13 |                       |                      | from trial participation                               |               |
| 14 |                       |                      |                                                        |               |
| 15 |                       |                      |                                                        |               |
| 16 |                       |                      |                                                        |               |
| 17 | Dissemination policy: | <a href="#">#31a</a> | Plans for investigators and sponsor to                 | 14            |
| 18 | trial results         |                      | communicate trial results to participants,             |               |
| 19 |                       |                      | healthcare professionals, the public, and other        |               |
| 20 |                       |                      | relevant groups (eg, via publication, reporting in     |               |
| 21 |                       |                      | results databases, or other data sharing               |               |
| 22 |                       |                      | arrangements), including any publication               |               |
| 23 |                       |                      | restrictions                                           |               |
| 24 |                       |                      |                                                        |               |
| 25 |                       |                      |                                                        |               |
| 26 |                       |                      |                                                        |               |
| 27 |                       |                      |                                                        |               |
| 28 | Dissemination policy: | <a href="#">#31b</a> | Authorship eligibility guidelines and any intended     | NA            |
| 29 | authorship            |                      | use of professional writers                            |               |
| 30 |                       |                      |                                                        |               |
| 31 |                       |                      |                                                        |               |
| 32 | Dissemination policy: | <a href="#">#31c</a> | Plans, if any, for granting public access to the full  | 15            |
| 33 | reproducible          |                      | protocol, participant-level dataset, and statistical   |               |
| 34 | research              |                      | code                                                   |               |
| 35 |                       |                      |                                                        |               |
| 36 |                       |                      |                                                        |               |
| 37 | <b>Appendices</b>     |                      |                                                        |               |
| 38 |                       |                      |                                                        |               |
| 39 |                       |                      |                                                        |               |
| 40 | Informed consent      | <a href="#">#32</a>  | Model consent form and other related                   | Supplementary |
| 41 | materials             |                      | documentation given to participants and                | information   |
| 42 |                       |                      | authorised surrogates                                  |               |
| 43 |                       |                      |                                                        |               |
| 44 |                       |                      |                                                        |               |
| 45 | Biological specimens  | <a href="#">#33</a>  | Plans for collection, laboratory evaluation, and       | NA            |
| 46 |                       |                      | storage of biological specimens for genetic or         |               |
| 47 |                       |                      | molecular analysis in the current trial and for        |               |
| 48 |                       |                      | future use in ancillary studies, if applicable         |               |
| 49 |                       |                      |                                                        |               |
| 50 |                       |                      |                                                        |               |
| 51 |                       |                      |                                                        |               |

The SPIRIT Explanation and Elaboration paper is distributed under the terms of the Creative Commons Attribution License CC-BY-NC. This checklist was completed on 19. October 2023 using <https://www.goodreports.org/>, a tool made by the [EQUATOR Network](#) in collaboration with [Penelope.ai](#)
